# Supplementary material for: Synthesis of oligosaccharides related to galactomannans fromAspergillus fumigatusand their NMR spectral data
Source: Royal Society of Chemistry journal article supplement (doi:10.1039/c7ob02734f), 2018-01-01

# Synthesis of oligosaccharides related to galactomannan from *Aspergillus fumigatus* and their NMR spectra

Vadim B. Krylov,<sup>a</sup> Dmitry A. Argunov,<sup>a</sup> Arsenii S. Solovev,<sup>a</sup> Maksim I. Petruk,<sup>a</sup> Alexey G. Gerbst,<sup>a</sup> Andrey S. Dmitrenok,<sup>a</sup> Alexander S. Shashkov,<sup>a</sup> Jean-Paul Latge,<sup>b</sup> Nikolay E. Nifantiev<sup>a</sup>

<sup>1</sup>Corresponding author. Tel./fax: +7 (499) 135 8784.  
E-mail address: nen@ioc.ac.ru

<sup>a</sup> *Laboratory of Glycoconjugate Chemistry, N.D. Zelinsky Institute of Organic Chemistry,  
Russian Academy of Sciences, Leninsky Prospect 47, 119991 Moscow, Russia*

<sup>b</sup> *Unité des Aspergillus, Institut Pasteur, 25 rue du Docteur Roux, 75724 Paris Cedex 15, France*

**Table S1.** <sup>1</sup>H NMR chemical shifts ( $\delta$ , ppm; D<sub>2</sub>O) of oligosaccharides **1-13**.<sup>a</sup>

| #         | Unit                                                                                | H(1) | H(2) | H(3) | H(4) | H(5) | H(6) | H(6') |
|-----------|-------------------------------------------------------------------------------------|------|------|------|------|------|------|-------|
| <b>1</b>  | $\beta$ -D-Galf-(1 $\rightarrow$                                                    | 5.03 | 4.11 | 4.07 | 3.99 | 3.83 | 3.71 | 3.65  |
|           | $\rightarrow$ 6)- $\beta$ -D-Galf-O(CH <sub>2</sub> ) <sub>3</sub> NH <sub>2</sub>  | 5.01 | 4.07 | 4.07 | 3.99 | 3.96 | 3.87 | 3.61  |
| <b>2</b>  | $\beta$ -D-Galf-(1 $\rightarrow$                                                    | 5.04 | 4.12 | 4.07 | 4.00 | 3.83 | 3.71 | 3.65  |
|           | $\rightarrow$ 6)- $\beta$ -D-Galf-(1 $\rightarrow$                                  | 5.22 | 4.14 | 4.07 | 4.07 | 3.97 | 3.88 | 3.63  |
|           | $\rightarrow$ 5)- $\beta$ -D-Galf-O(CH <sub>2</sub> ) <sub>3</sub> NH <sub>2</sub>  | 4.99 | 4.07 | 4.12 | 4.08 | 3.95 | 3.79 | 3.79  |
| <b>3</b>  | $\beta$ -D-Galf-(1 $\rightarrow$                                                    | 5.24 | 4.16 | 4.09 | 4.09 | 3.86 | 3.73 | 3.68  |
|           | $\rightarrow$ 5)- $\beta$ -D-Galf-O(CH <sub>2</sub> ) <sub>3</sub> NH <sub>2</sub>  | 5.00 | 4.08 | 4.15 | 4.09 | 3.97 | 3.80 | 3.80  |
| <b>4</b>  | $\beta$ -D-Galf-(1 $\rightarrow$                                                    | 5.21 | 4.14 | 4.07 | 4.07 | 3.84 | 3.72 | 3.66  |
|           | $\rightarrow$ 5)- $\beta$ -D-Galf-(1 $\rightarrow$                                  | 5.19 | 4.14 | 4.11 | 4.16 | 3.96 | 3.79 | 3.79  |
|           | $\rightarrow$ 5)- $\beta$ -D-Galf-O(CH <sub>2</sub> ) <sub>3</sub> NH <sub>2</sub>  | 4.99 | 4.07 | 4.13 | 4.08 | 3.93 | 3.79 | 3.79  |
| <b>5</b>  | $\beta$ -D-Galf-(1 $\rightarrow$                                                    | 5.13 | 4.15 | 4.07 | 4.05 | 3.83 | 3.68 | 3.64  |
|           | $\rightarrow$ 3)- $\alpha$ -D-Manp-O(CH <sub>2</sub> ) <sub>3</sub> NH <sub>2</sub> | 4.89 | 4.14 | 3.87 | 3.71 | 3.63 | 3.88 | 3.75  |
| <b>6</b>  | $\beta$ -D-Galf-(1 $\rightarrow$                                                    | 5.20 | 4.13 | 4.06 | 4.05 | 3.82 | 3.70 | 3.66  |
|           | $\rightarrow$ 5)- $\beta$ -D-Galf-(1 $\rightarrow$                                  | 5.10 | 4.12 | 4.12 | 4.14 | 3.95 | 3.77 | 3.77  |
|           | $\rightarrow$ 3)- $\alpha$ -D-Manp-O(CH <sub>2</sub> ) <sub>3</sub> NH <sub>2</sub> | 4.89 | 4.13 | 3.85 | 3.71 | 3.63 | 3.88 | 3.75  |
| <b>7</b>  | $\beta$ -D-Galf-(1 $\rightarrow$                                                    | 5.20 | 4.13 | 4.06 | 4.05 | 3.82 | 3.70 | 3.66  |
|           | $\rightarrow$ 5)- $\beta$ -D-Galf-(1 $\rightarrow$ <sup>b</sup>                     | 5.18 | 4.13 | 4.10 | 4.14 | 3.93 | 3.78 | 3.78  |
|           | $\rightarrow$ 5)- $\beta$ -D-Galf-(1 $\rightarrow$                                  | 5.10 | 4.13 | 4.10 | 4.14 | 3.93 | 3.78 | 3.78  |
|           | $\rightarrow$ 3)- $\alpha$ -D-Manp-O(CH <sub>2</sub> ) <sub>3</sub> NH <sub>2</sub> | 4.88 | 4.12 | 3.84 | 3.70 | 3.63 | 3.90 | 3.74  |
| <b>8</b>  | $\beta$ -D-Galf-(1 $\rightarrow$                                                    | 5.04 | 4.10 | 4.06 | 3.98 | 3.81 | 3.70 | 3.64  |
|           | $\rightarrow$ 6)- $\alpha$ -D-Manp-O(CH <sub>2</sub> ) <sub>3</sub> NH <sub>2</sub> | 4.84 | 3.95 | 3.79 | 3.68 | 3.71 | 4.00 | 3.72  |
| <b>9</b>  | $\beta$ -D-Galf-(1 $\rightarrow$                                                    | 5.21 | 4.14 | 4.07 | 4.07 | 3.84 | 3.72 | 3.67  |
|           | $\rightarrow$ 5)- $\beta$ -D-Galf-(1 $\rightarrow$                                  | 5.03 | 4.10 | 4.11 | 4.09 | 3.95 | 3.79 | 3.79  |
|           | $\rightarrow$ 6)- $\alpha$ -D-Manp-O(CH <sub>2</sub> ) <sub>3</sub> NH <sub>2</sub> | 4.85 | 3.95 | 3.79 | 3.70 | 3.71 | 4.01 | 3.72  |
| <b>10</b> | $\beta$ -D-Galf-(1 $\rightarrow$                                                    | 5.21 | 4.14 | 4.06 | 4.06 | 3.83 | 3.71 | 3.66  |
|           | $\rightarrow$ 5)- $\beta$ -D-Galf-(1 $\rightarrow$ <sup>b</sup>                     | 5.18 | 4.14 | 4.10 | 4.15 | 3.95 | 3.79 | 3.79  |
|           | $\rightarrow$ 5)- $\beta$ -D-Galf-(1 $\rightarrow$                                  | 5.02 | 4.10 | 4.10 | 4.08 | 3.95 | 3.79 | 3.79  |
|           | $\rightarrow$ 6)- $\alpha$ -D-Manp-O(CH <sub>2</sub> ) <sub>3</sub> NH <sub>2</sub> | 4.84 | 3.95 | 3.78 | 3.69 | 3.70 | 4.00 | 3.71  |
| <b>11</b> | $\beta$ -D-Galf-(1 $\rightarrow$                                                    | 5.21 | 4.14 | 4.06 | 4.06 | 3.84 | 3.71 | 3.67  |
|           | $\rightarrow$ 5)- $\beta$ -D-Galf-(1 $\rightarrow$ <sup>c</sup>                     | 5.18 | 4.14 | 4.10 | 4.15 | 3.94 | 3.80 | 3.80  |
|           | $\rightarrow$ 5)- $\beta$ -D-Galf-(1 $\rightarrow$                                  | 5.03 | 4.06 | 4.10 | 4.08 | 3.94 | 3.80 | 3.80  |
|           | $\rightarrow$ 6)- $\alpha$ -D-Manp-O(CH <sub>2</sub> ) <sub>3</sub> NH <sub>2</sub> | 4.84 | 3.95 | 3.78 | 3.69 | 3.71 | 4.00 | 3.72  |
| <b>12</b> | $\beta$ -D-Galf-(1 $\rightarrow$                                                    | 5.21 | 4.14 | 4.06 | 4.06 | 3.83 | 3.70 | 3.67  |
|           | $\rightarrow$ 5)- $\beta$ -D-Galf-(1 $\rightarrow$                                  | 5.01 | 4.10 | 4.11 | 4.09 | 3.94 | 3.79 | 3.79  |
|           | $\rightarrow$ 6)- $\beta$ -D-Galf-(1 $\rightarrow$                                  | 5.22 | 4.14 | 4.11 | 4.07 | 3.97 | 3.87 | 3.63  |
|           | $\rightarrow$ 5)- $\beta$ -D-Galf-(1 $\rightarrow$                                  | 5.03 | 4.11 | 4.11 | 4.09 | 3.96 | 3.79 | 3.79  |
|           | $\rightarrow$ 6)- $\alpha$ -D-Manp-O(CH <sub>2</sub> ) <sub>3</sub> NH <sub>2</sub> | 4.84 | 3.95 | 3.78 | 3.69 | 3.71 | 4.01 | 3.72  |
| <b>13</b> | $\beta$ -D-Galf-(1 $\rightarrow$                                                    | 5.11 | 4.13 | 4.08 | 4.08 | 3.82 | 3.69 | 3.65  |
|           | $\rightarrow$ 2)- $\alpha$ -D-Manp-(1 $\rightarrow$                                 | 5.16 | 4.16 | 3.90 | 3.61 | 3.78 | 3.89 | 3.74  |
|           | $\rightarrow$ 2)- $\alpha$ -D-Manp-O(CH <sub>2</sub> ) <sub>3</sub> NH <sub>2</sub> | 5.10 | 3.99 | 3.88 | 3.68 | 3.59 | 3.89 | 3.74  |

<sup>a</sup> aglycon signals  $\delta$  (ppm): Manp-OCH<sub>2</sub>-CH<sub>2</sub>-CH<sub>2</sub>-NH<sub>2</sub> – 3.85, 3.61, Manp-OCH<sub>2</sub>-CH<sub>2</sub>-CH<sub>2</sub>-NH<sub>2</sub> – 1.98, Manp-OCH<sub>2</sub>-CH<sub>2</sub>-CH<sub>2</sub>-NH<sub>2</sub> – 3.13; Galf-OCH<sub>2</sub>-CH<sub>2</sub>-CH<sub>2</sub>-NH<sub>2</sub> – 3.86, 3.66, Galf-OCH<sub>2</sub>-CH<sub>2</sub>-CH<sub>2</sub>-NH<sub>2</sub> – 1.98, Galf-OCH<sub>2</sub>-CH<sub>2</sub>-CH<sub>2</sub>-NH<sub>2</sub> – 3.13, (internal standard CH<sub>3</sub>CN – 2.06). <sup>b</sup> two internal residues. <sup>c</sup> four internal residues

### 3-Trifluoroacetamidopropyl 2,3,5-tri-*O*-benzoyl-6-*O*-(9-fluorenylmethoxycarbonyl)- $\beta$ -D-galactofuranoside 17

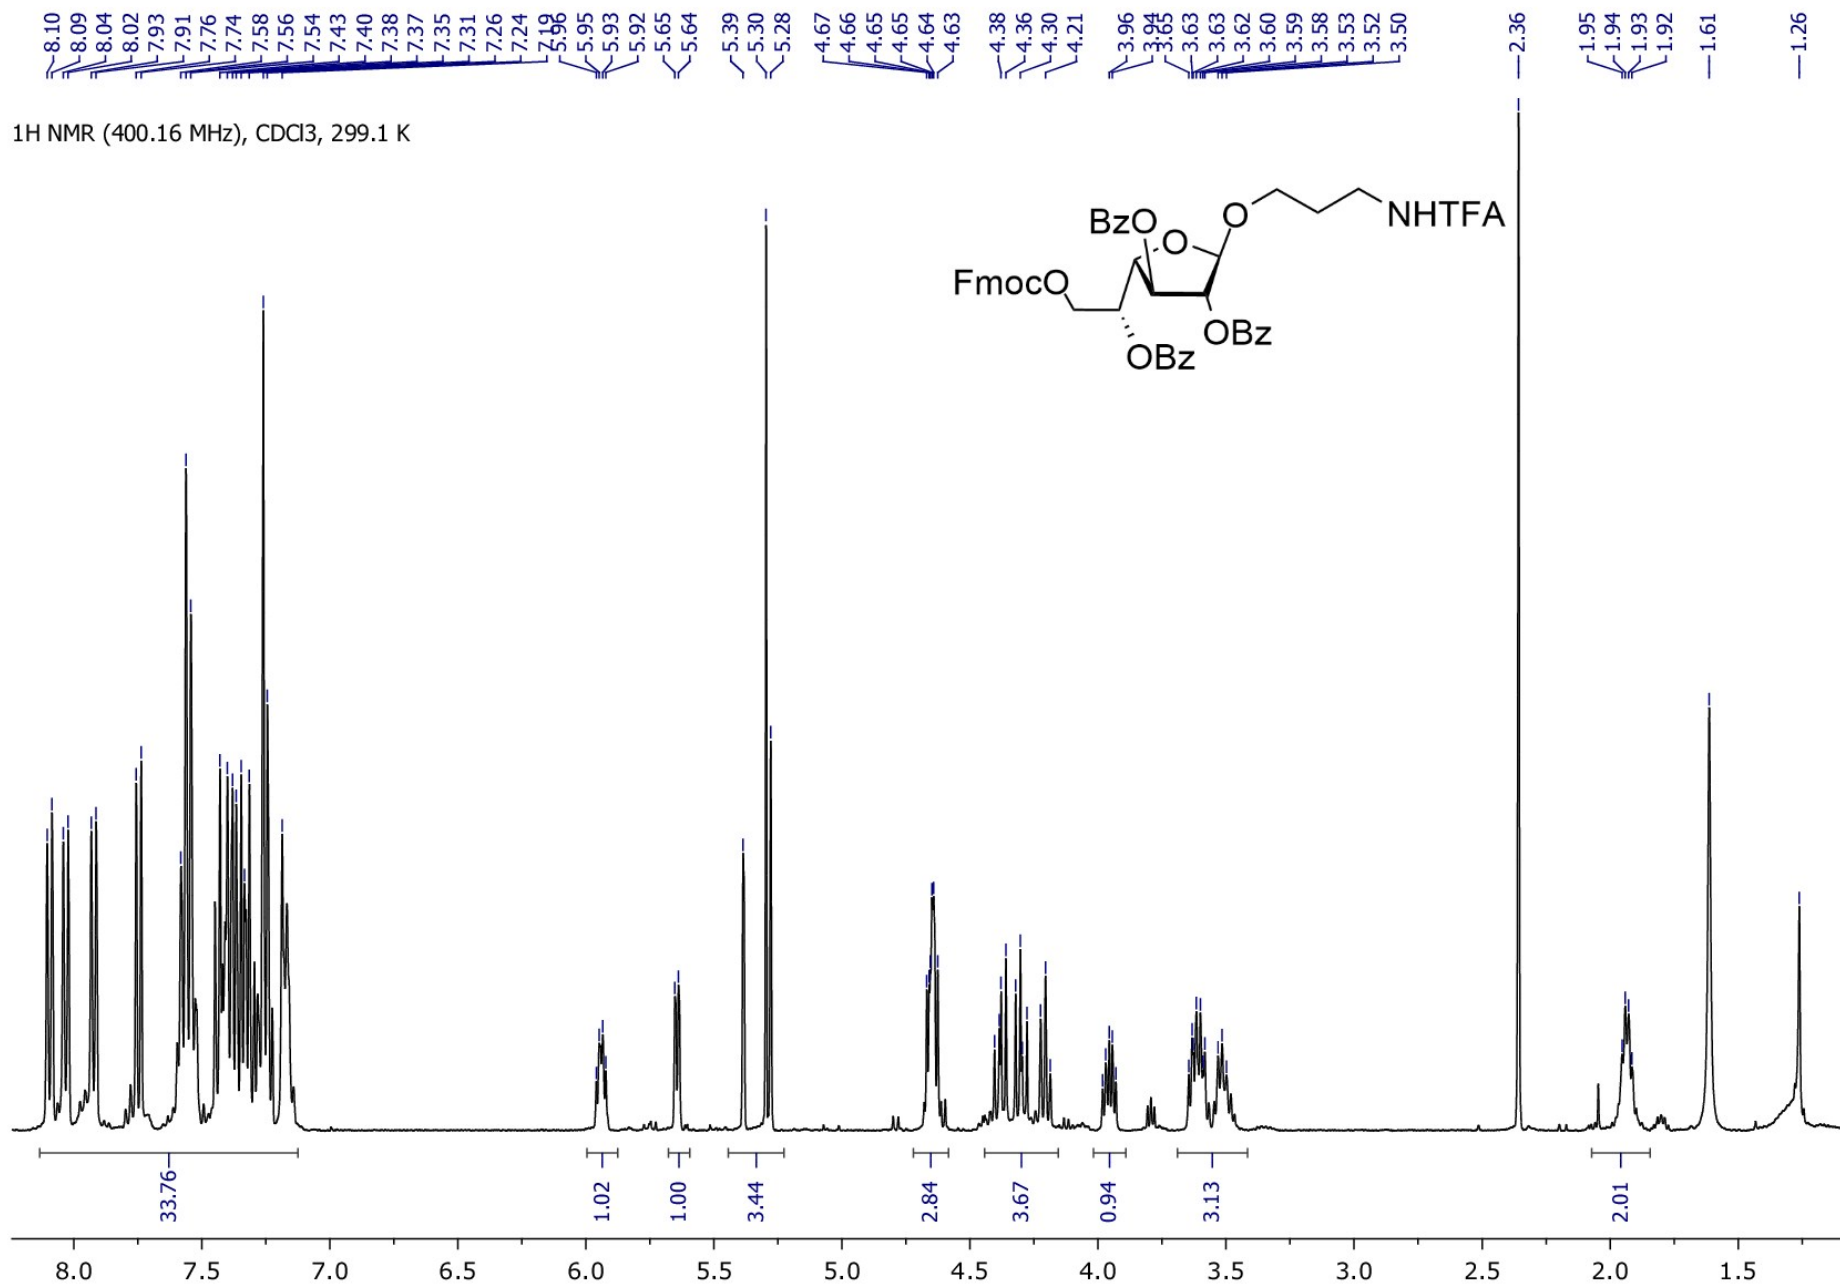

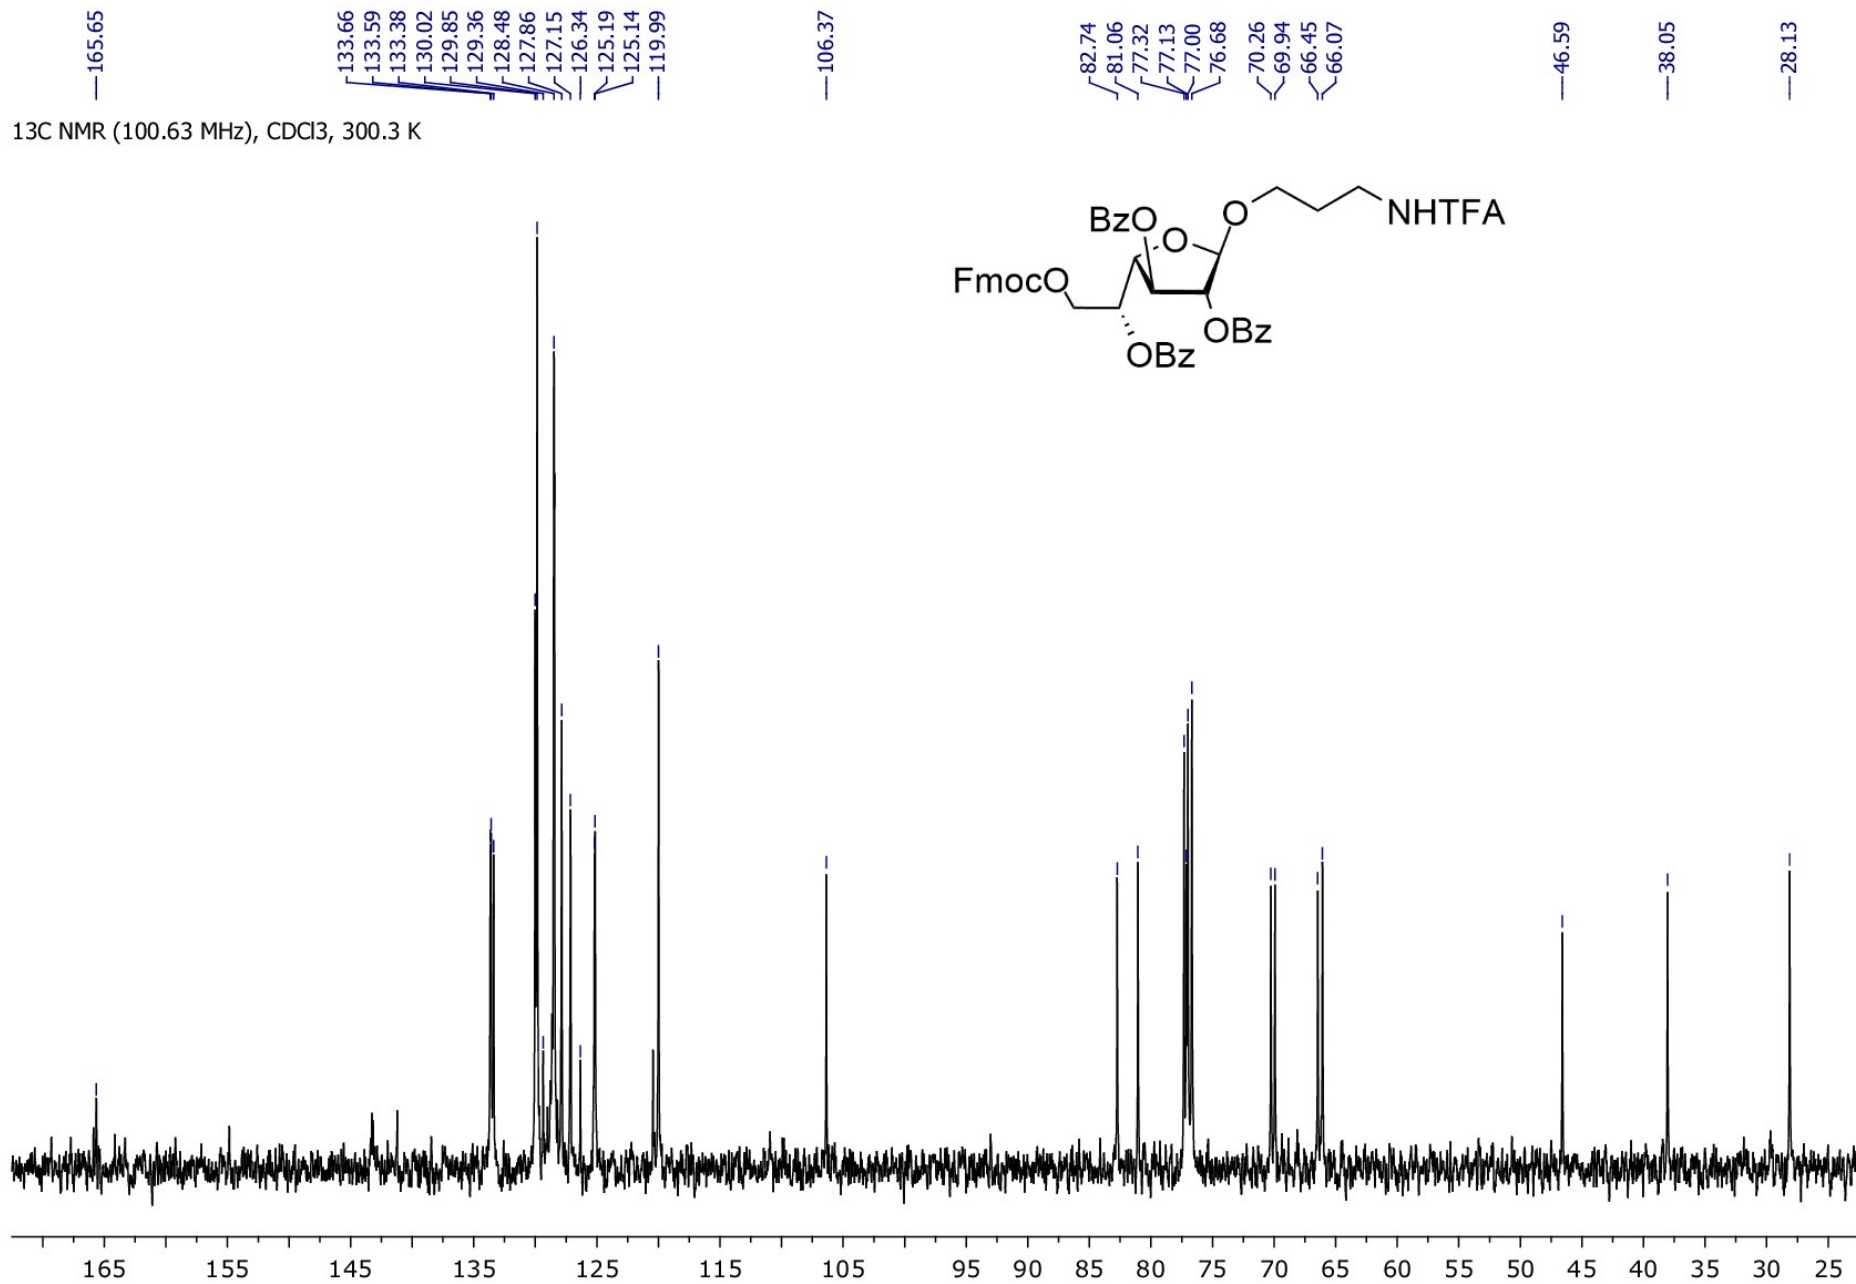

### 3-Trifluoroacetamidopropyl 2,3,5-tri-*O*-benzoyl- $\beta$ -D-galactofuranoside 18

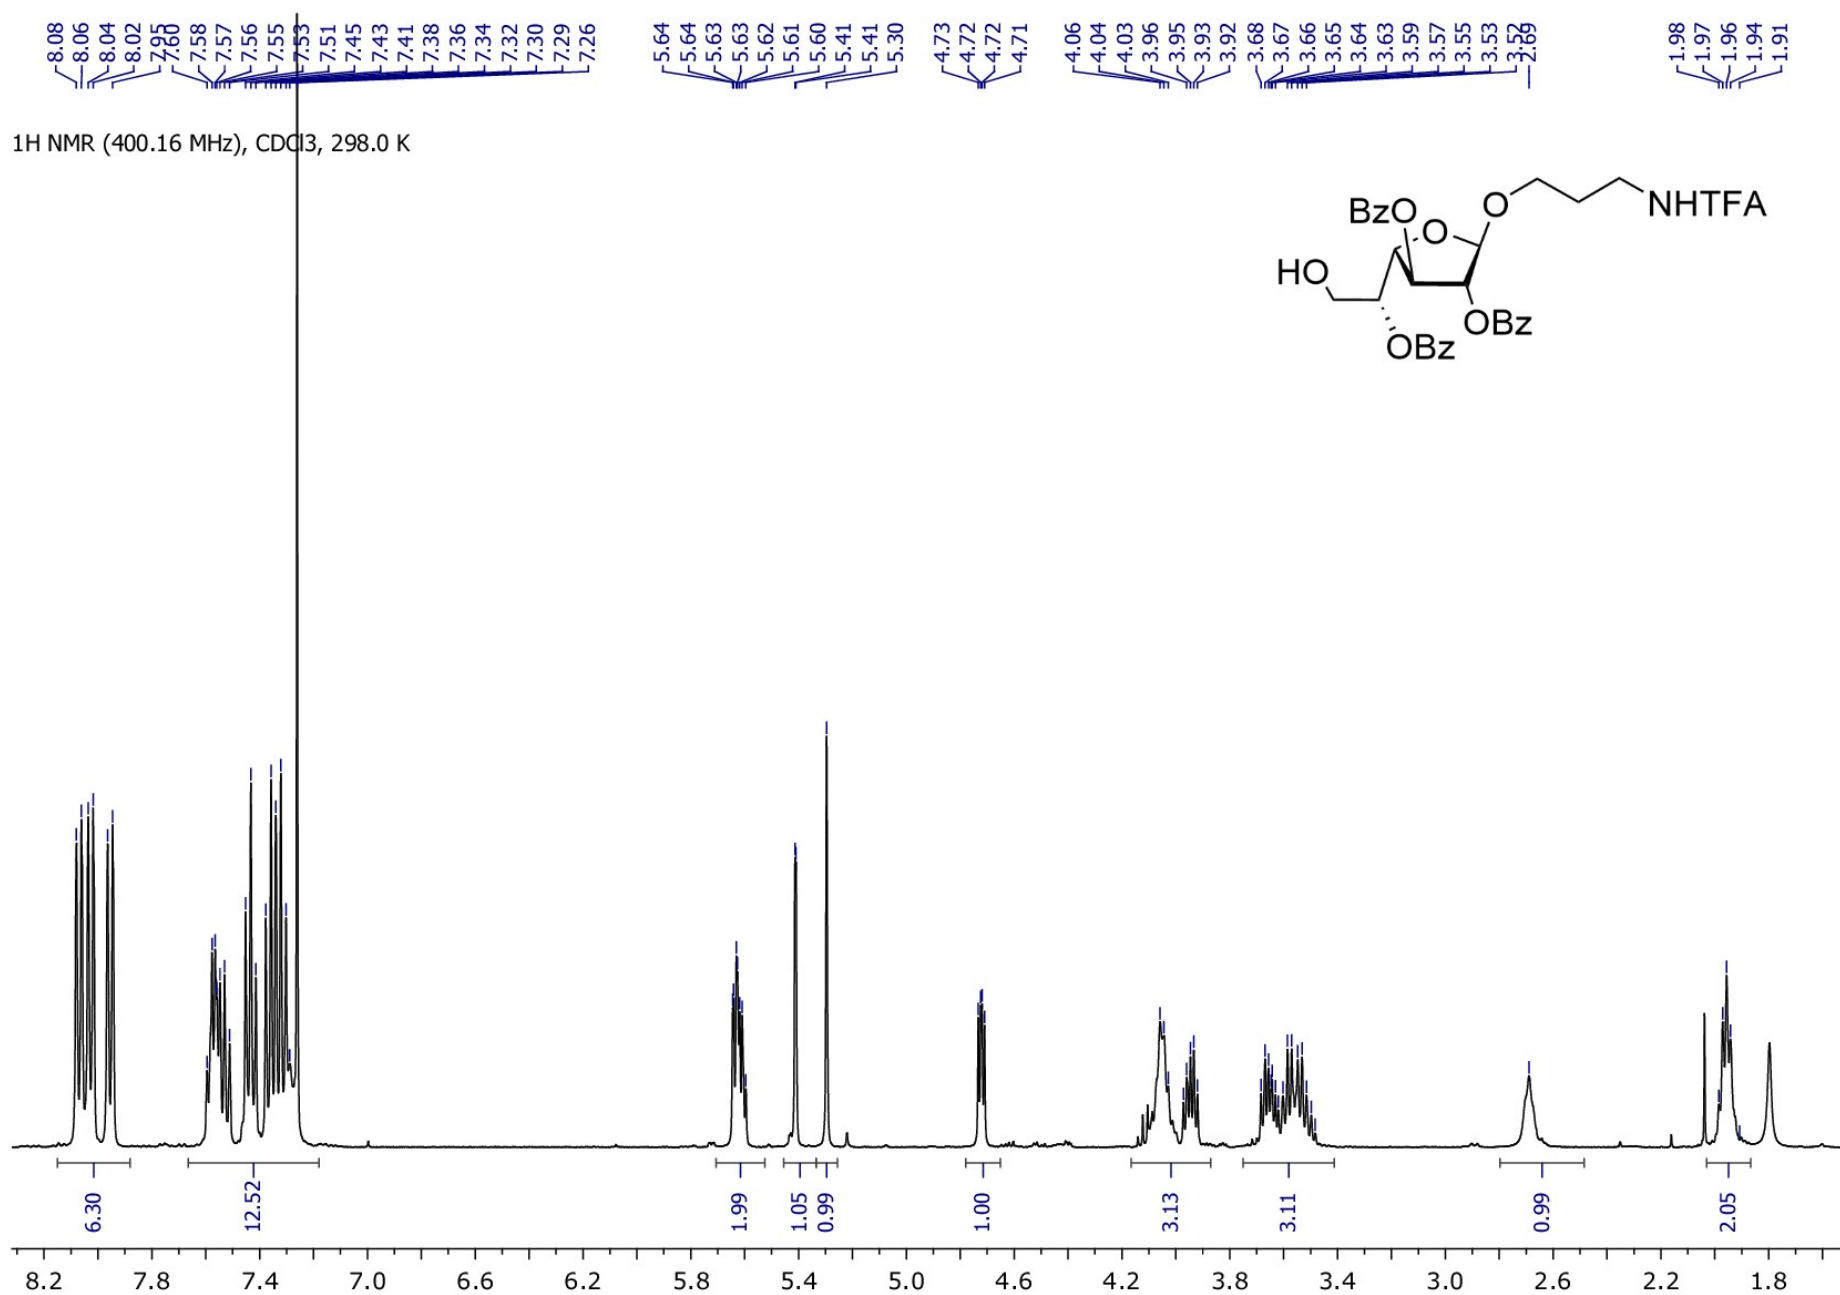

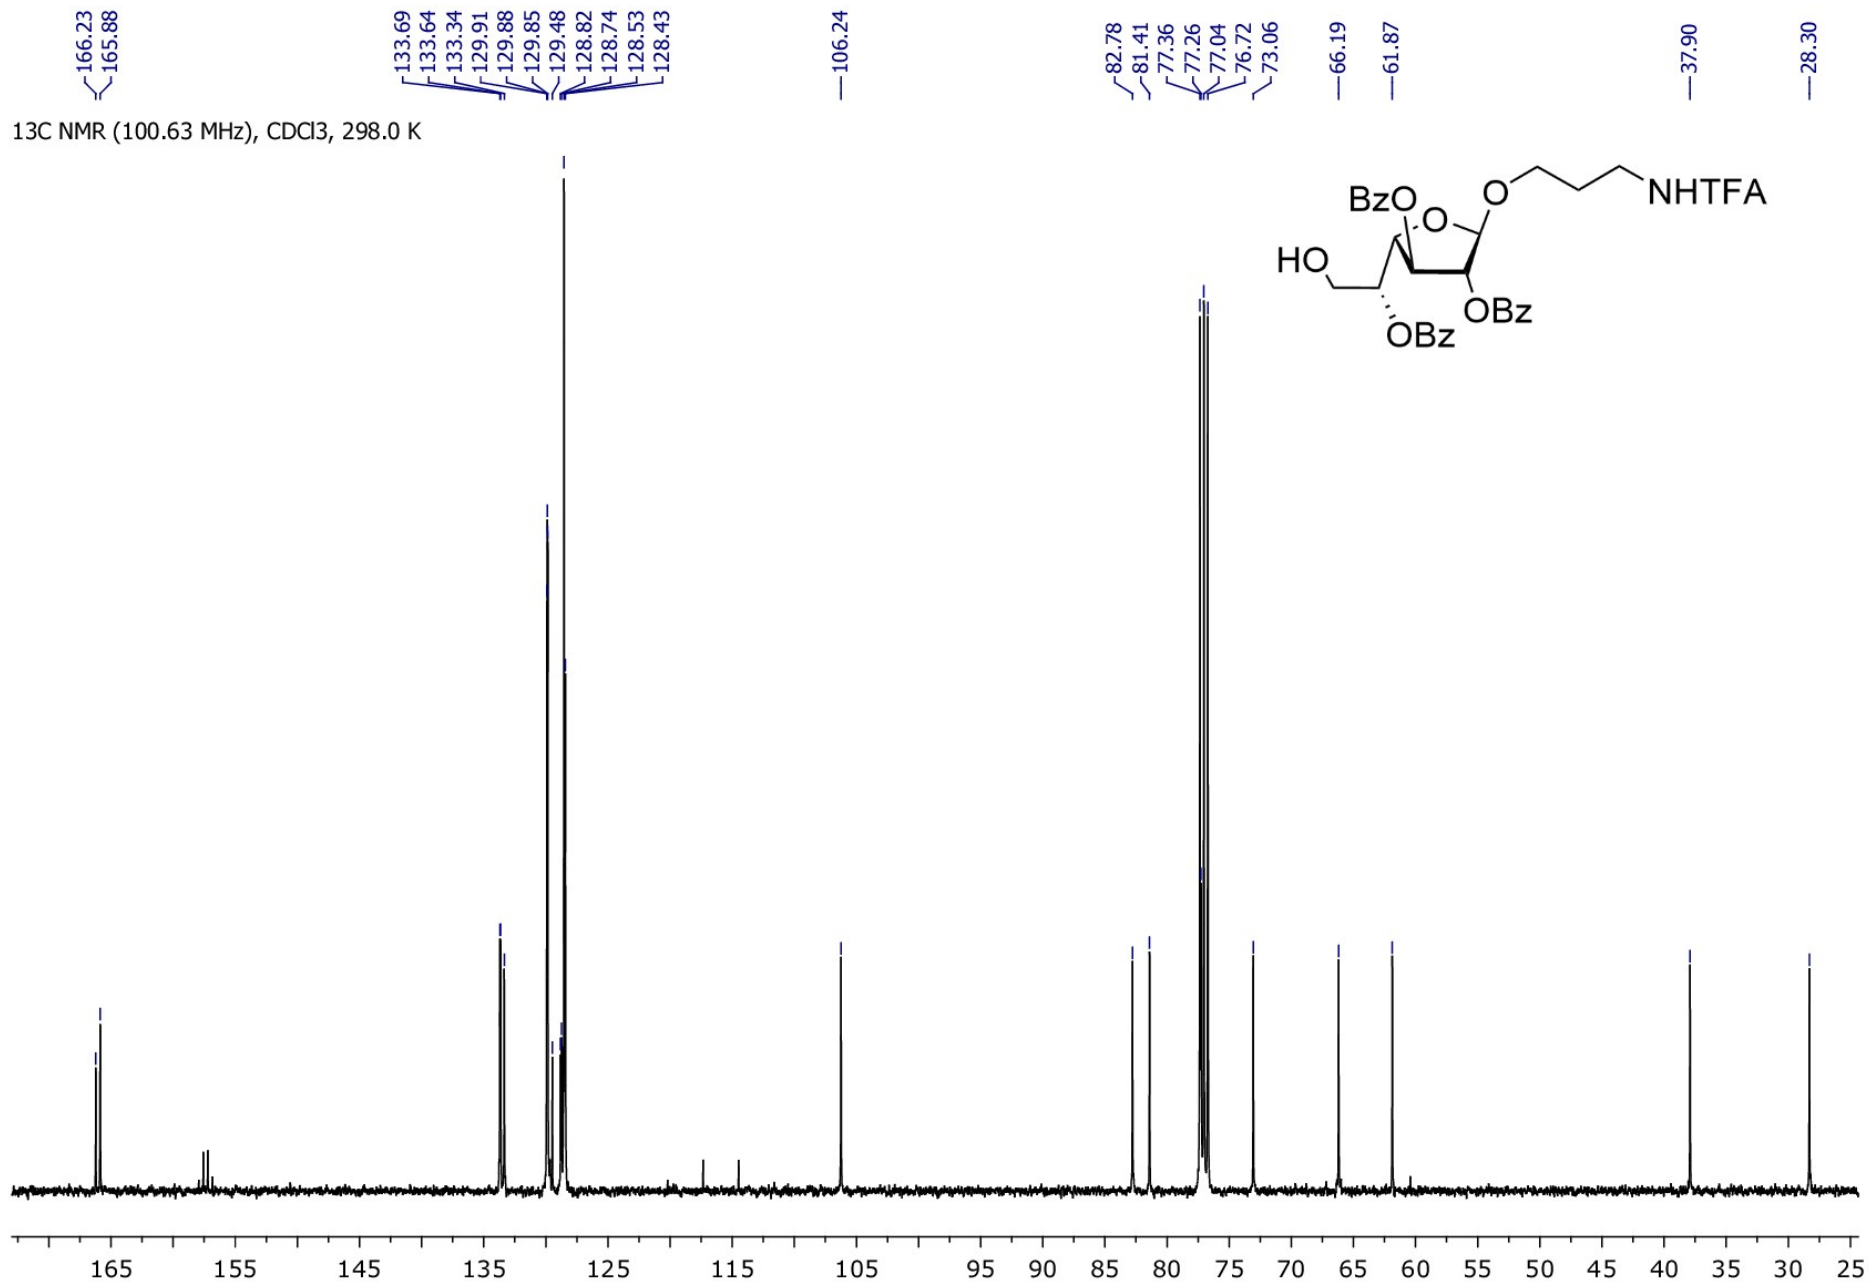

### 3-trifluoroacetamidopropyl 2,3,6-tri-*O*-benzoyl- $\beta$ -D-galactofuranoside 19

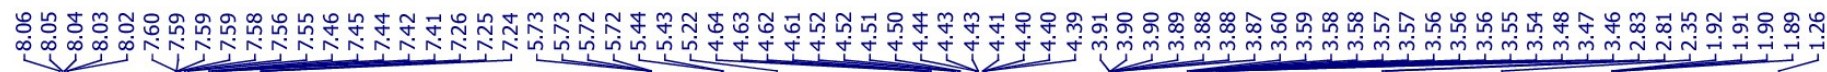

<sup>1</sup>H NMR (600.13 MHz), CDCl<sub>3</sub>, 299.2 K

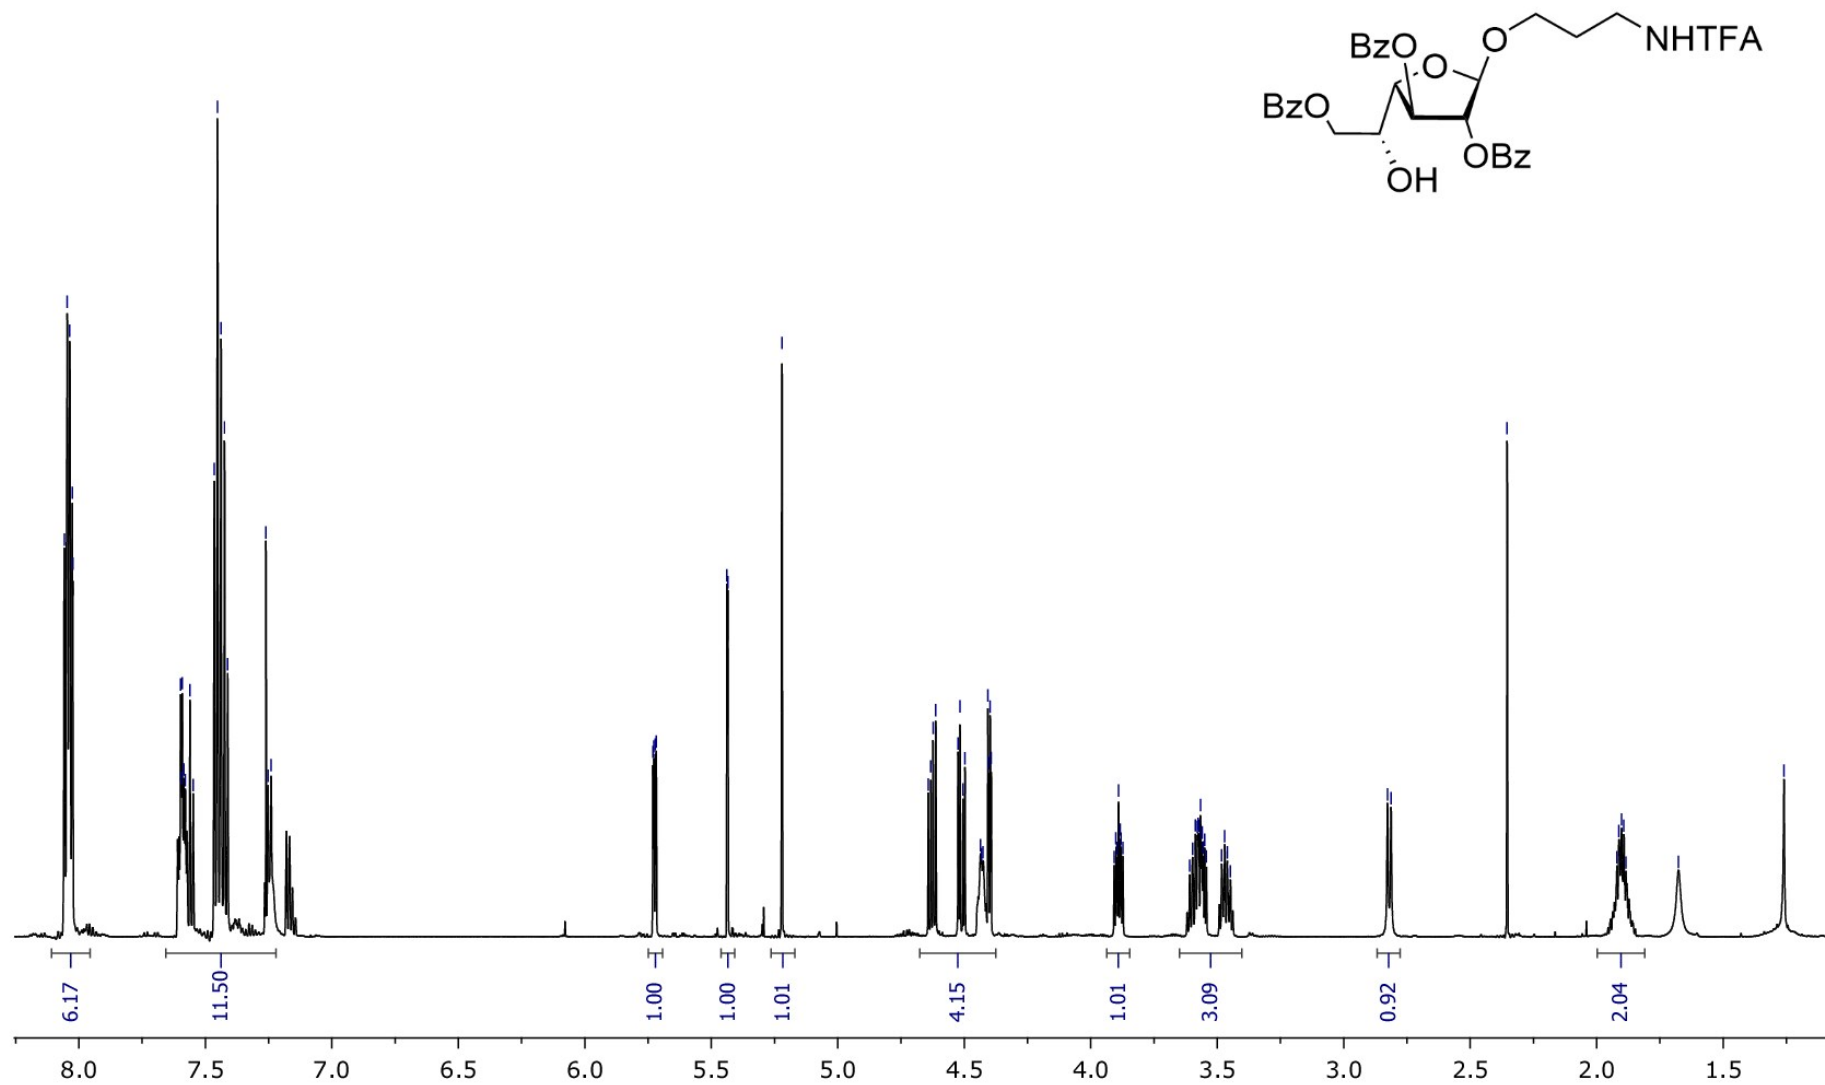

166.60  
166.09  
165.79

133.74  
133.23  
129.90  
129.83  
129.64  
128.58  
128.56  
128.42

106.27

82.71  
82.25  
77.49  
77.21  
77.00  
76.79

68.81  
66.33  
65.97

38.04

28.19

$^{13}\text{C}$  NMR (150.92 MHz),  $\text{CDCl}_3$ , 299.3 K

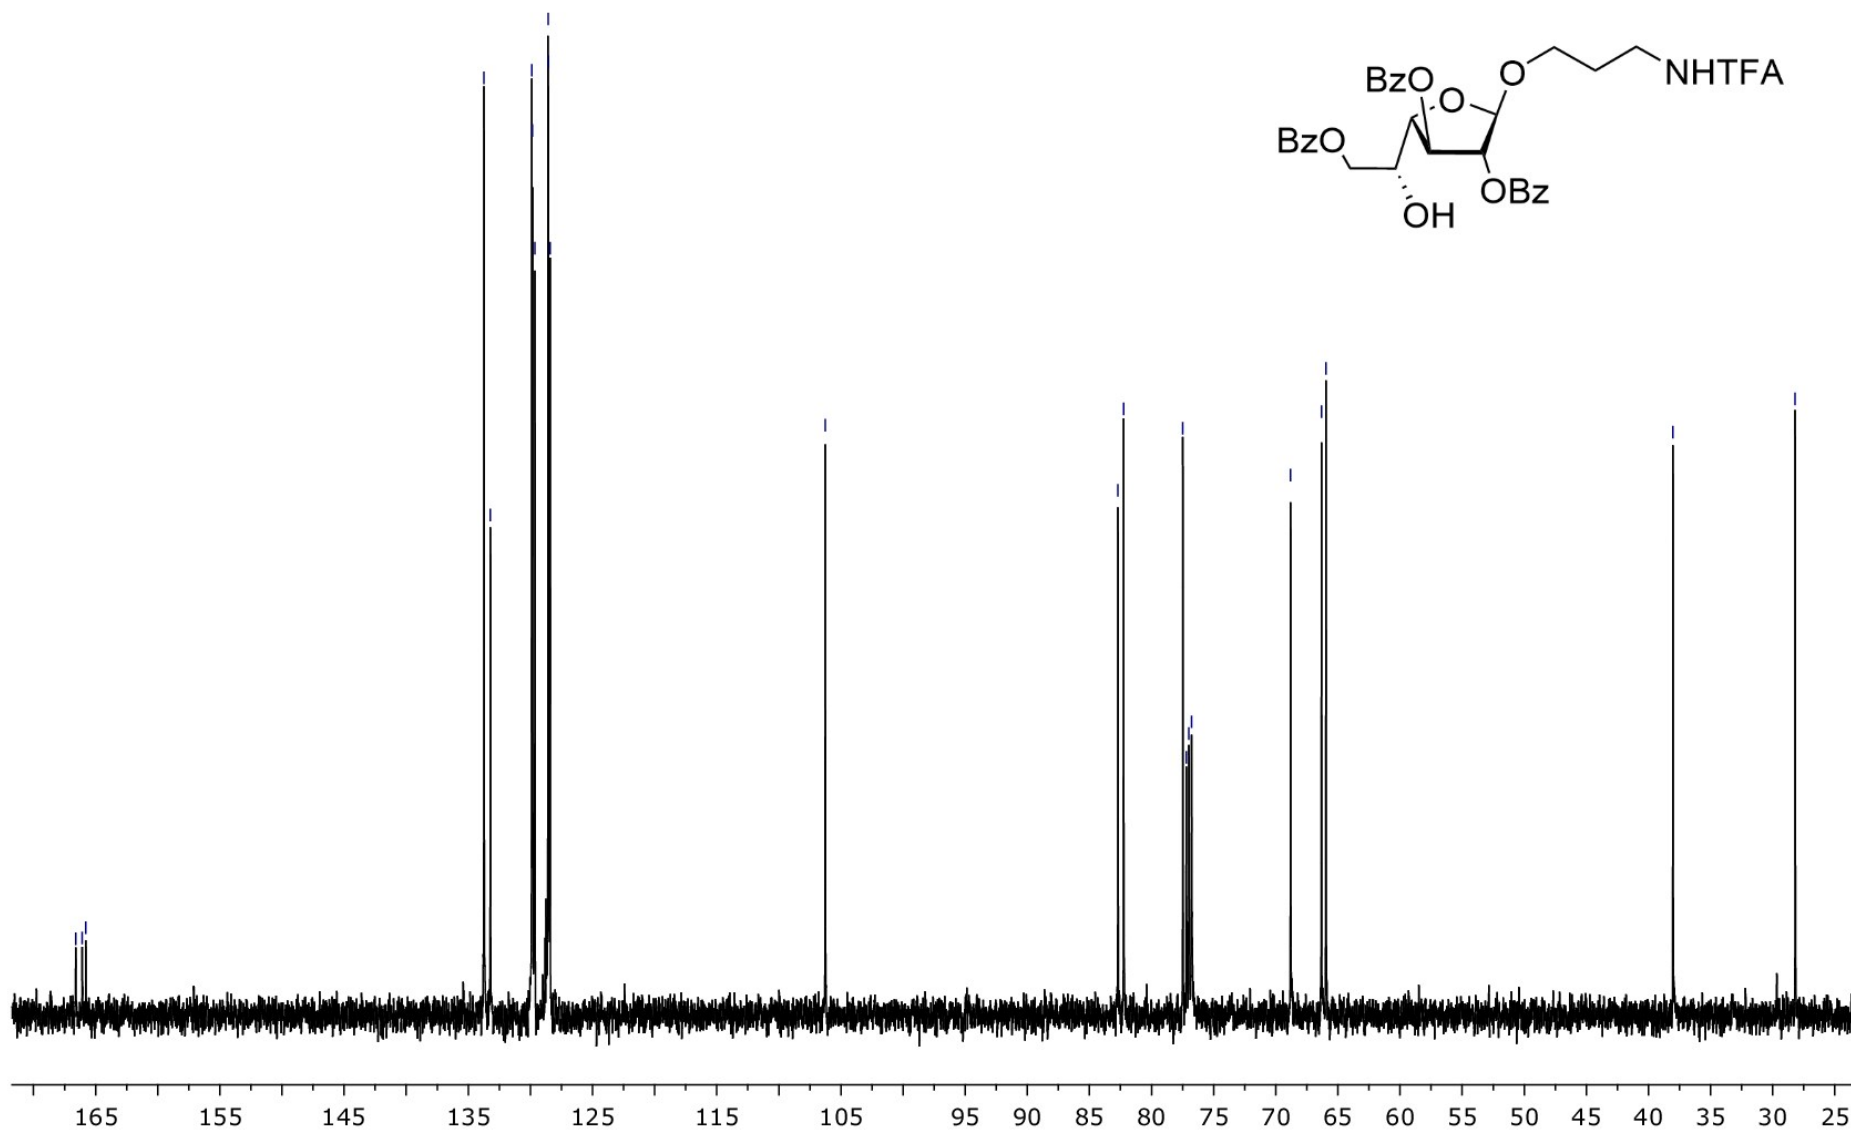



**3-Trifluoroacetamidopropyl 2,3,5-tri-*O*-benzoyl-6-*O*-(9-fluorenylmethoxycarbonyl)- $\beta$ -D-galactofuranosyl-(1 $\rightarrow$ 5)-2,3,6-tri-*O*-benzoyl- $\beta$ -D-galactofuranosyl-(1 $\rightarrow$ 5)-2,3,6-tri-*O*-benzoyl- $\beta$ -D-galactofuranoside 21**

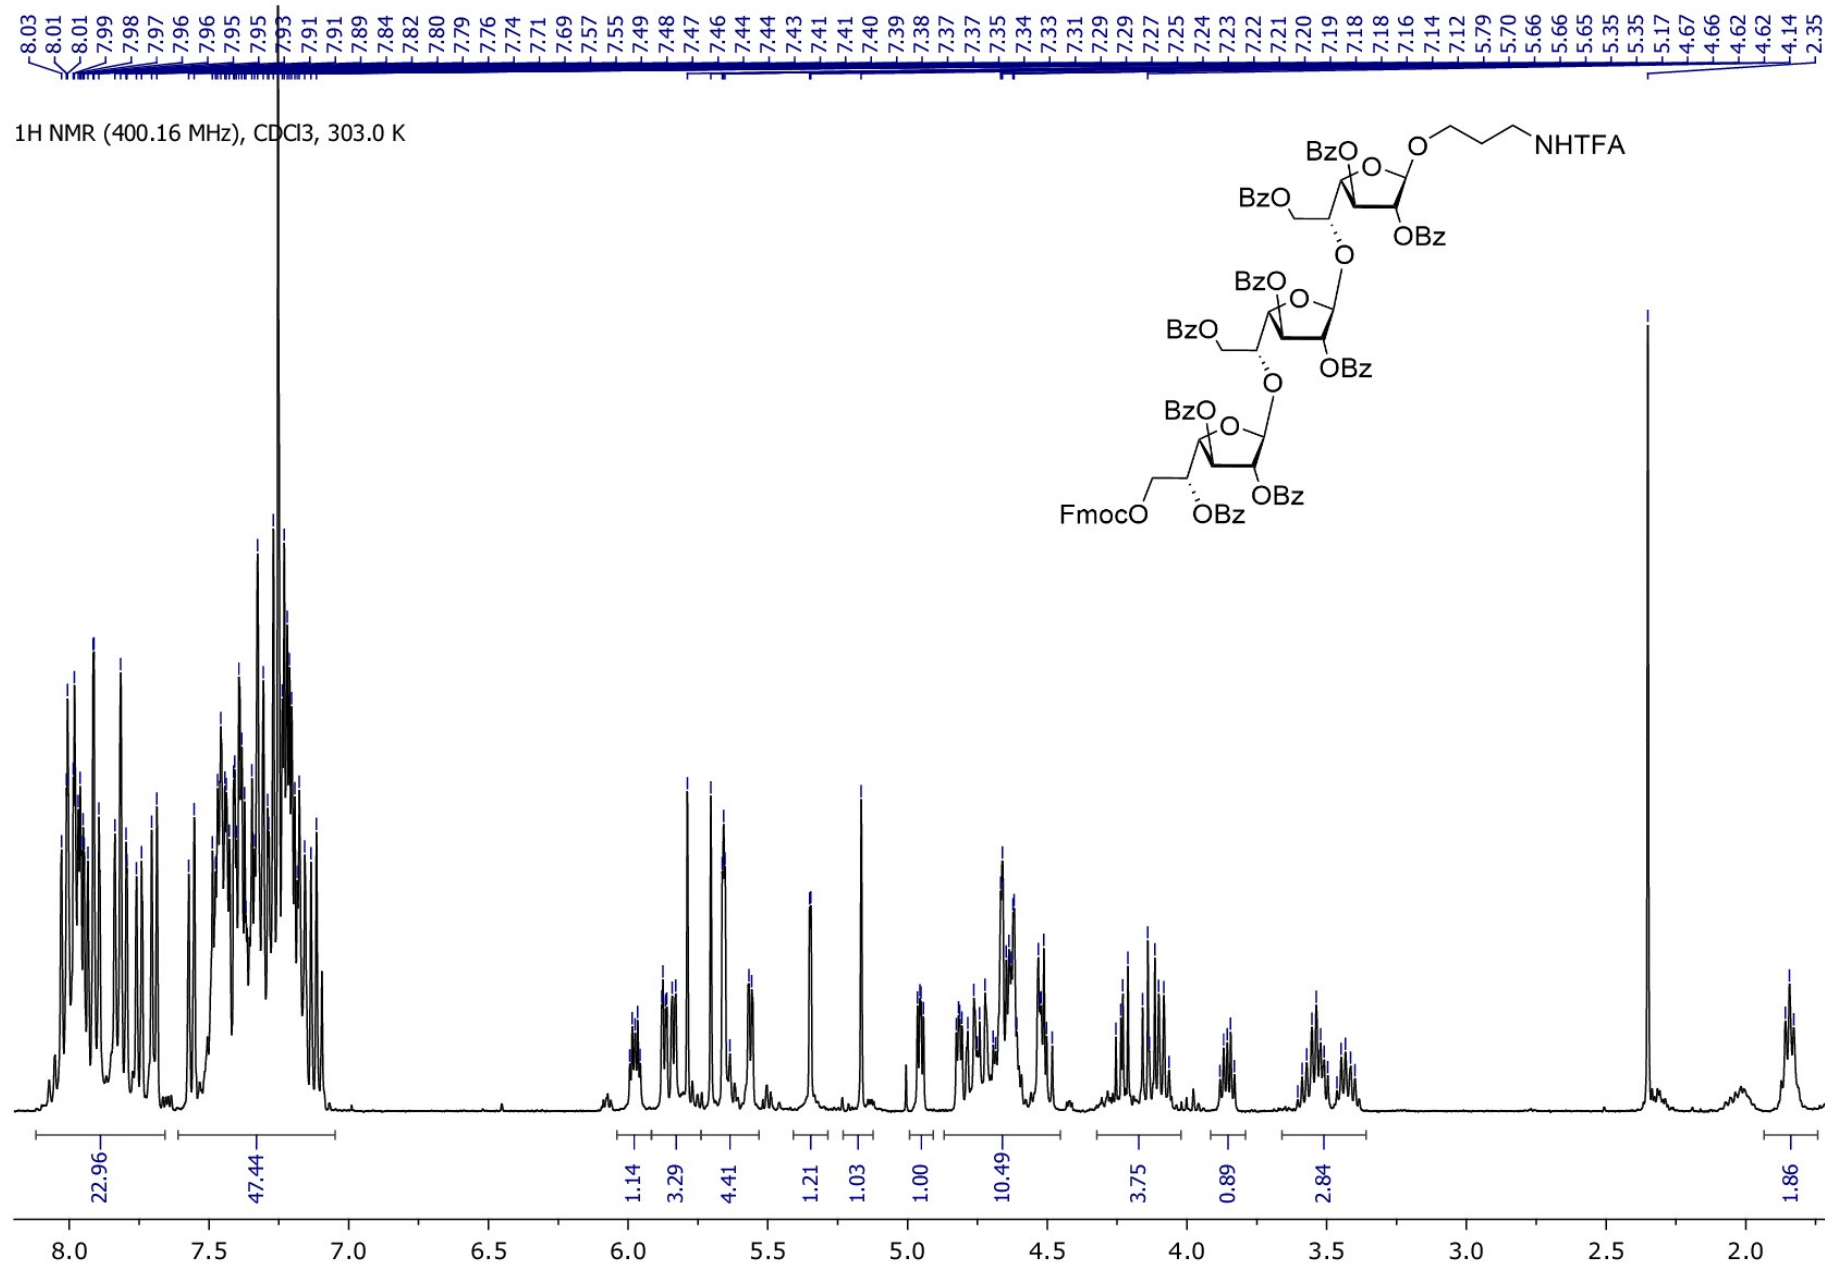

166.19  
165.84  
165.68  
165.54  
165.29  
165.20  
154.76

143.41  
143.25  
141.15

129.81  
129.76  
129.70  
129.66  
129.61  
128.54  
128.44  
128.35  
119.88

106.00  
105.53  
105.47

83.42  
82.48  
82.26  
82.01  
81.90  
81.74  
77.66  
77.32  
77.00  
76.68  
73.69  
73.17  
70.17  
70.10  
66.71  
66.30  
65.35  
63.98

46.54

38.15

28.14

<sup>13</sup>C NMR (100.62 MHz), CDCl<sub>3</sub>, 303.0 K

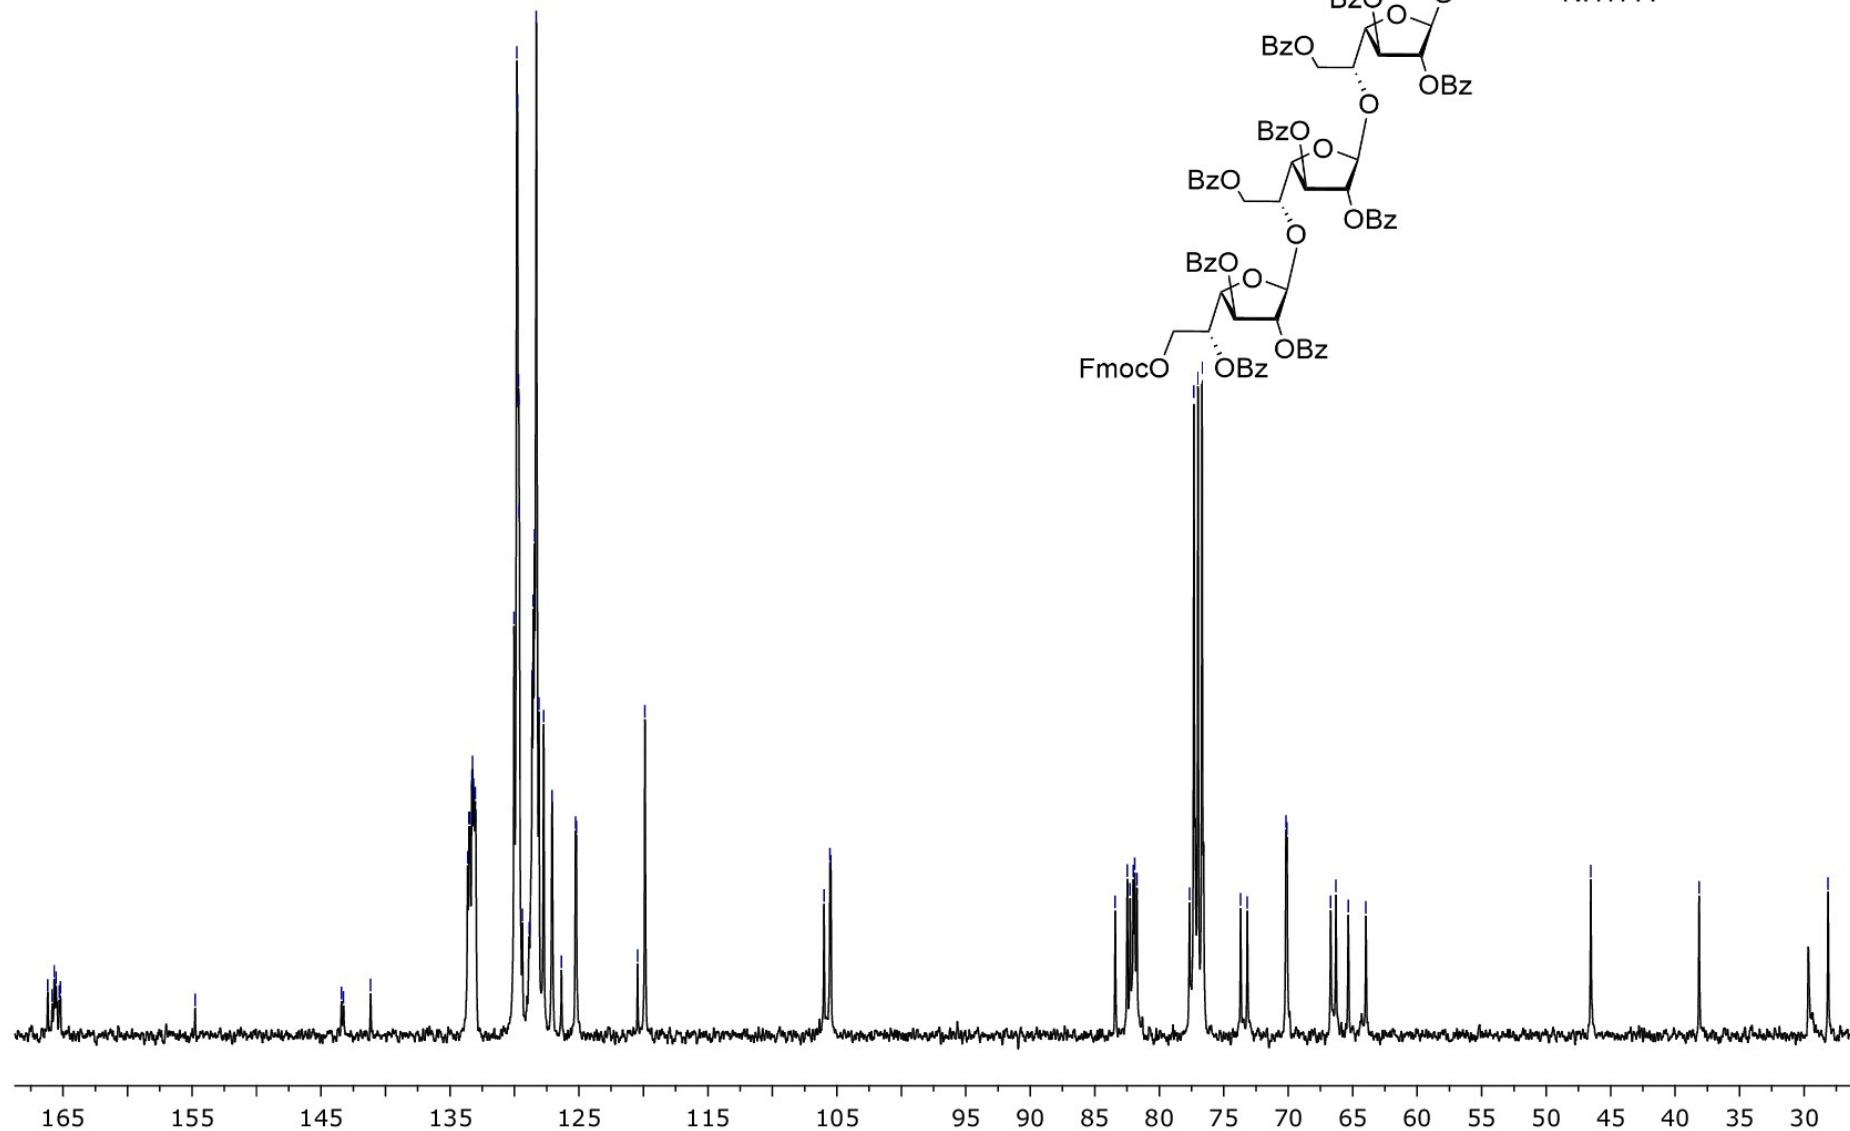

### 3-Aminopropyl $\beta$ -D-galactofuranosyl-(1 $\rightarrow$ 5)- $\beta$ -D-galactofuranosyl-(1 $\rightarrow$ 5)- $\beta$ -D-galactofuranoside 4

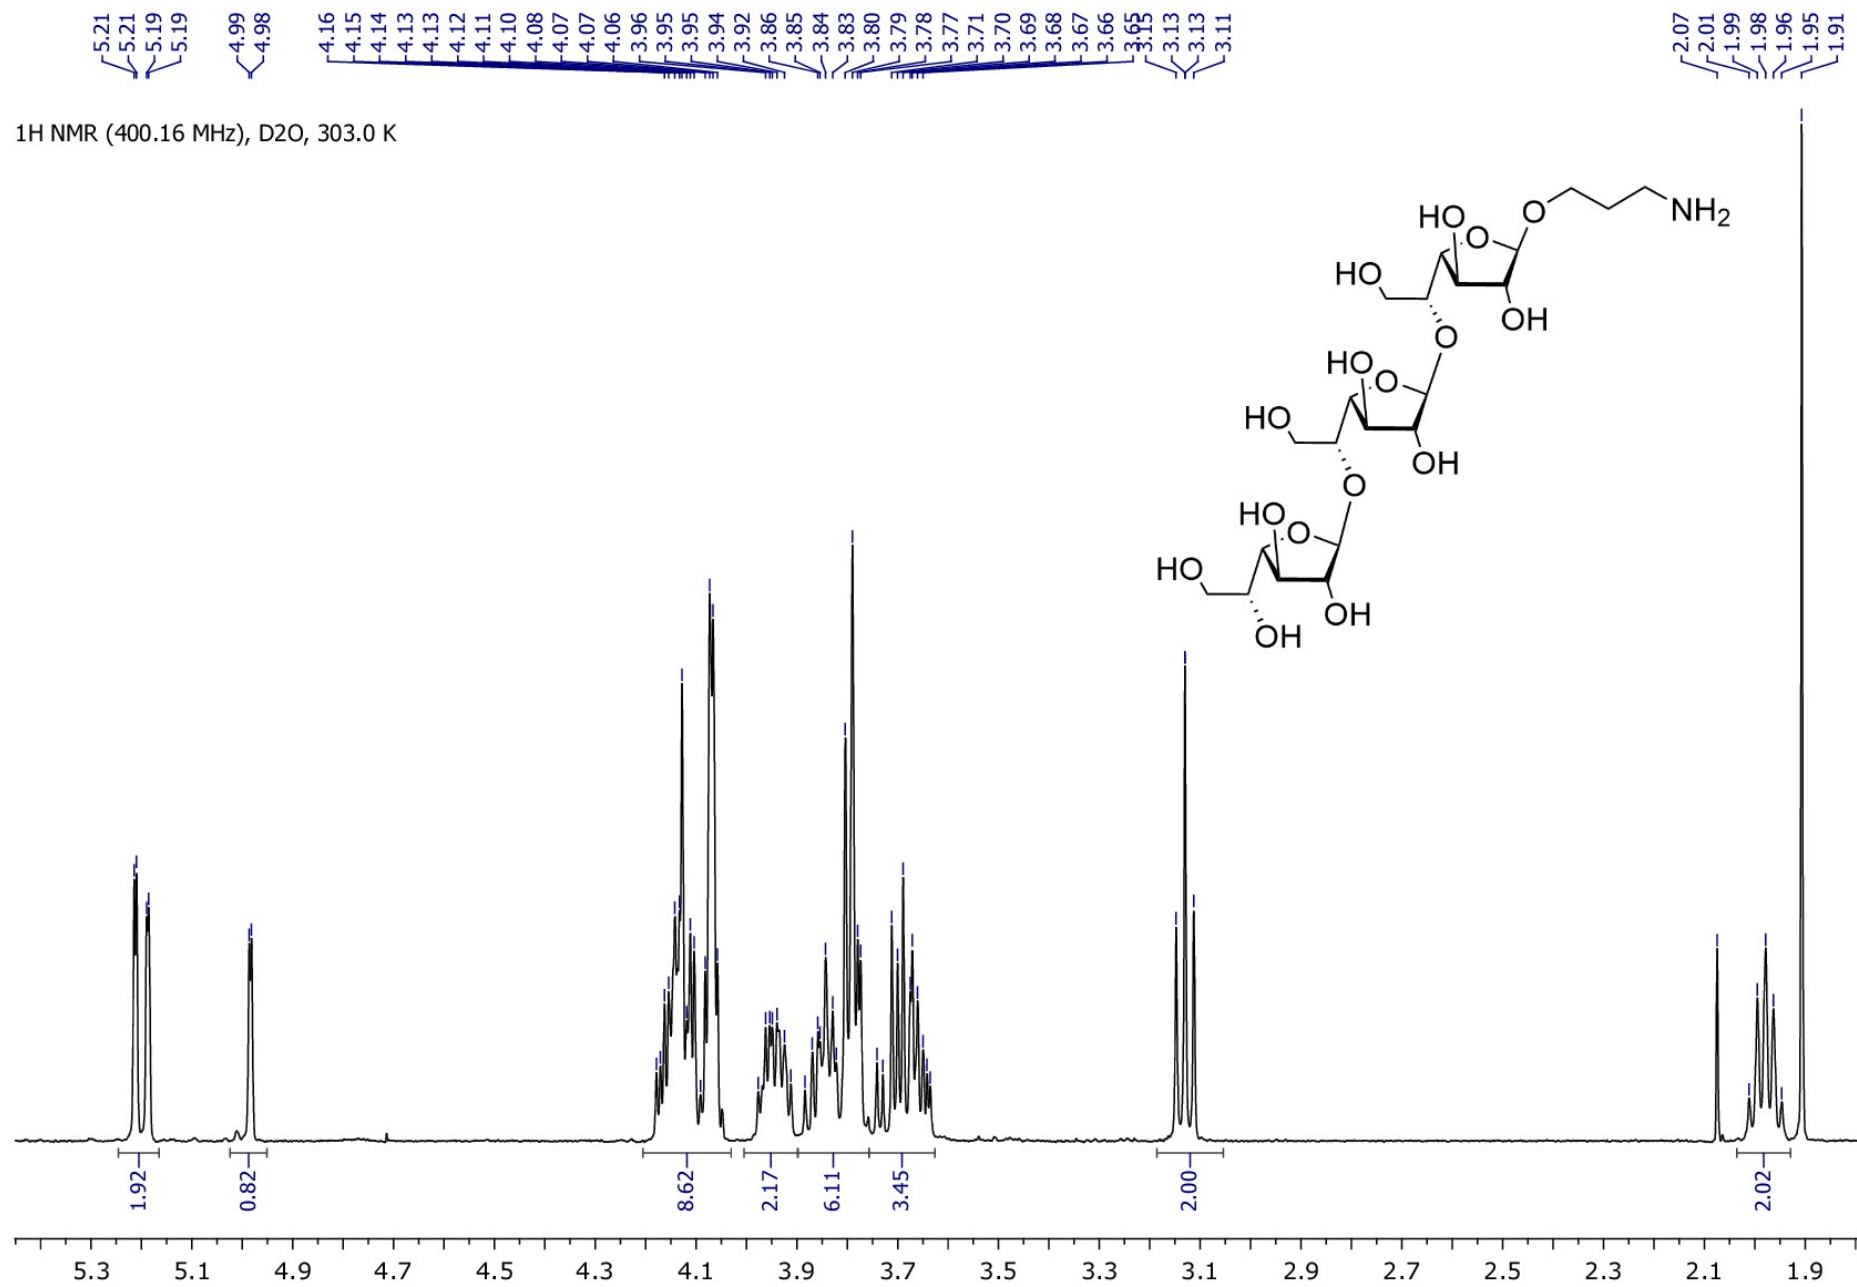

<sup>13</sup>C NMR (100.62 MHz), D<sub>2</sub>O, 303.0 K

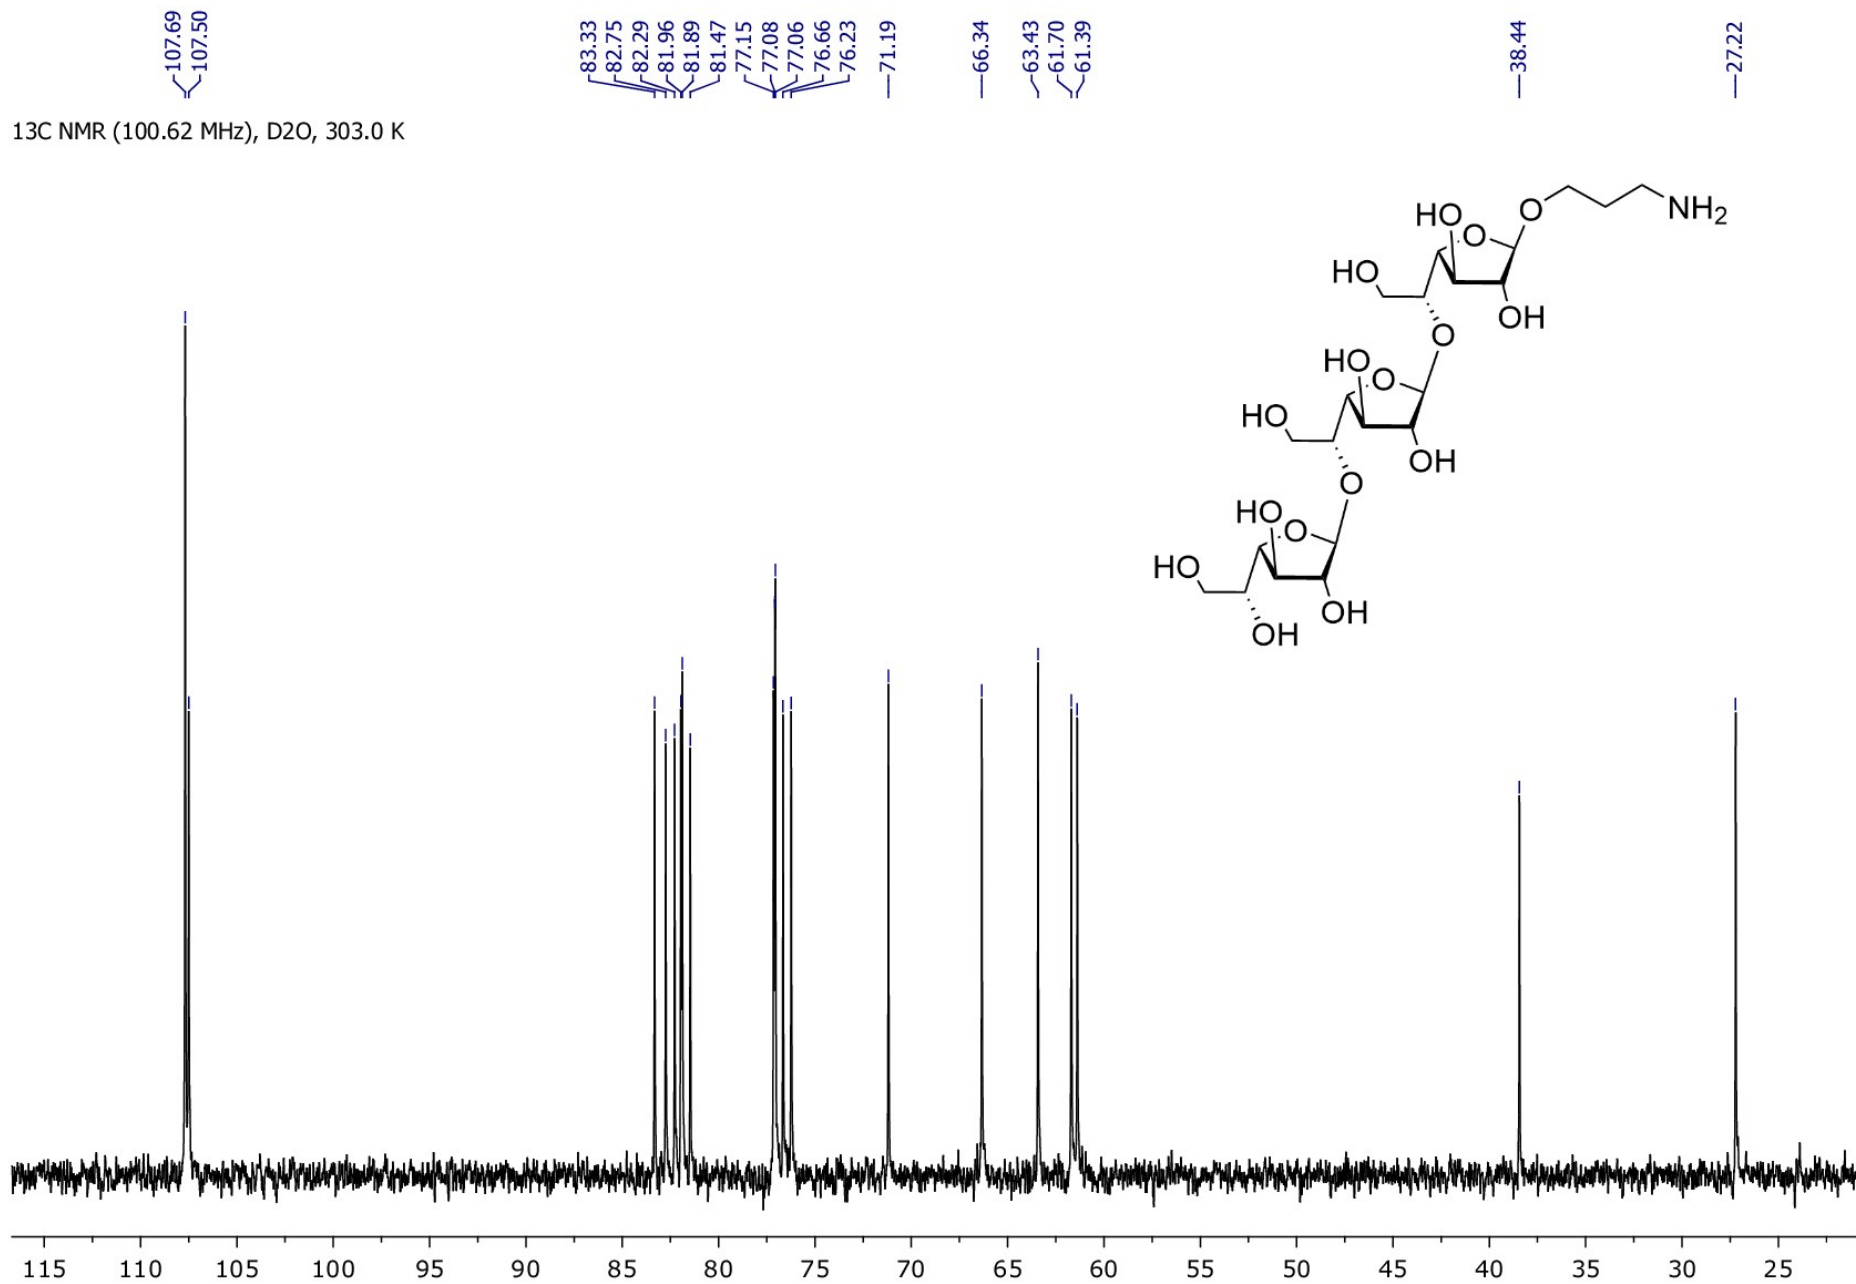

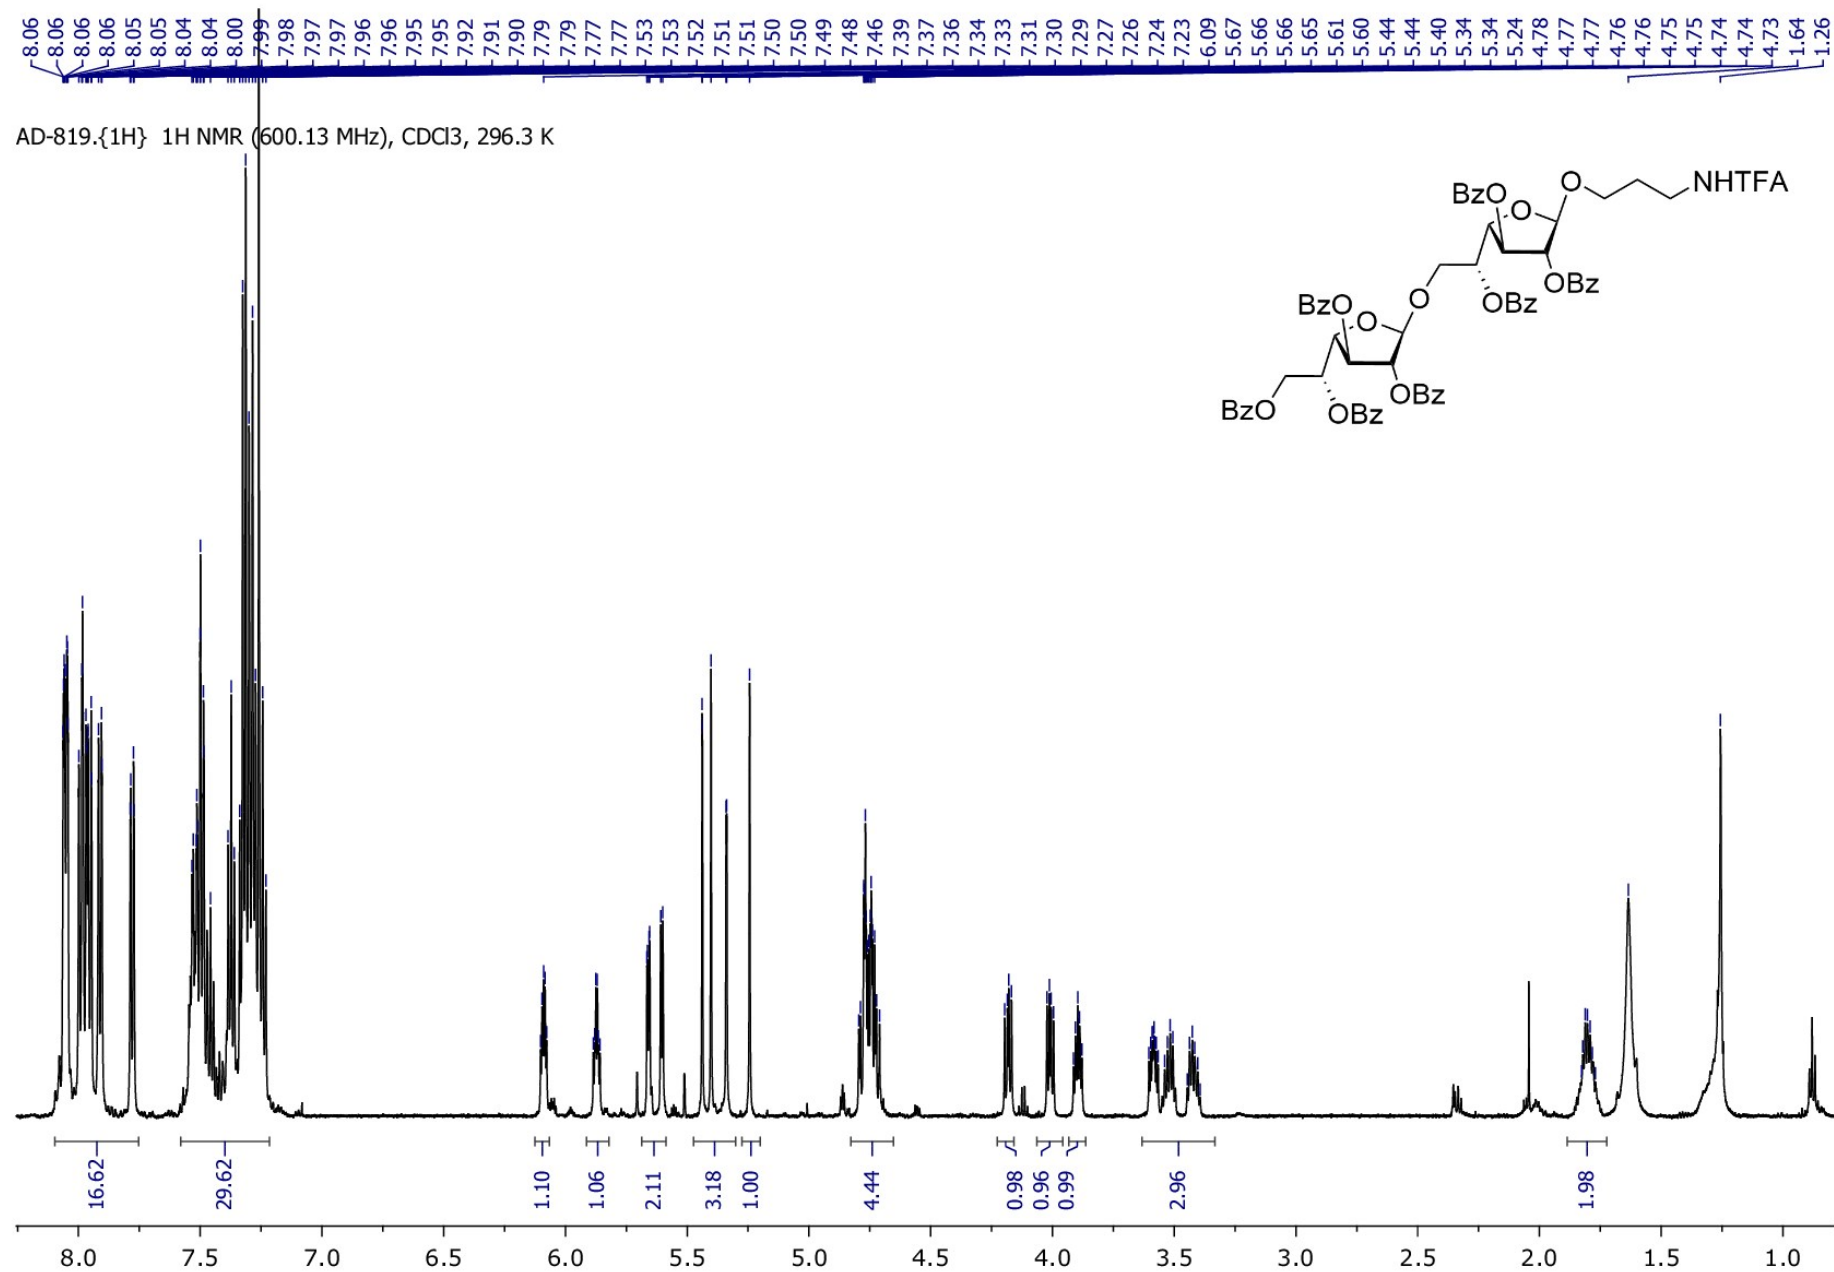

166.22  
165.97  
165.72  
165.70  
165.67  
165.63  
165.34  
133.58  
133.54  
133.48  
133.34  
133.24  
133.07  
129.96  
129.92  
129.85  
129.80  
129.73  
129.56  
129.51  
129.42  
128.87  
128.75  
128.51  
128.46  
128.44  
128.41  
128.36  
106.36  
105.86

AD-819-{13C} 13C NMR (150.92 MHz), CDCl3, 297.8 K

83.06  
81.96  
81.78  
81.34  
77.51  
77.23  
77.12  
77.02  
76.81  
70.78  
70.18  
66.64  
65.28  
63.67

37.97

27.99

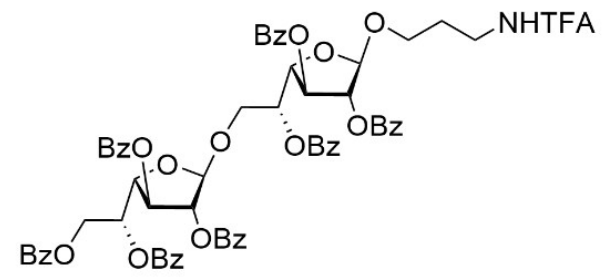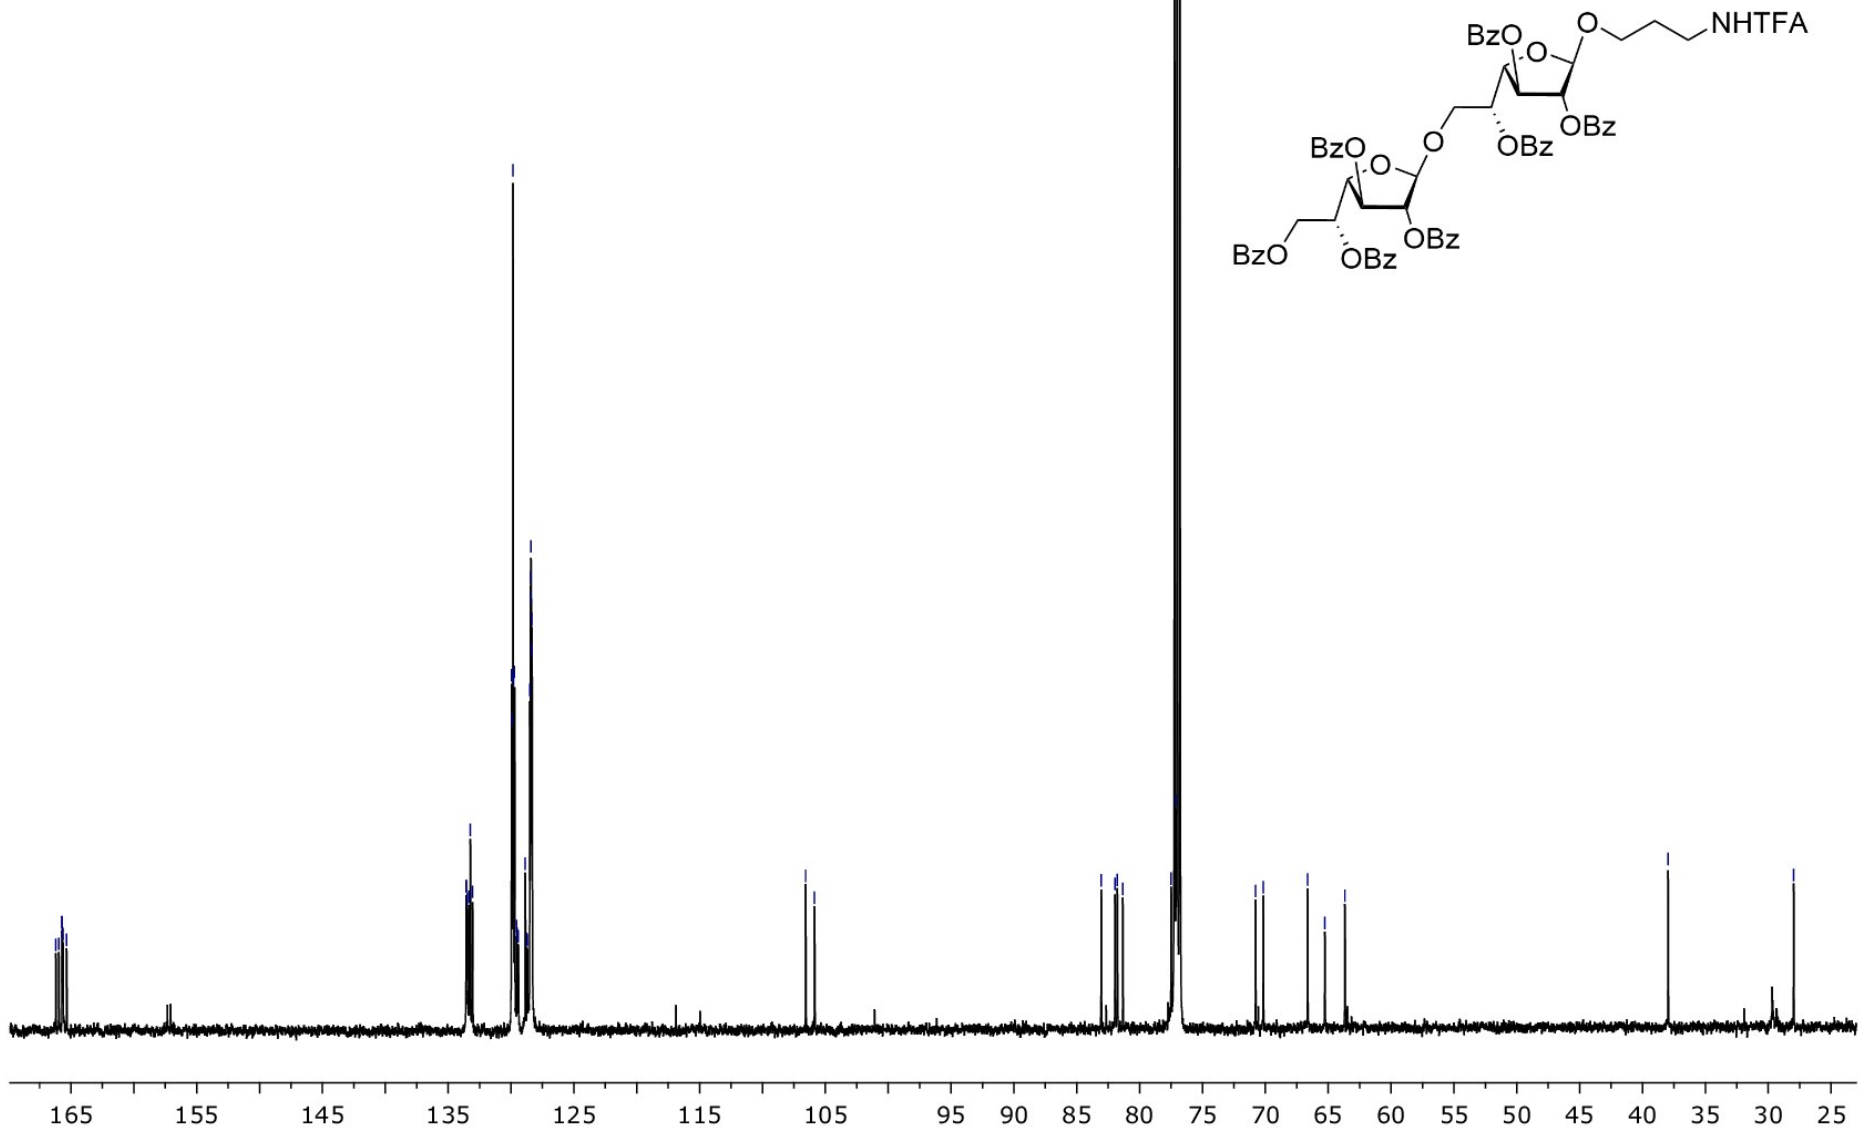

### 3-Aminopropyl $\beta$ -D-galactofuranosyl-(1 $\rightarrow$ 6)- $\beta$ -D-galactofuranoside 1

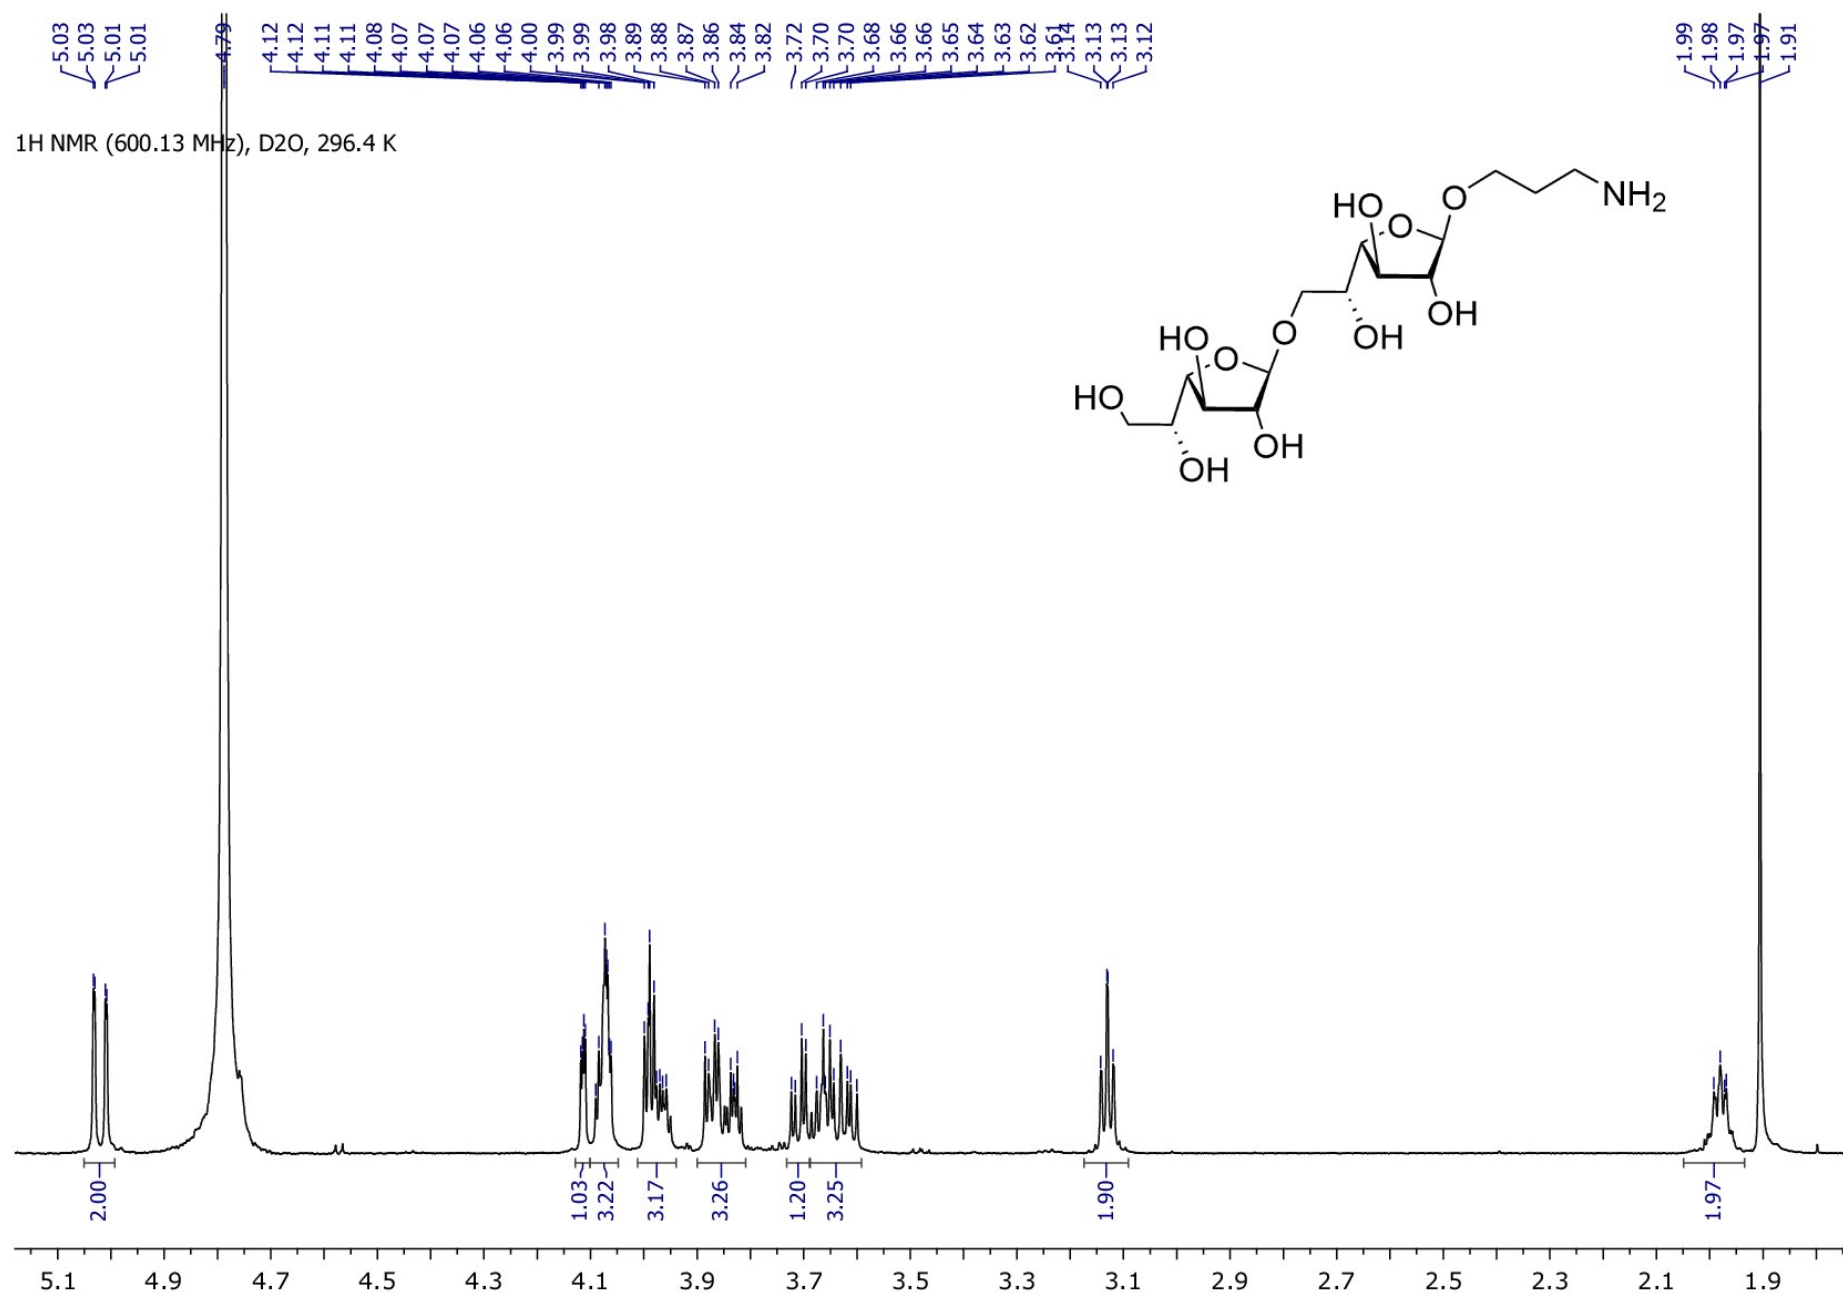

108.40  
107.68  
13C NMR (150.92 MHz), D2O, 298.1 K

84.04  
83.62  
81.58  
81.30  
77.40  
77.17  
71.45  
70.23  
69.58  
66.28  
63.30

38.44  
27.16  
23.86

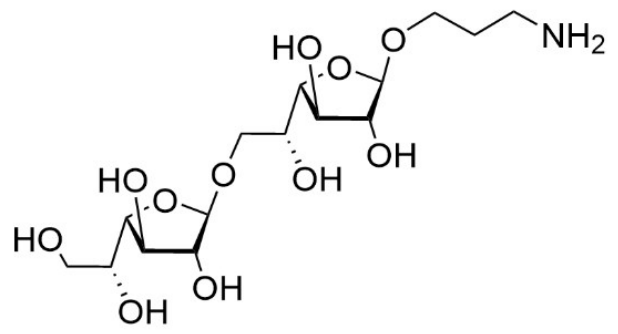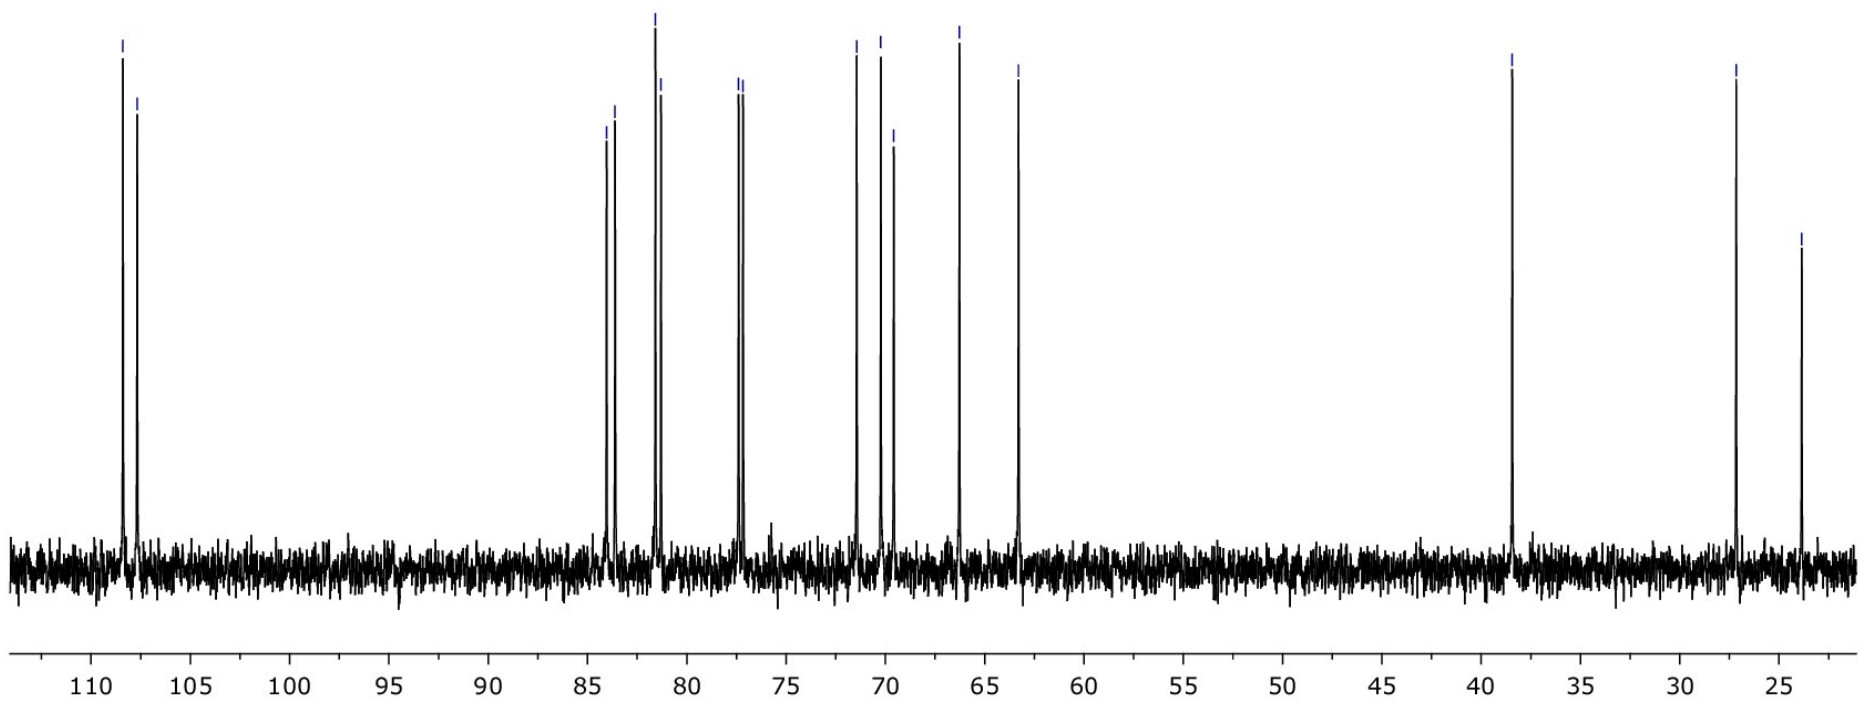



3-Trifluoroacetamidopropyl  
galactofuranoside 24

2,3,5-tri-*O*-benzoyl-6-*O*-(9-fluorenylmethoxycarbonyl)- $\beta$ -D-galactofuranosyl-(1 $\rightarrow$ 5)-2,3,6-tri-*O*-benzoyl- $\beta$ -D-galactofuranoside 24

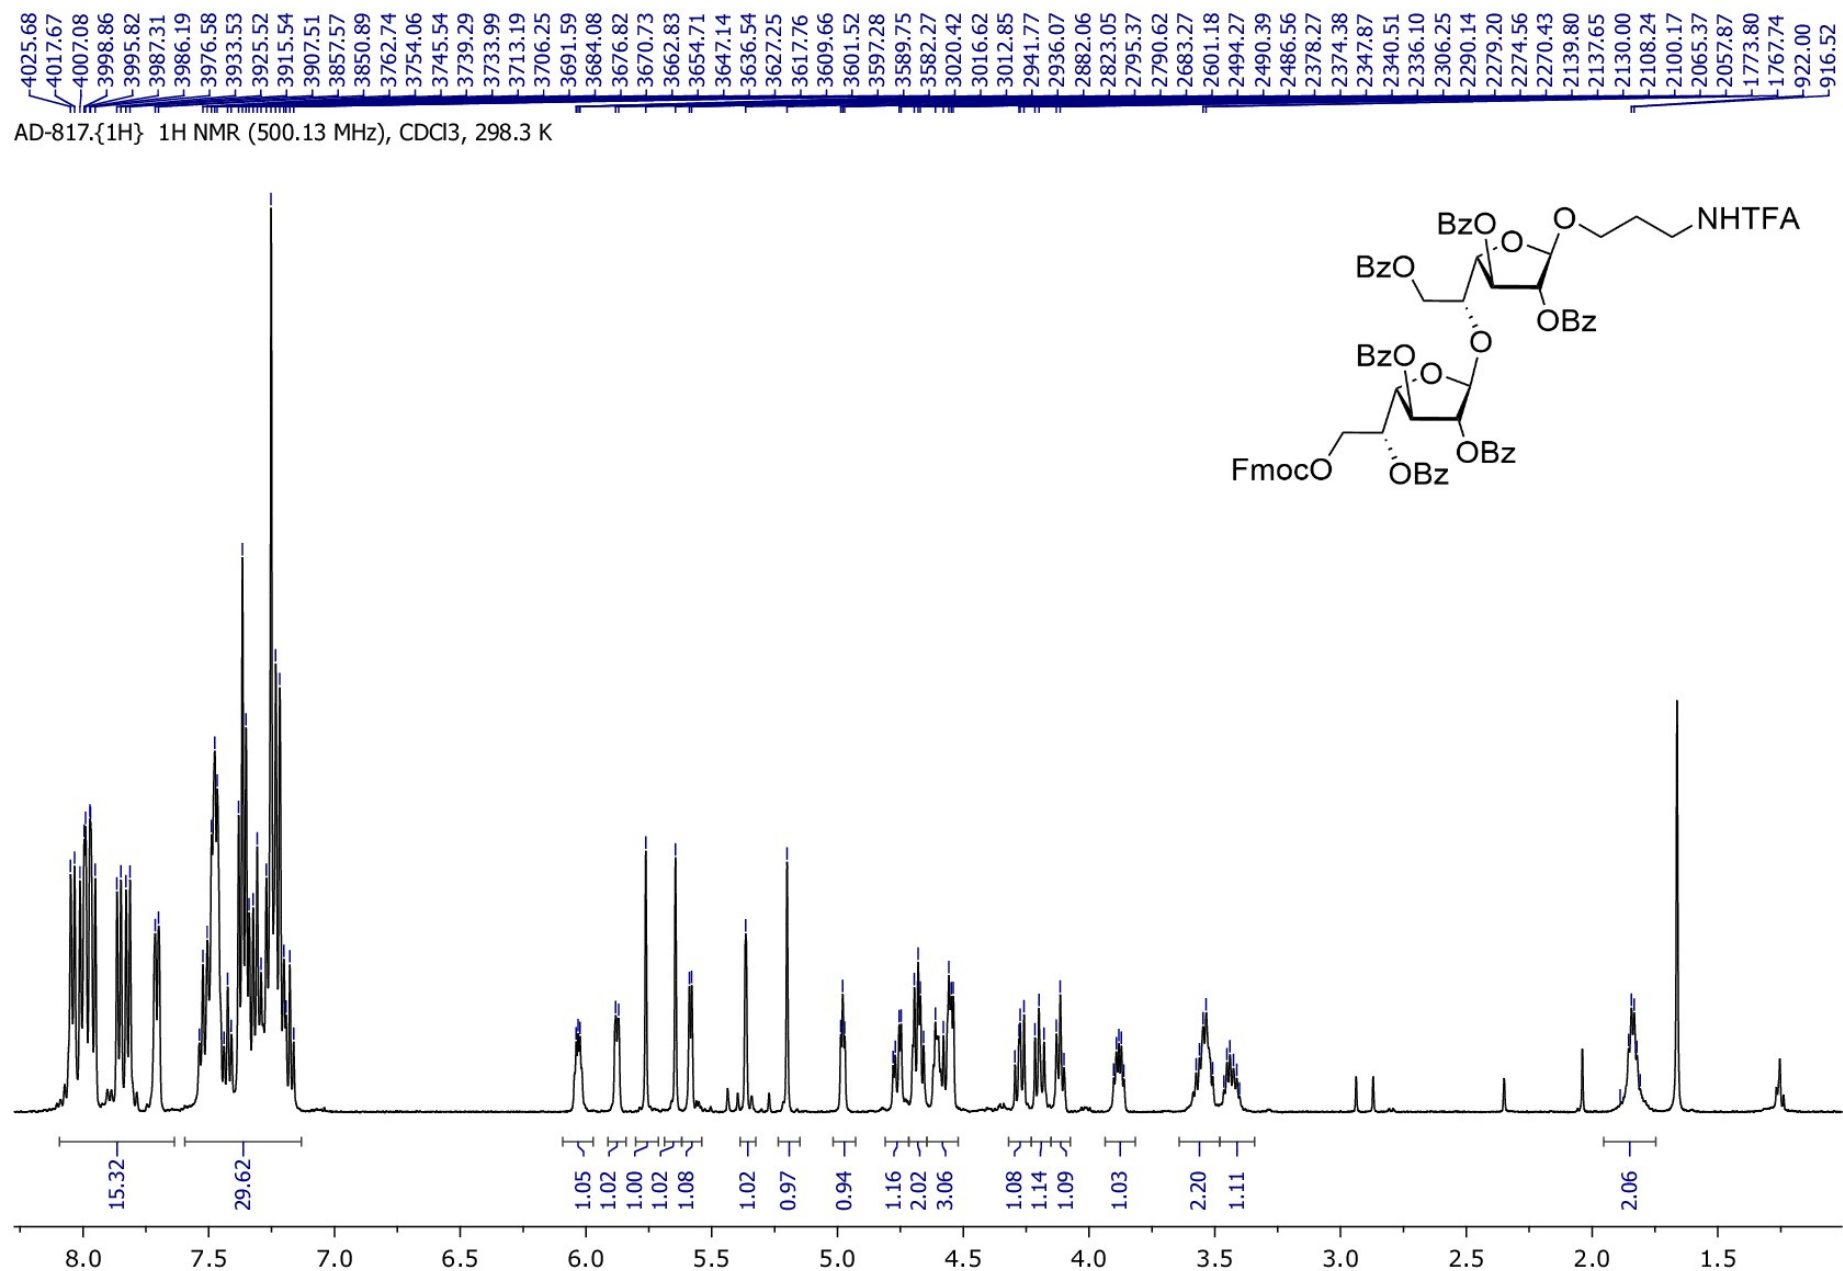

166.18  
165.96  
165.72  
165.59  
165.52  
165.25  
154.83

143.34  
143.17  
141.17  
130.02  
129.82  
129.78  
129.66  
128.61  
128.52  
128.39  
128.35  
119.92

106.14  
105.54

82.81  
82.19  
81.97  
81.77  
77.72  
77.28  
77.03  
76.77  
76.53  
73.39  
70.17  
66.58  
66.47  
64.23

46.53

38.08

28.04

AD-817-<sup>13</sup>C} <sup>13</sup>C NMR (125.77 MHz), CDCl<sub>3</sub>, 298.4 K

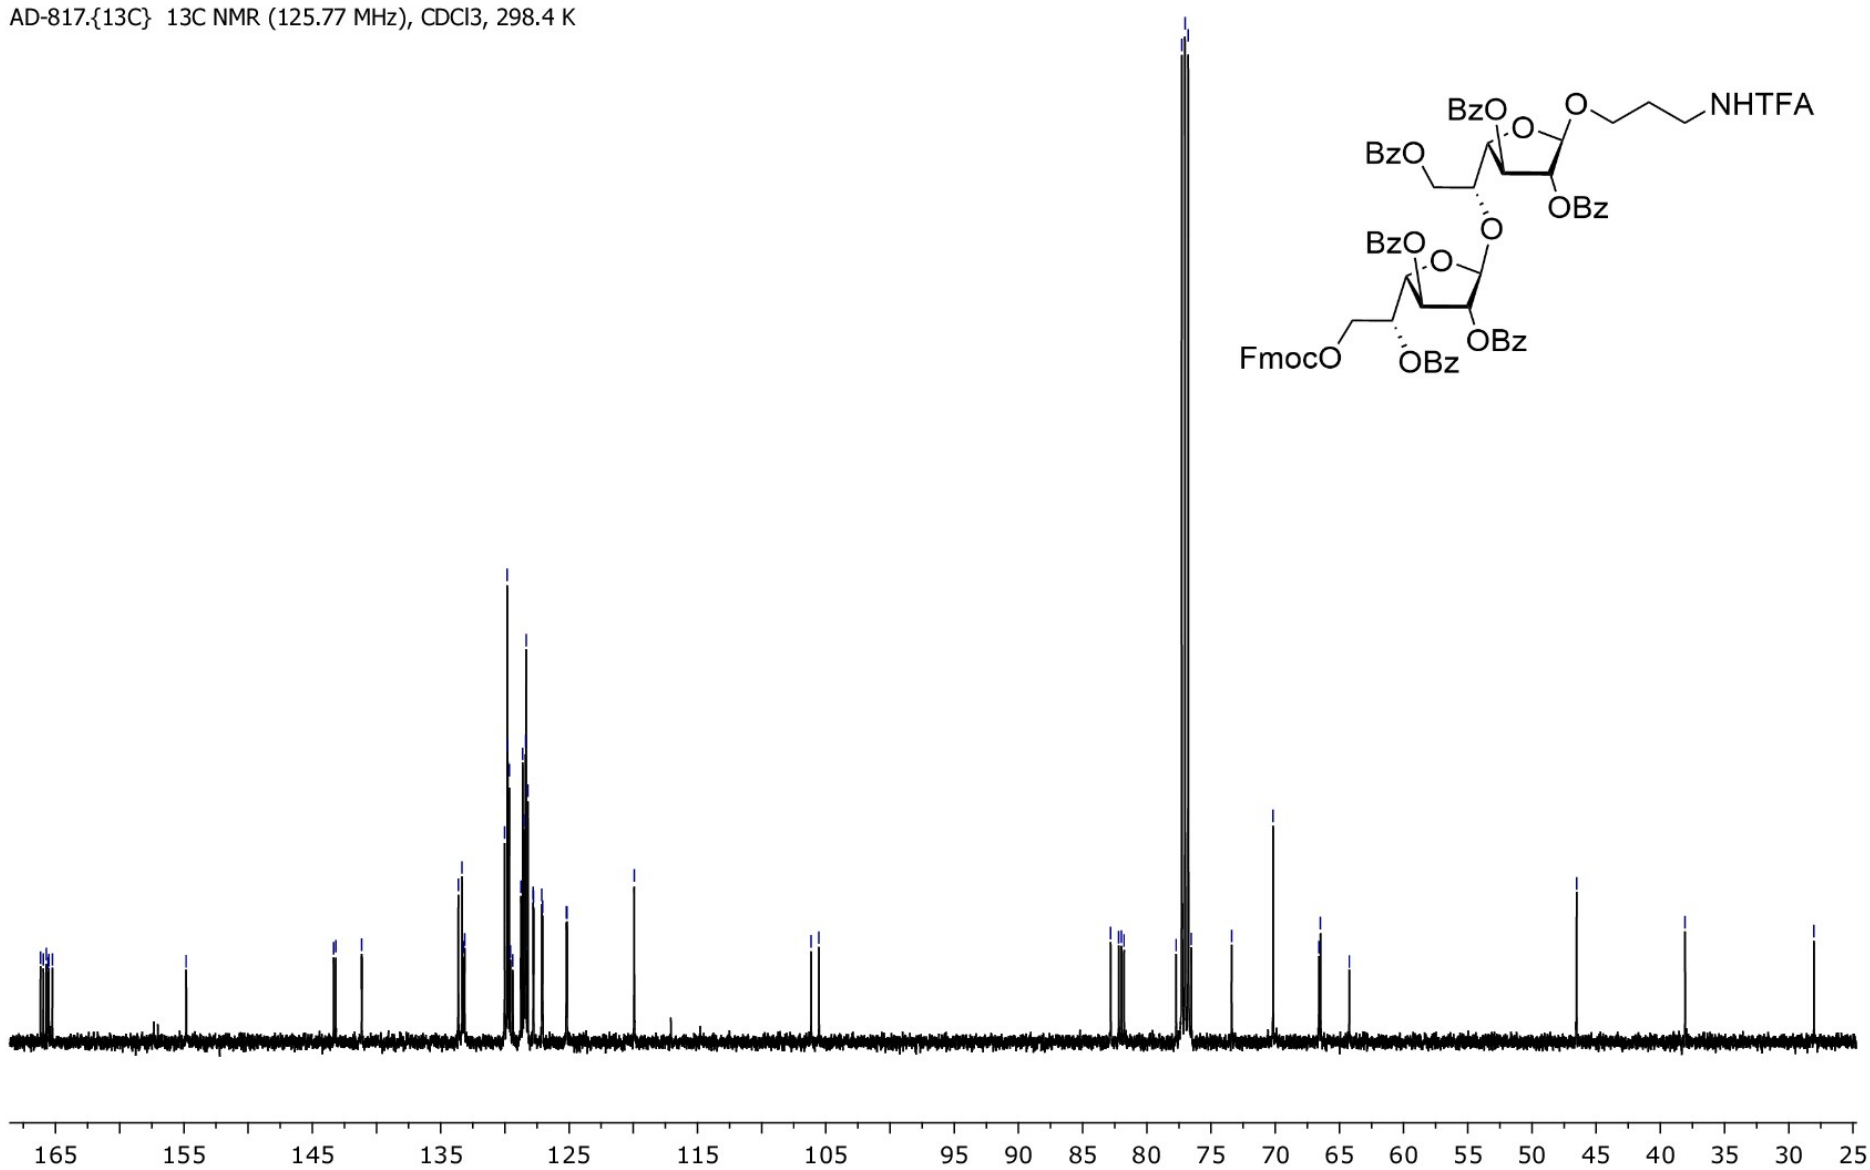

### 3-Aminopropyl β-D-galactofuranosyl-(1→5)-β-D-galactofuranoside 3

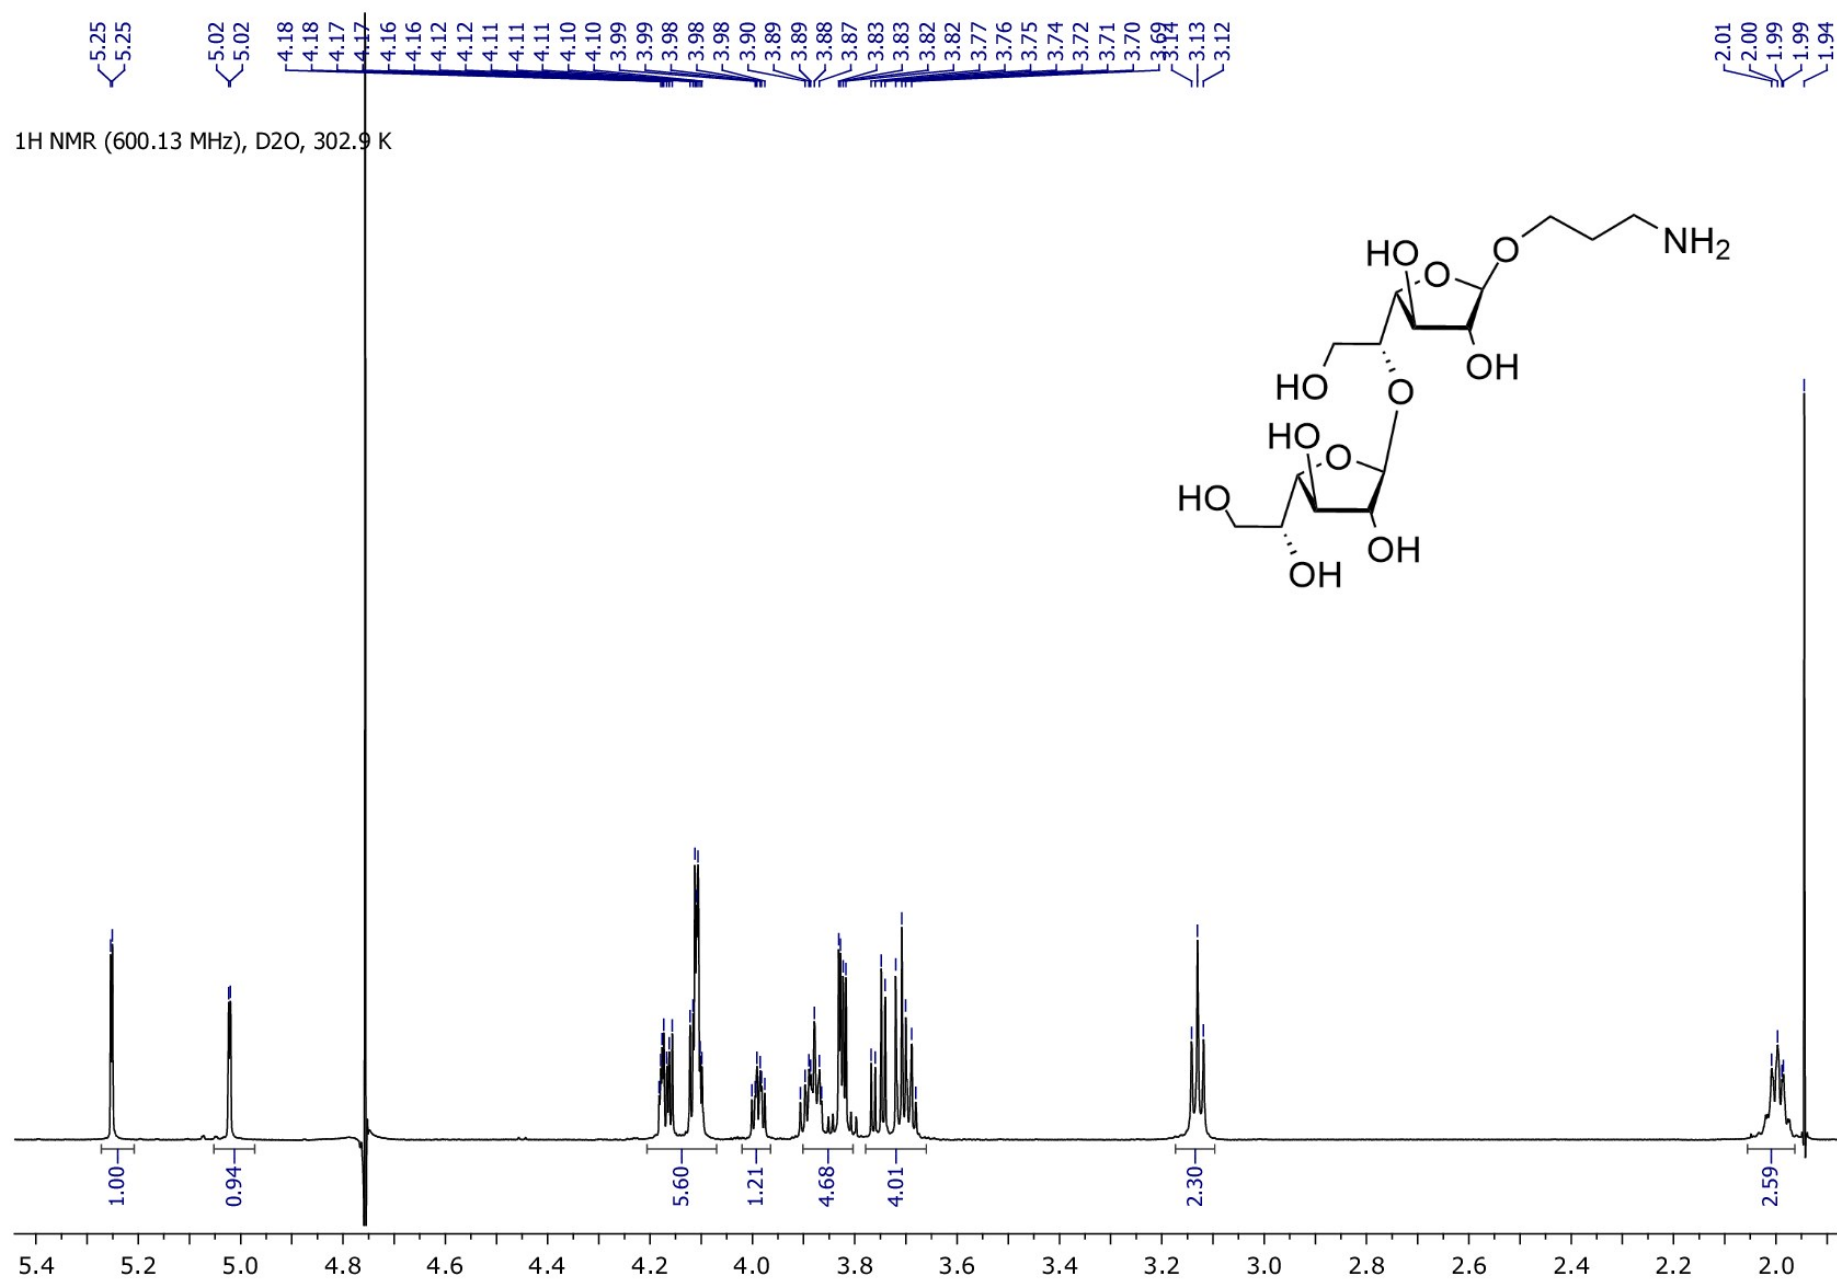

<sup>13</sup>C NMR (150.92 MHz), D<sub>2</sub>O, 302.9 K

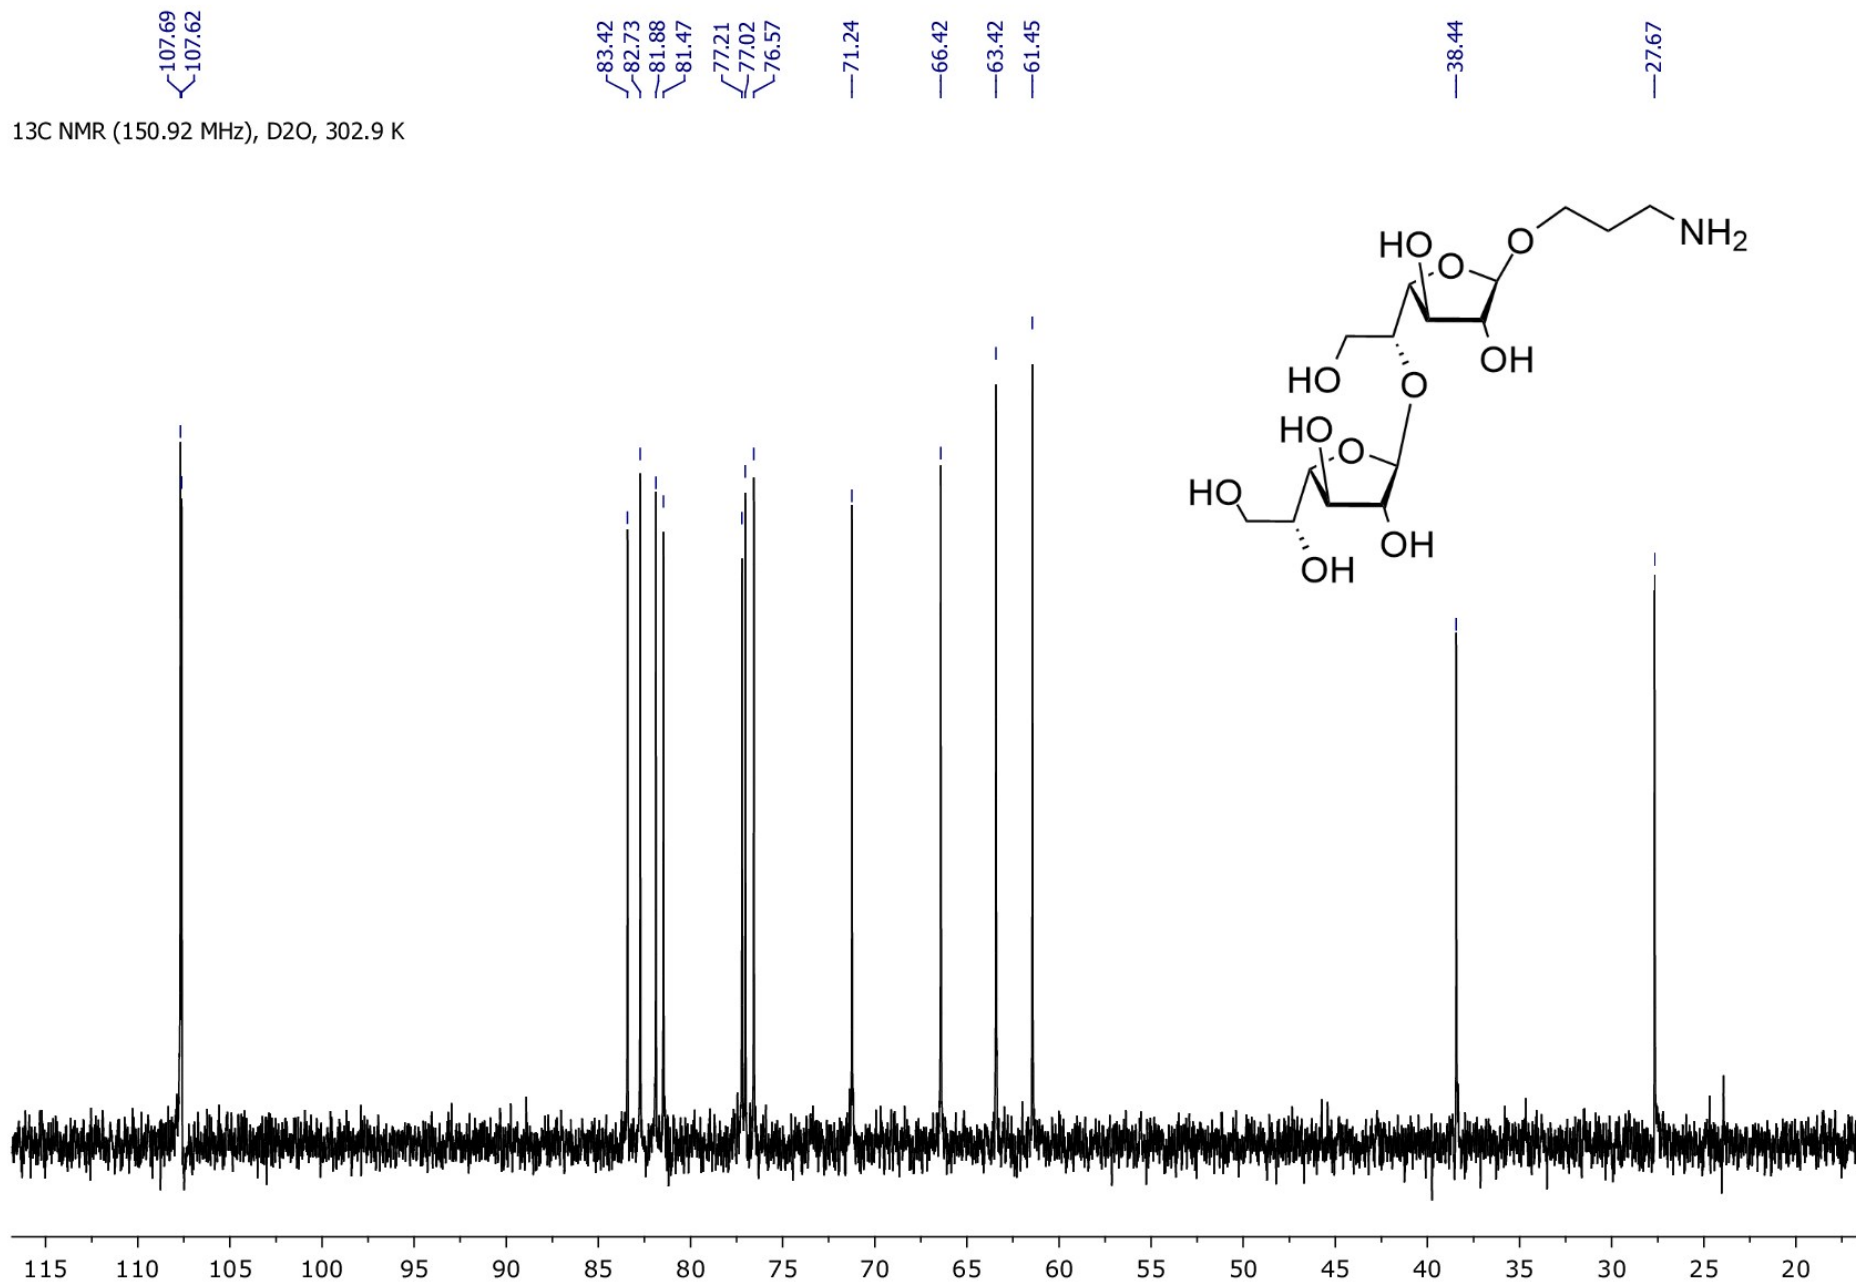

### 3-Trifluoroacetamidopropyl 2,3,5-tri-*O*-benzoyl- $\beta$ -D-galactofuranosyl-(1 $\rightarrow$ 5)-2,3,5-tri-*O*-benzoyl- $\beta$ -D-galactofuranoside 25

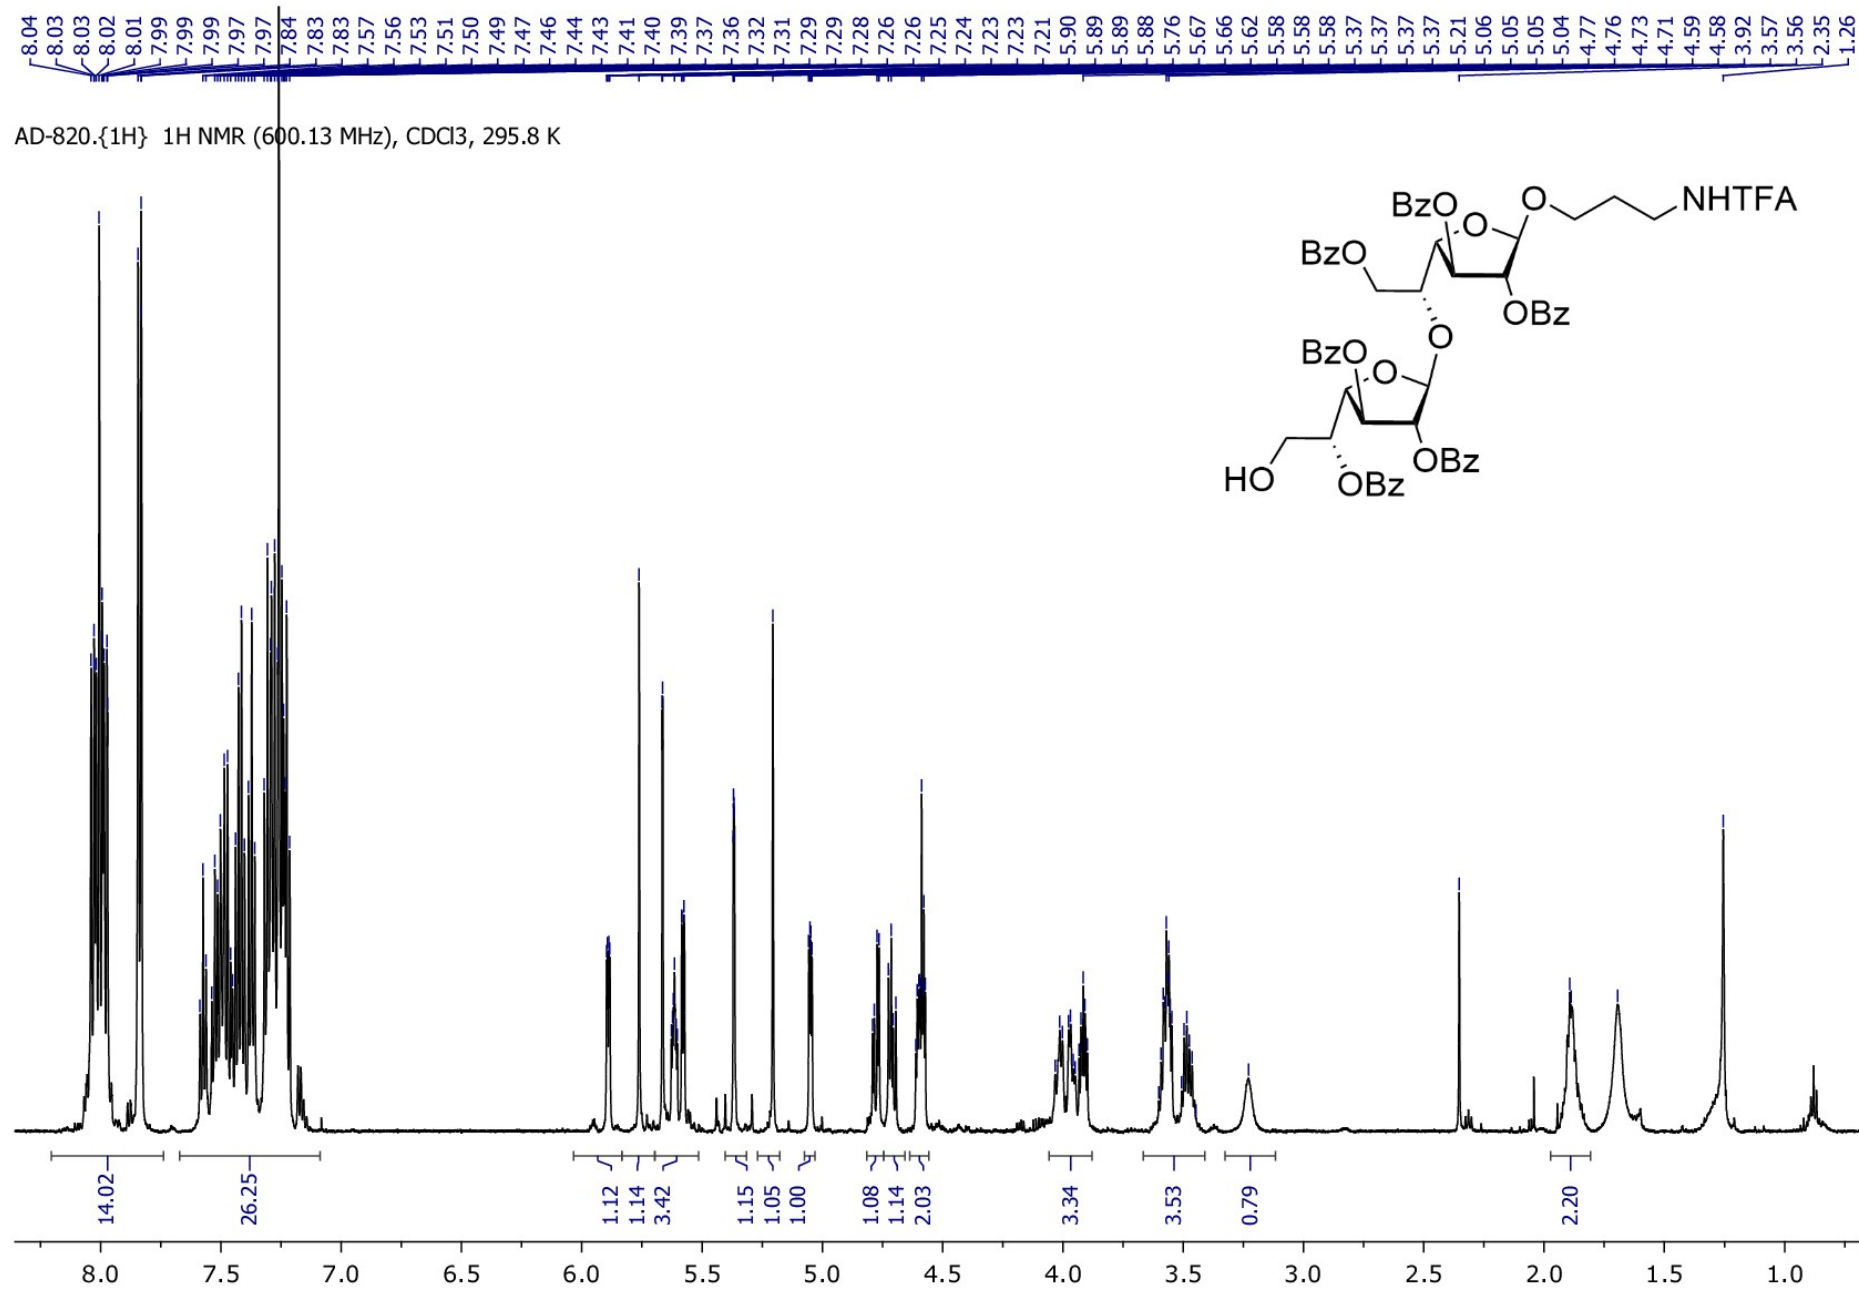

166.29  
 166.23  
 166.03  
 165.63  
 165.31  
 133.88  
 133.67  
 133.35  
 133.17  
 129.91  
 129.89  
 129.84  
 129.79  
 129.65  
 128.85  
 128.76  
 128.61  
 128.41  
 128.38  
 128.35  
 128.22

106.24  
 105.86

82.74  
 82.35  
 82.02  
 81.63  
 77.69  
 77.21  
 77.02  
 76.81  
 73.66  
 72.97  
 66.42  
 64.43  
 61.34

38.08

28.11

AD-820-<sup>13</sup>C} 13C NMR (150.92 MHz), CDCl<sub>3</sub>, 297.2 K

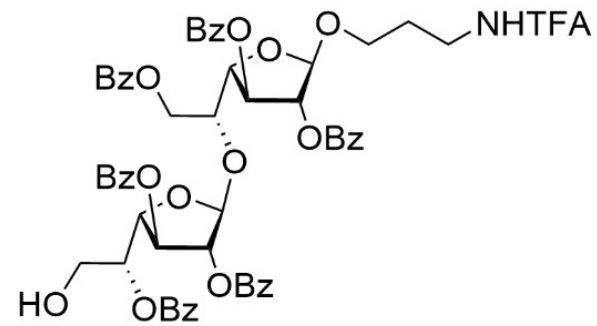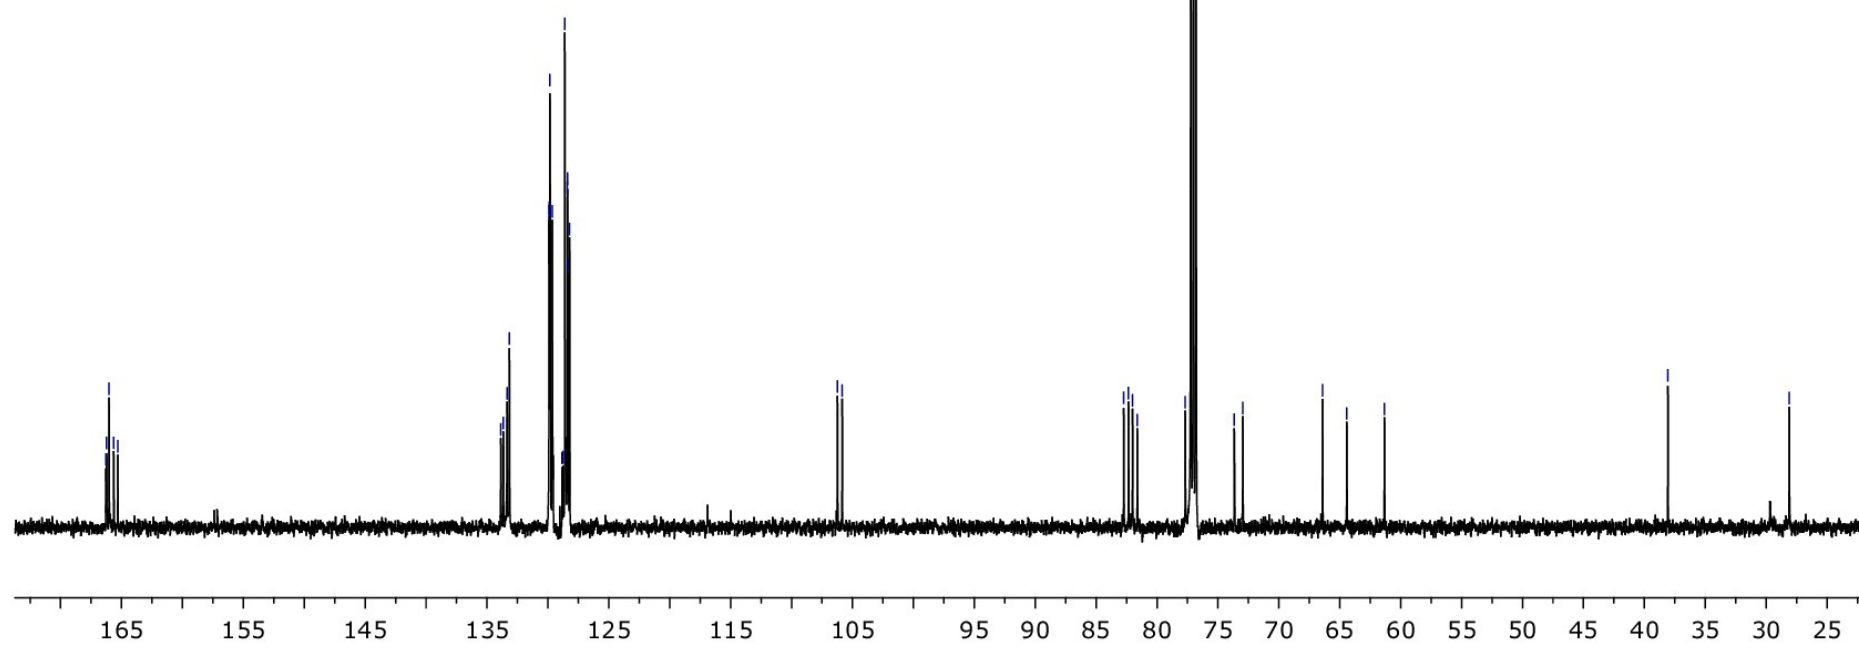

**3-Trifluoroacetamidopropyl 2,3,5,6-tetra-*O*-benzoyl- $\beta$ -D-galactofuranosyl-(1 $\rightarrow$ 6)-2,3,5-tri-*O*-benzoyl- $\beta$ -D-galactofuranosyl-(1 $\rightarrow$ 5)-2,3,6-tri-*O*-benzoyl- $\beta$ -D-galactofuranoside 26**

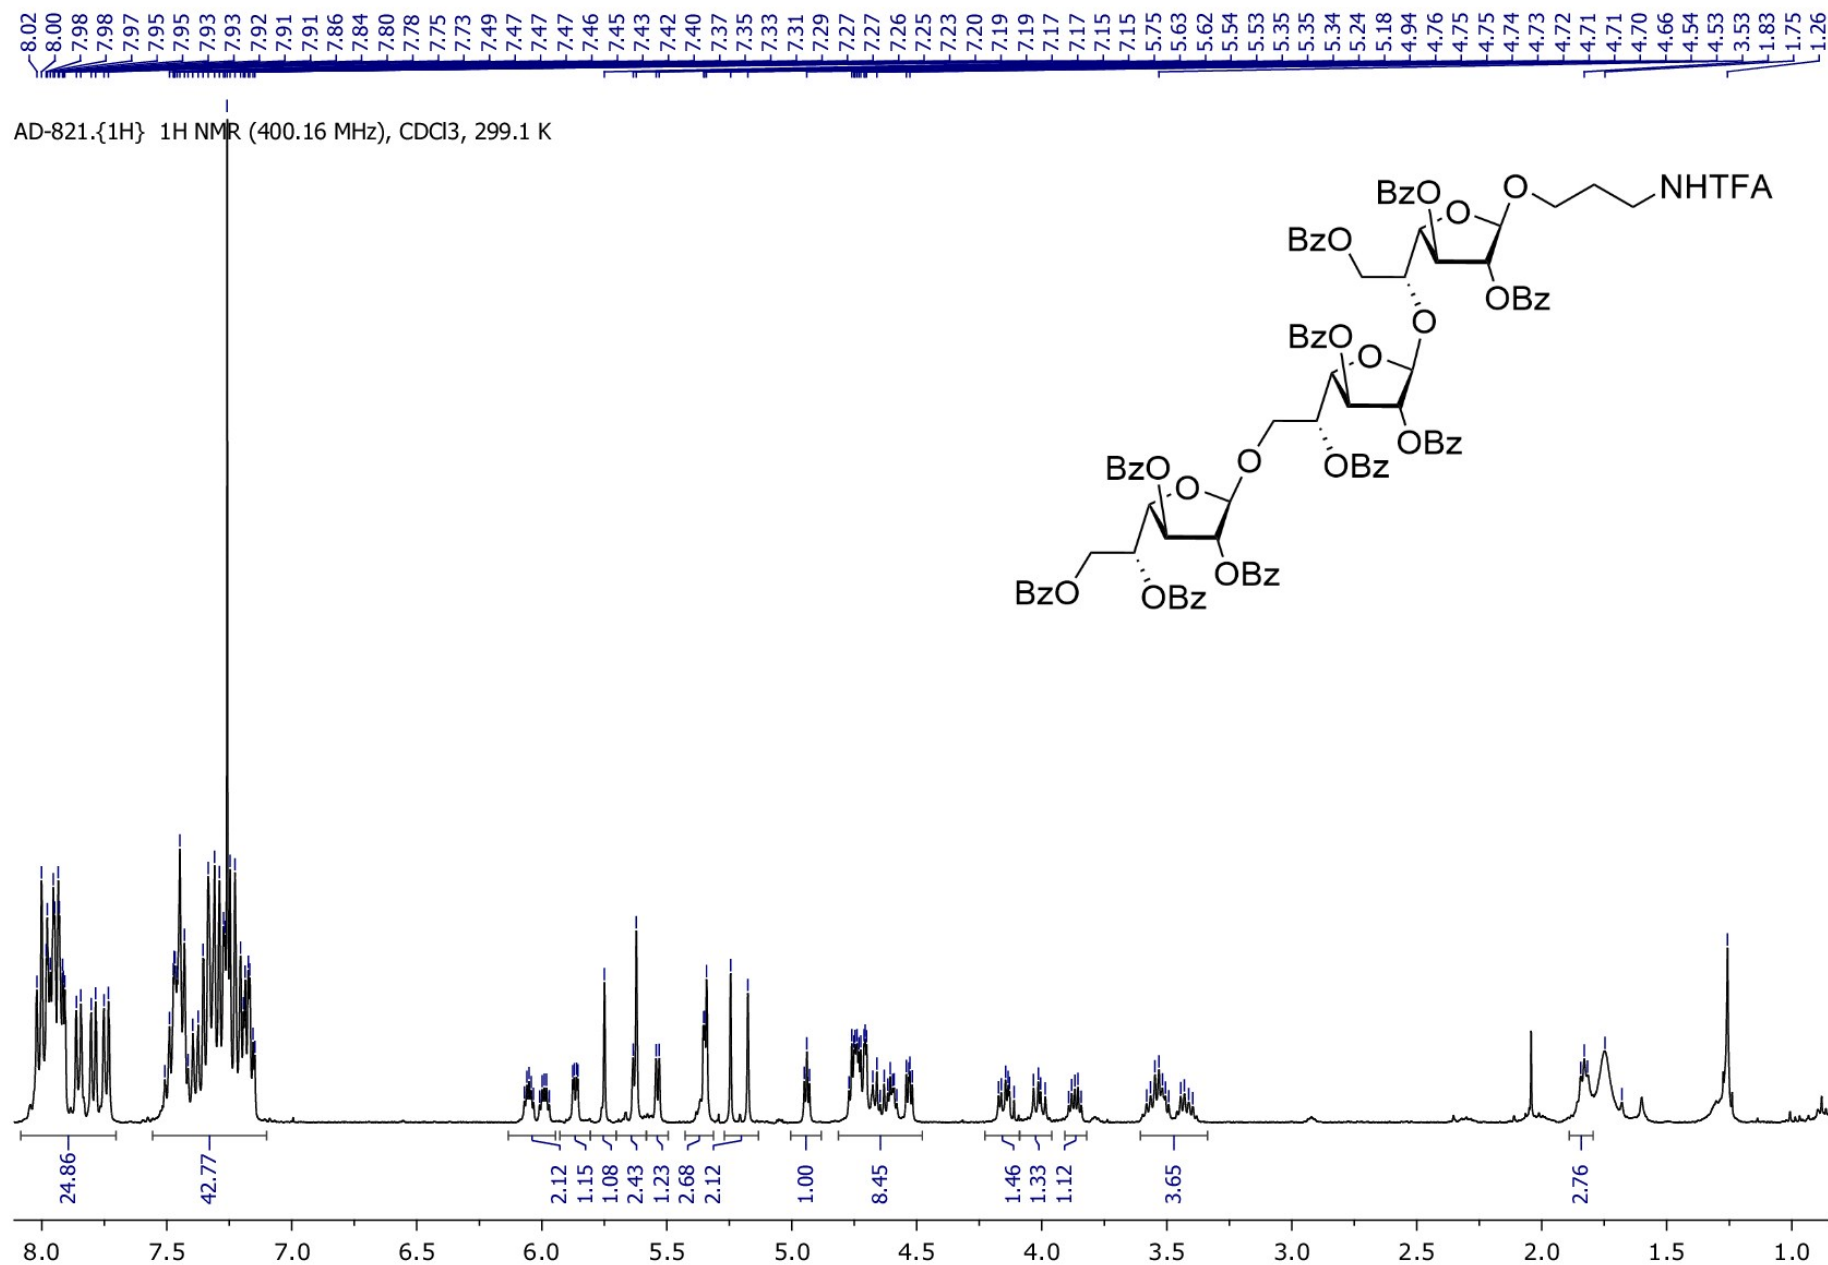

166.17  
166.09  
165.88  
165.75  
165.62  
165.54  
165.25  
165.13  
133.61  
133.54  
133.27  
133.22  
133.11  
132.96  
129.89  
129.78  
129.74  
129.69  
129.66  
129.60  
128.88  
128.86  
128.84  
128.57  
128.48  
128.37  
128.32  
128.28  
128.16  
106.61  
105.46

AD-821- $\{^{13}\text{C}\}$  13C NMR (100.63 MHz), CDCl<sub>3</sub>, 299.0 K

82.84  
82.74  
81.95  
81.88  
77.77  
77.76  
77.34  
77.22  
77.02  
76.70  
76.48  
73.17  
71.75  
70.42  
67.43  
66.41  
64.25  
63.82

38.08

28.05

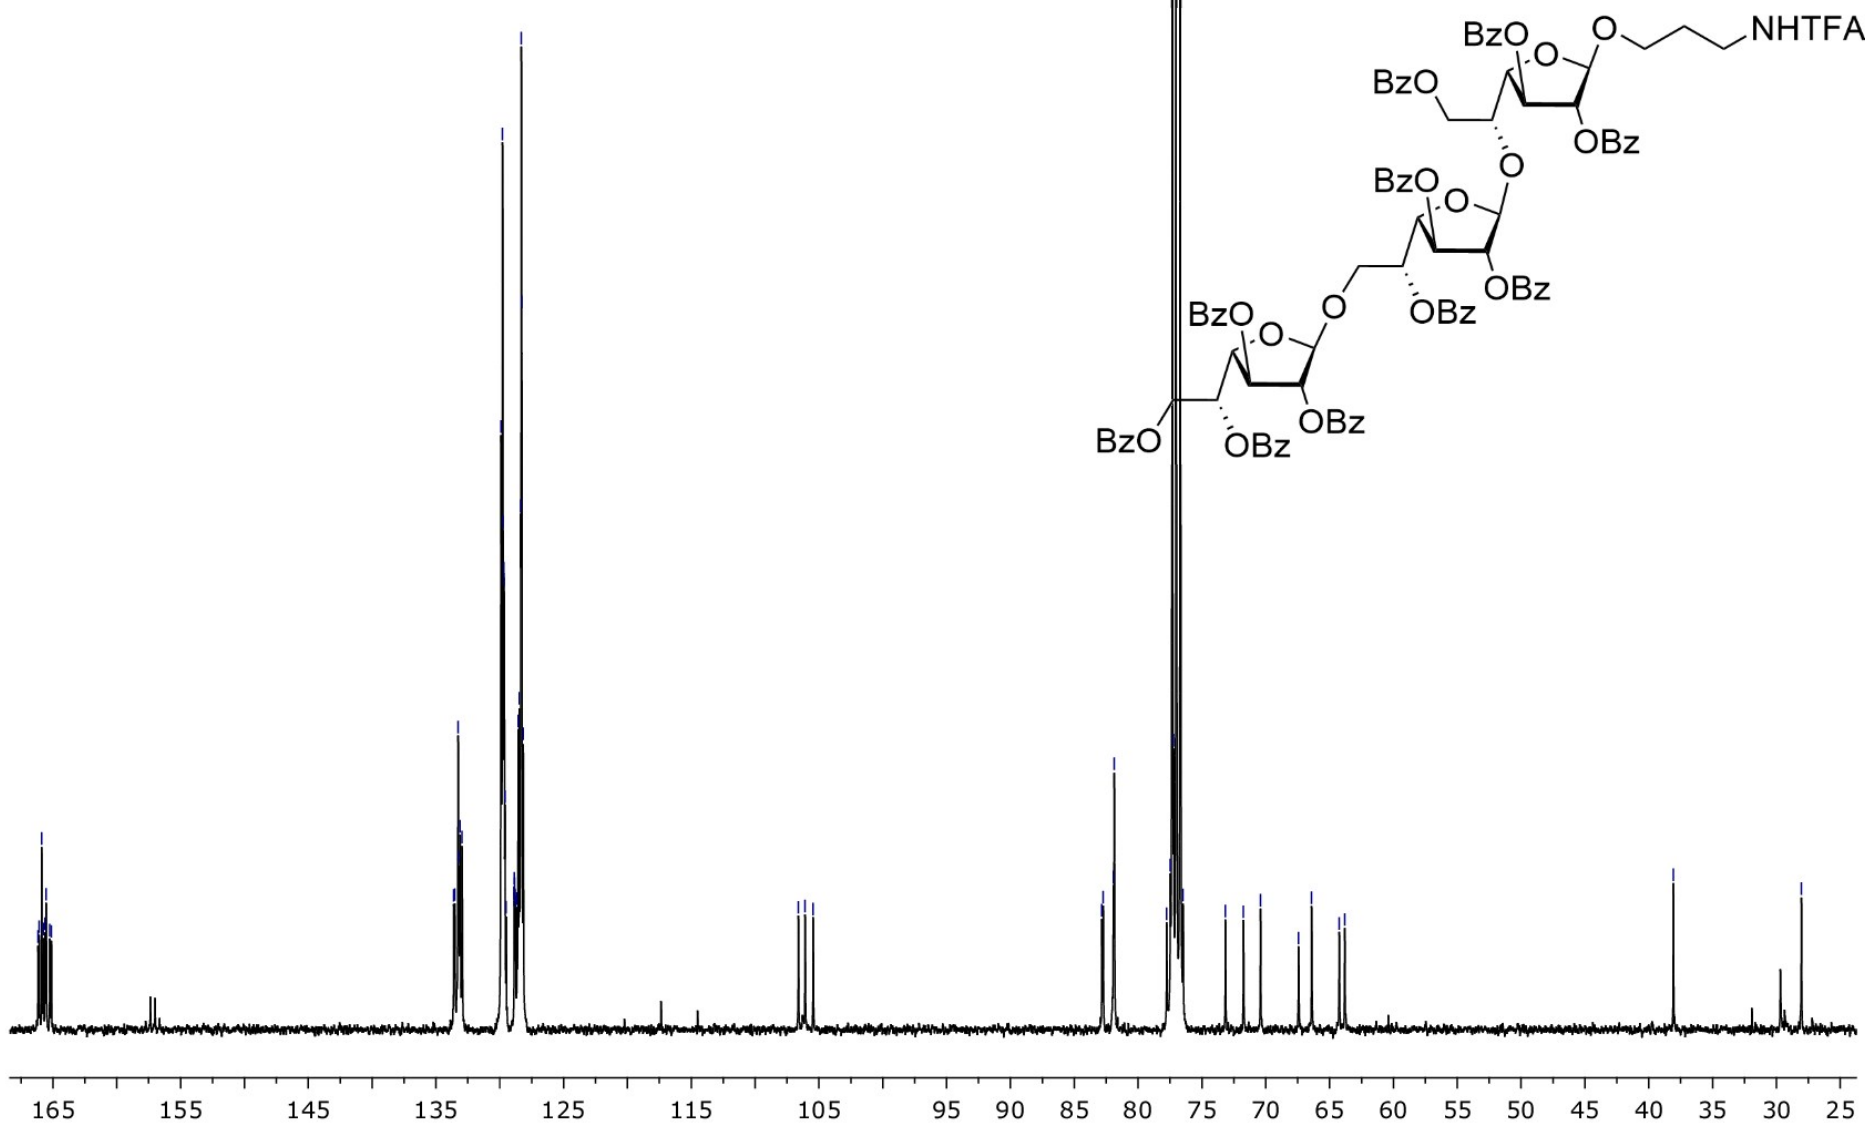





13C NMR (125.76 MHz), D2O, 298.7 K

108.49  
107.69  
107.51  
83.67  
83.56  
82.83  
81.83  
81.59  
81.44  
81.33  
77.37  
77.28  
77.08  
76.48  
71.45  
70.16  
69.89  
66.31  
63.34  
61.35

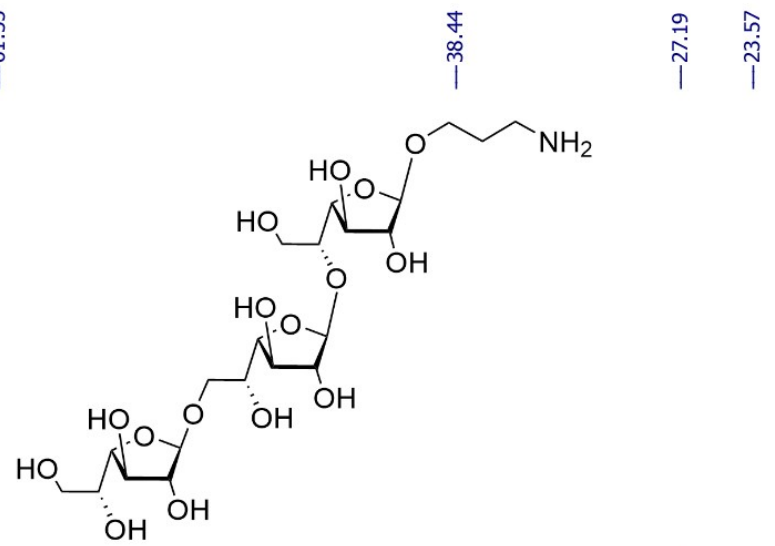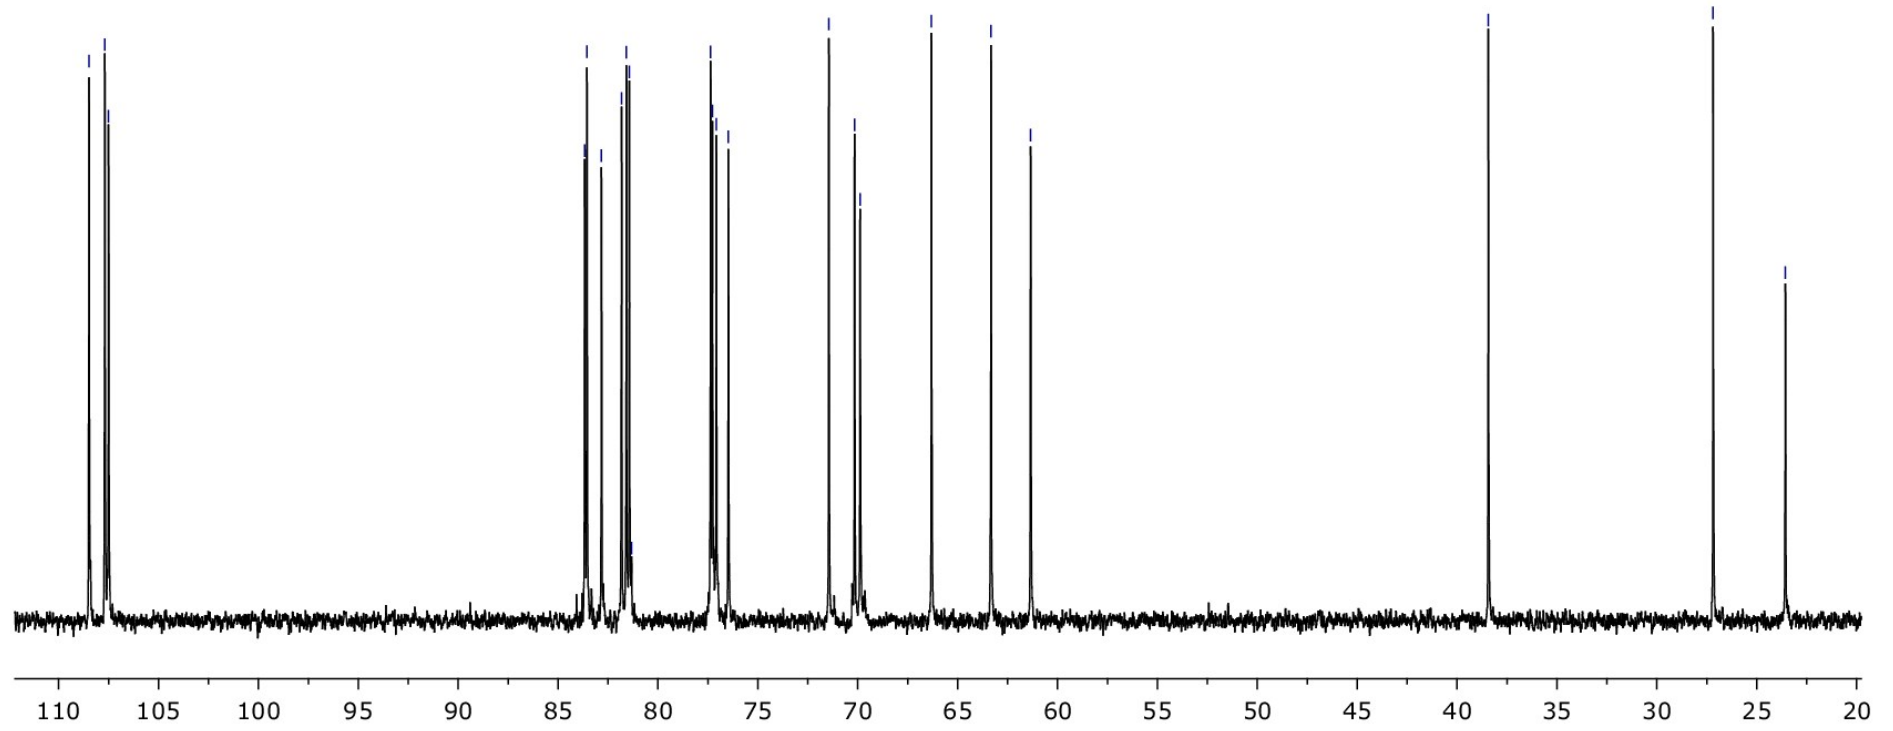

### 3-Trifluoroacetamidopropyl 2,3,5,6-tetra-*O*-benzoyl- $\beta$ -D-galactofuranosyl-(1 $\rightarrow$ 3)-2-*O*-benzoyl-4,6-di-*O*-benzyl- $\alpha$ -D-mannopyranoside 28

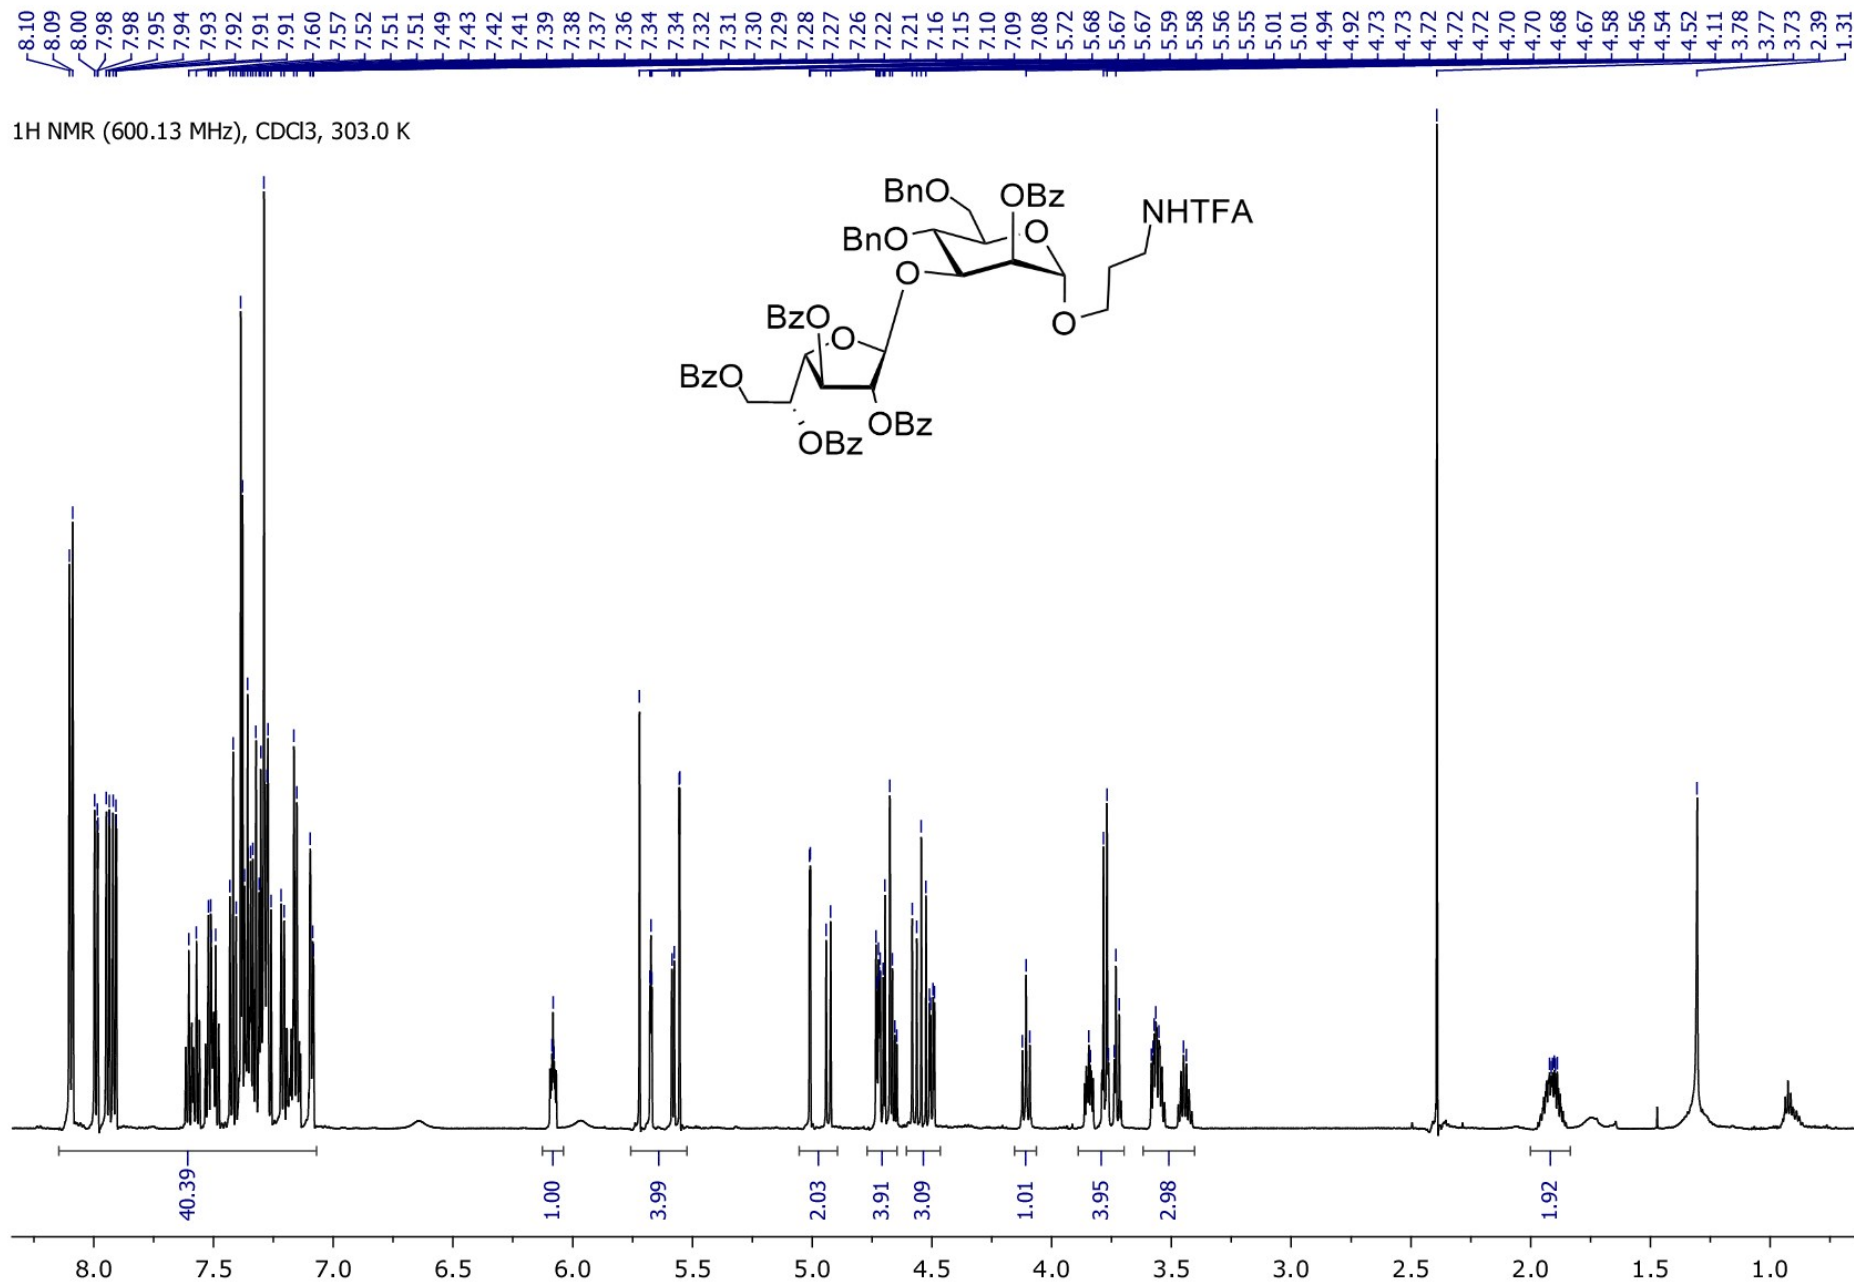

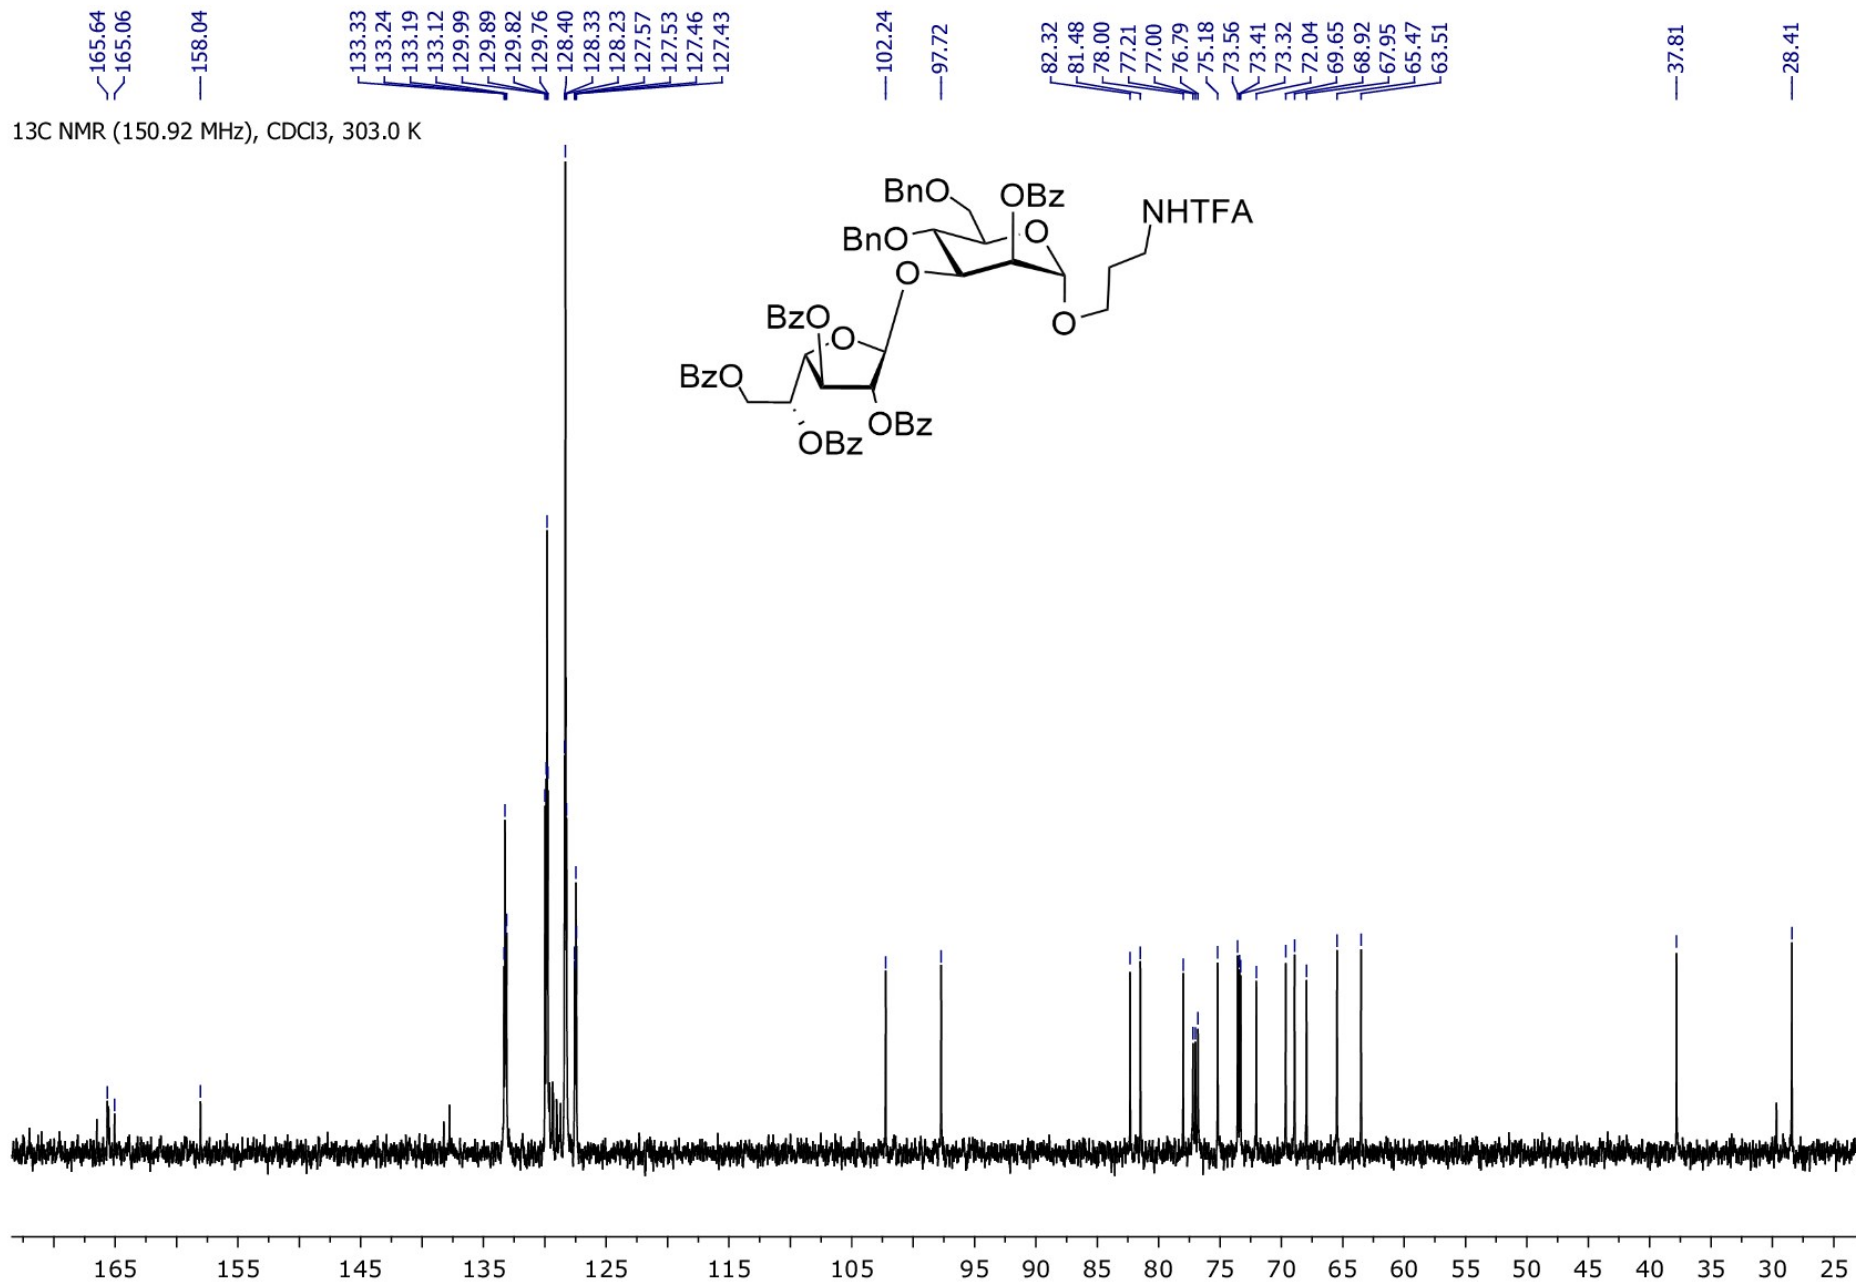

### 3-Aminopropyl $\beta$ -D-galactofuranosyl-(1 $\rightarrow$ 3)- $\alpha$ -D-mannopyranoside 5

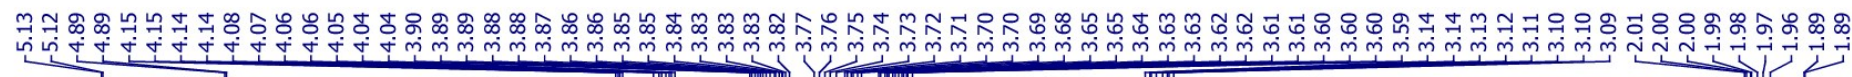

$^1\text{H}$  NMR (600.13 MHz),  $\text{D}_2\text{O}$ , 303.0 K

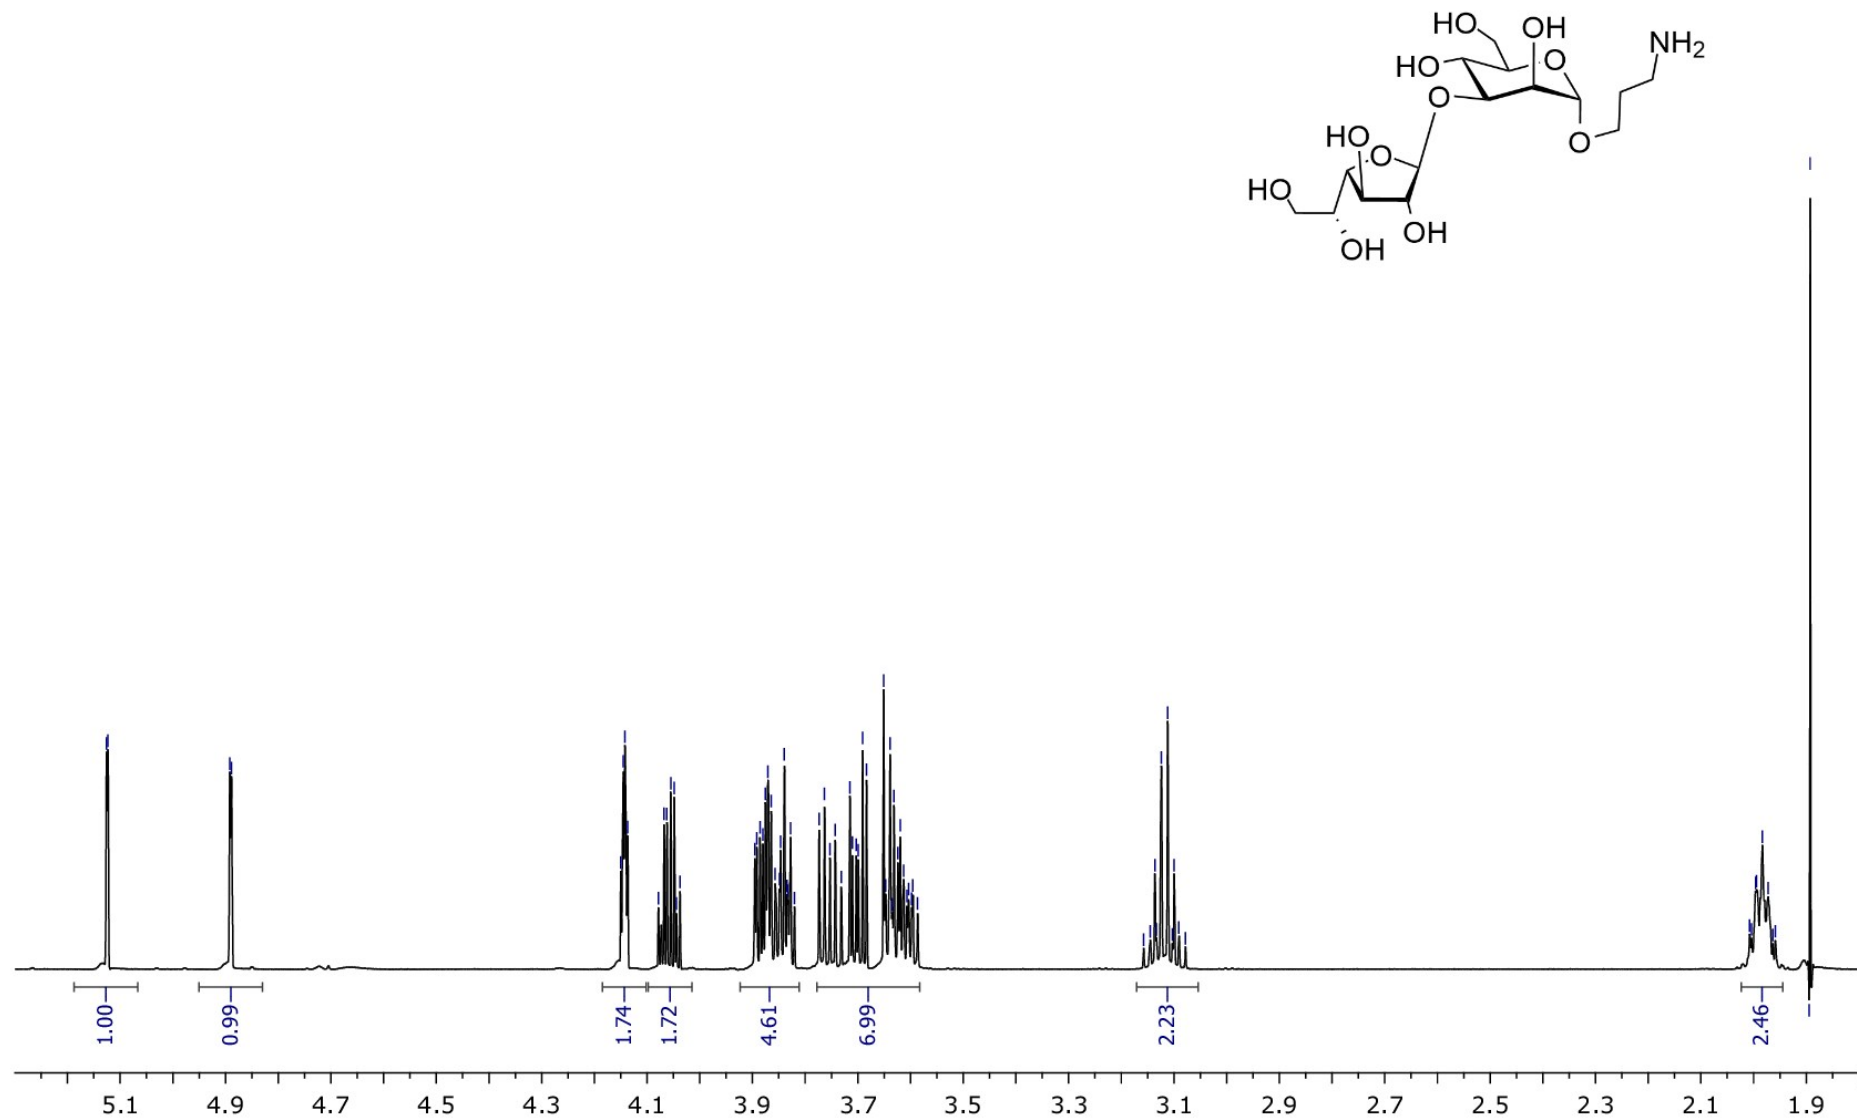

<sup>13</sup>C NMR (150.92 MHz), D<sub>2</sub>O, 303.2 K

— 105.05

— 100.23

— 83.69

— 82.00

— 77.72

— 76.12

— 73.45

— 71.47

— 67.30

— 65.68

— 65.62

— 63.48

— 61.66

— 38.13

— 27.34

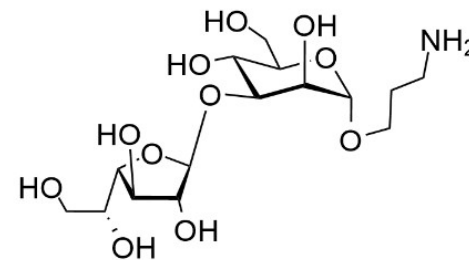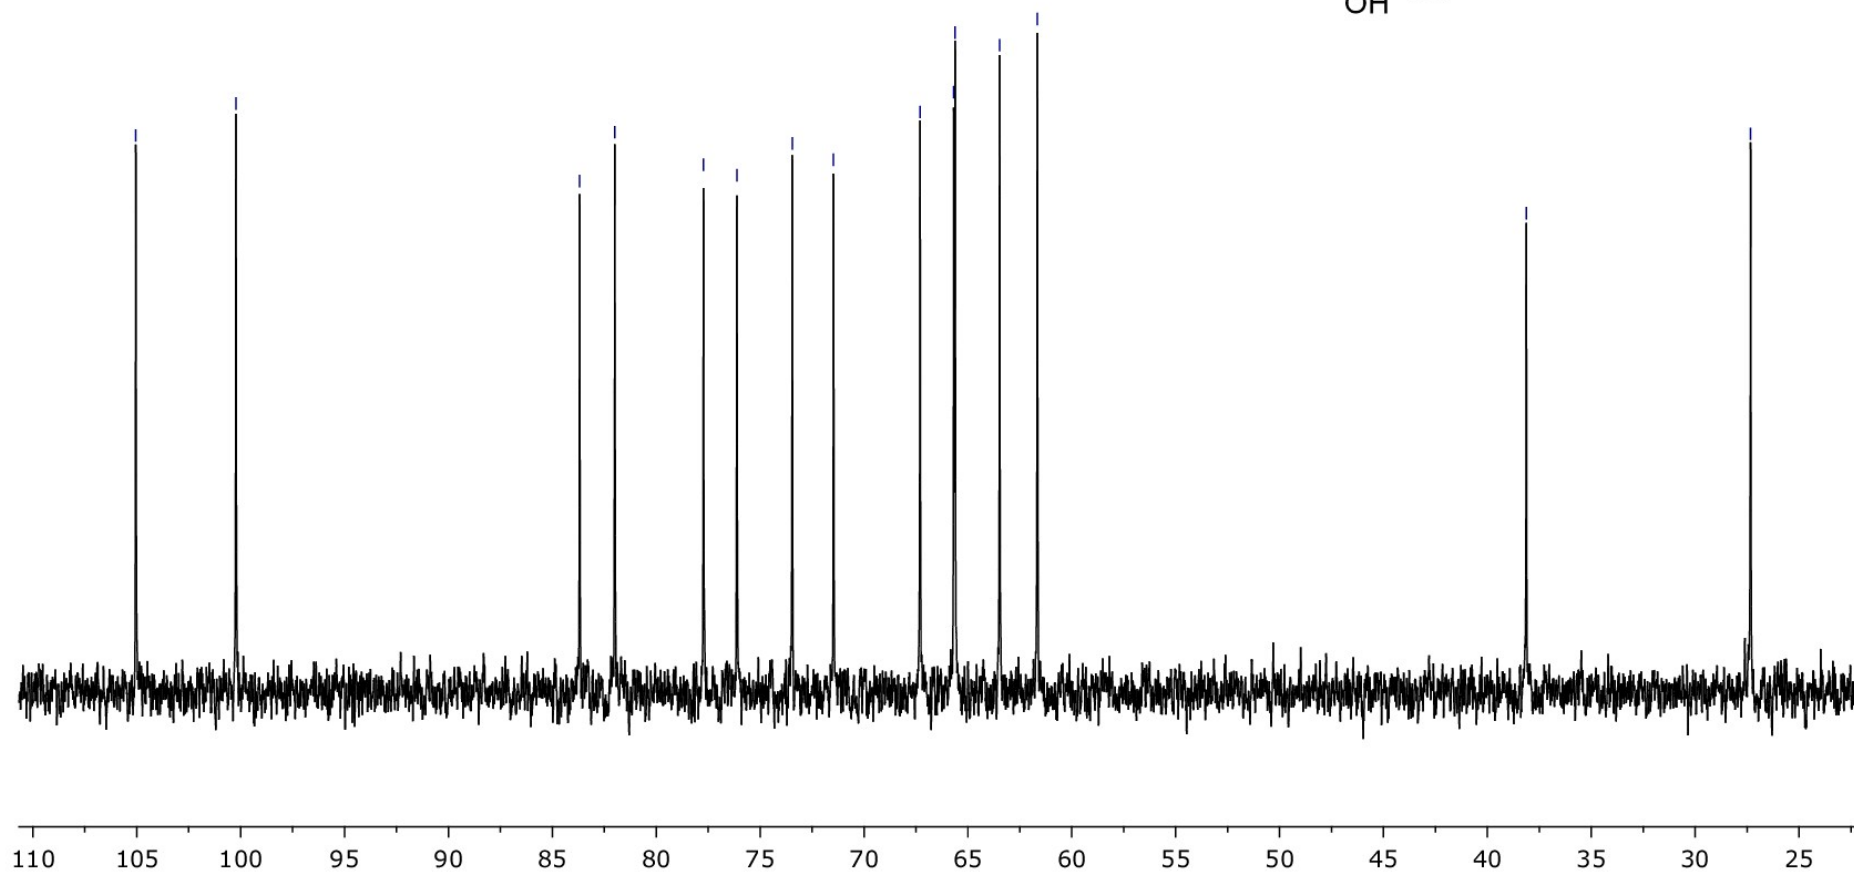

**3-Trifluoroacetamidopropyl 2,3,5-tri-*O*-benzoyl-6-*O*-(9-fluorenylmethoxycarbonyl)- $\beta$ -D-galactofuranosyl-(1 $\rightarrow$ 5)-2,3,6-tri-*O*-benzoyl- $\beta$ -D-galactofuranosyl-(1 $\rightarrow$ 3)-2-*O*-benzoyl-4,6-di-*O*-benzoyl- $\alpha$ -D-mannopyranoside 29**

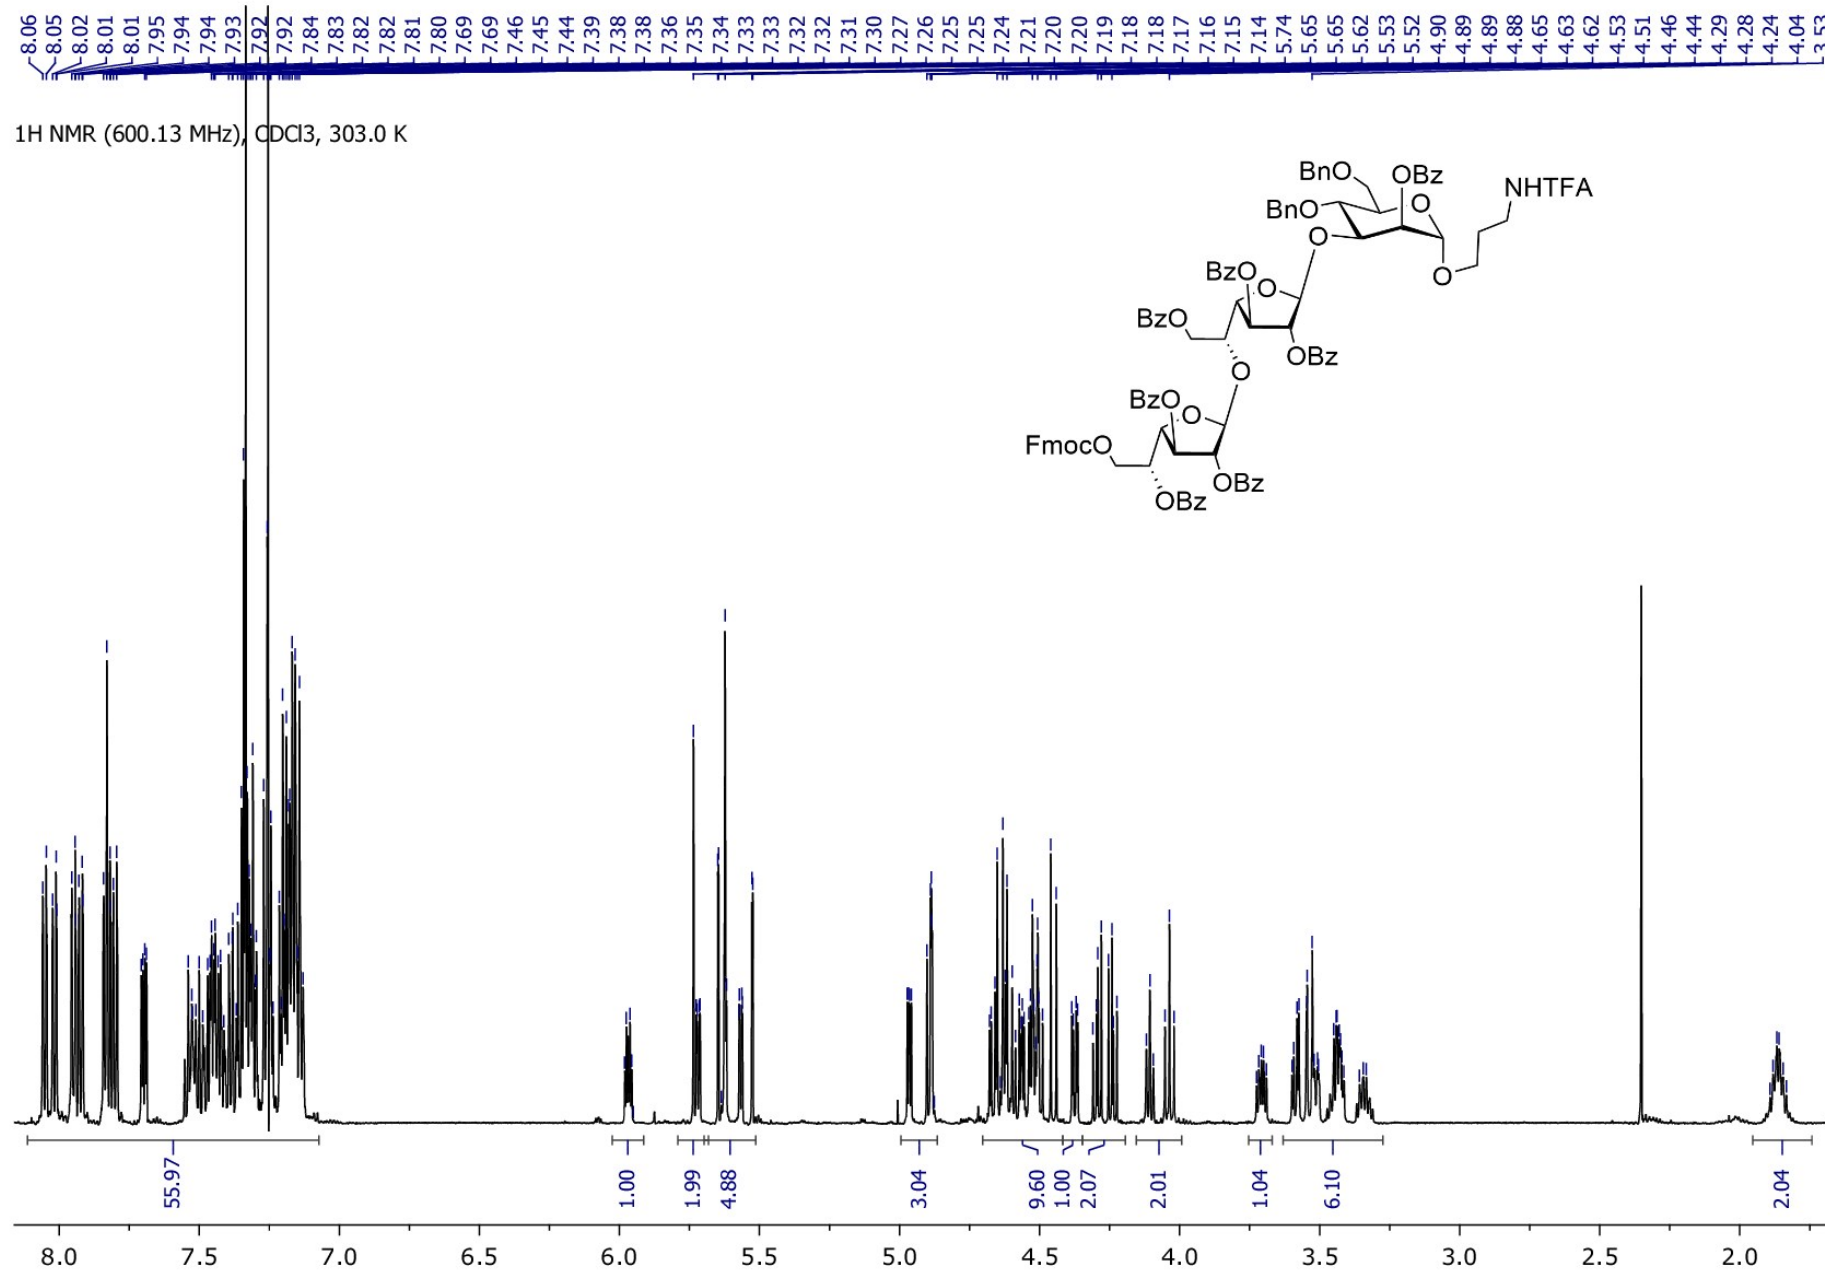

166.40  
165.85  
165.67  
165.54  
165.53  
165.20  
165.04  
133.30  
133.14  
130.03  
129.86  
129.82  
129.65  
128.43  
128.35  
128.33  
128.29  
128.25  
127.72  
127.52  
127.44  
127.08  
125.18  
119.89

105.36  
102.11  
97.78  
82.43  
82.27  
82.10  
81.75  
77.73  
77.56  
77.21  
77.00  
76.79  
75.11  
73.74  
73.44  
73.18  
71.84  
70.25  
70.05  
68.83  
67.79  
66.87  
65.45  
64.83  
46.61  
37.75  
28.45

<sup>13</sup>C NMR (150.92 MHz), CDCl<sub>3</sub>, 302.9 K

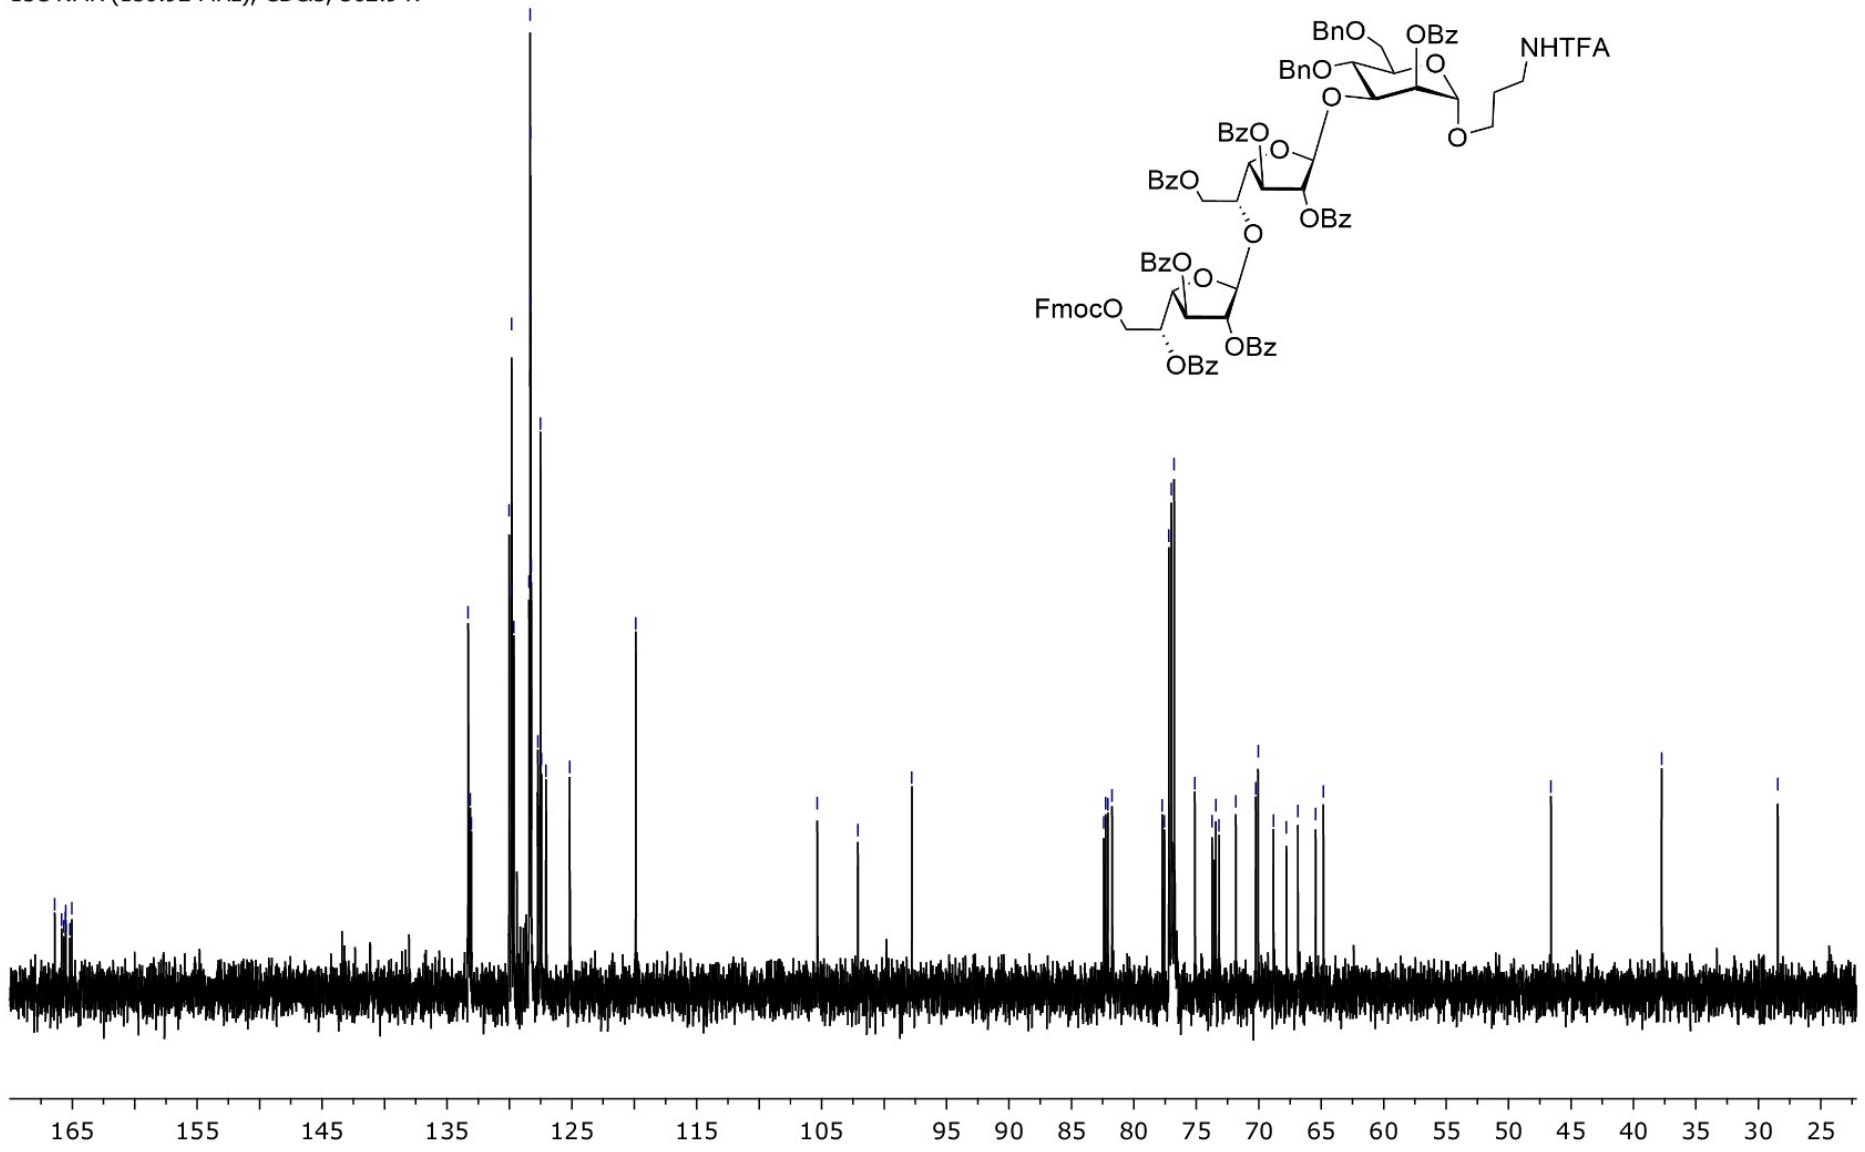



### 3-Aminopropyl $\beta$ -D-galactofuranosyl-(1 $\rightarrow$ 5)- $\beta$ -D-galactofuranosyl-(1 $\rightarrow$ 3)- $\alpha$ -D-mannopyranoside 6

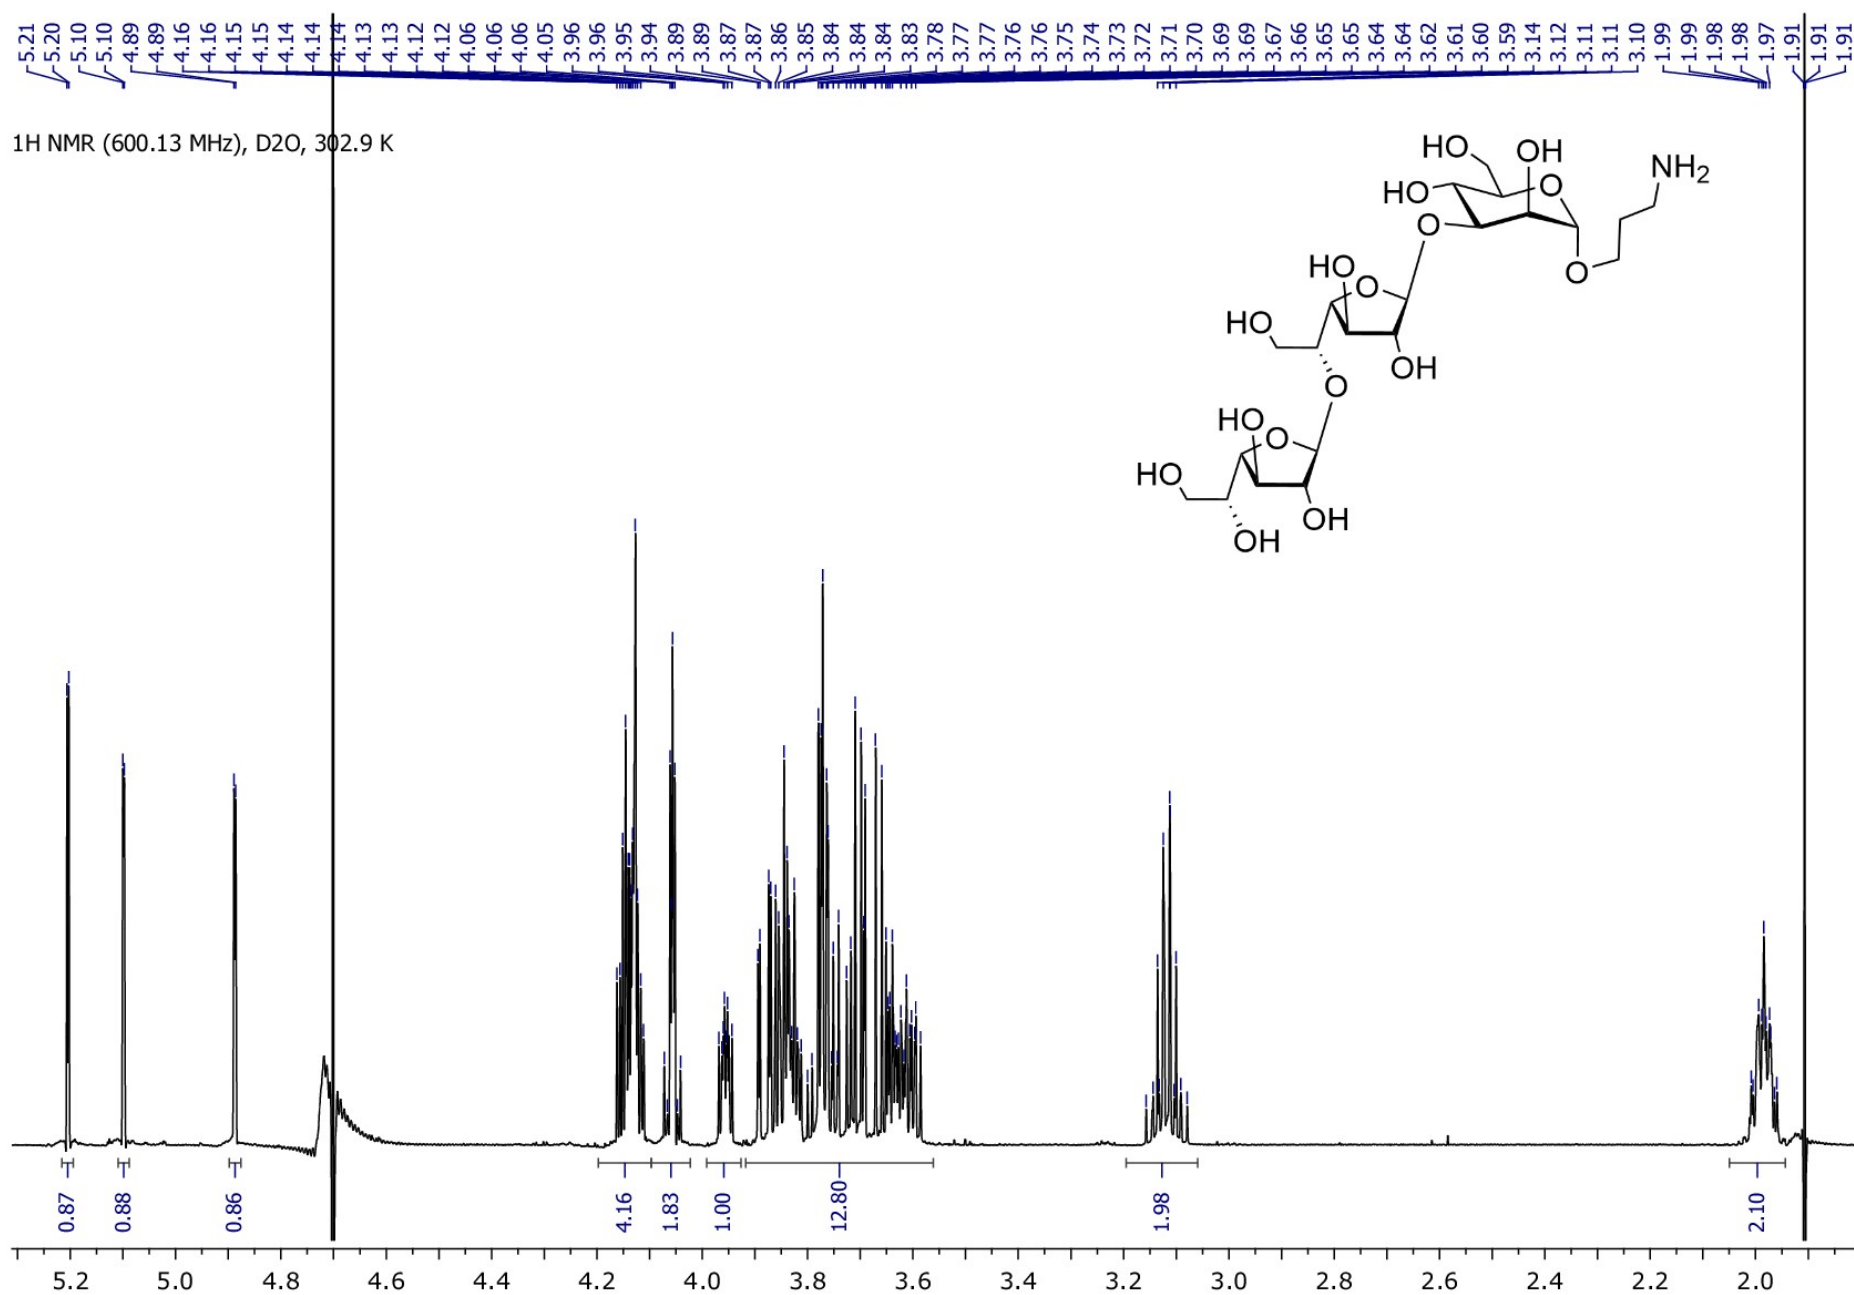

107.81  
105.07  
100.25

<sup>13</sup>C NMR (150.92 MHz), D<sub>2</sub>O, 303.0 K

83.36  
82.77  
82.01  
81.94  
77.62  
77.20  
76.60  
76.26  
73.45  
71.25  
67.34  
65.68  
65.62  
63.48  
61.86  
61.69

38.13

27.33

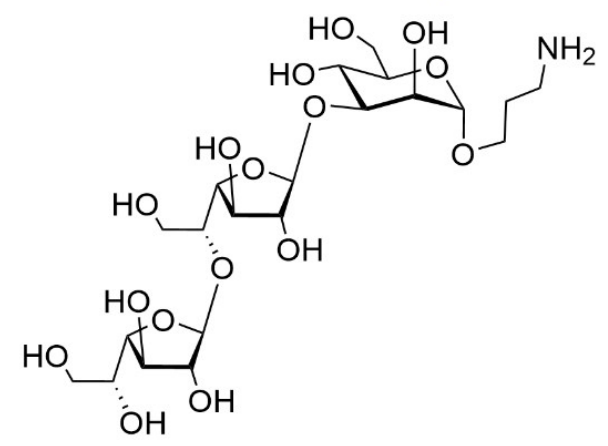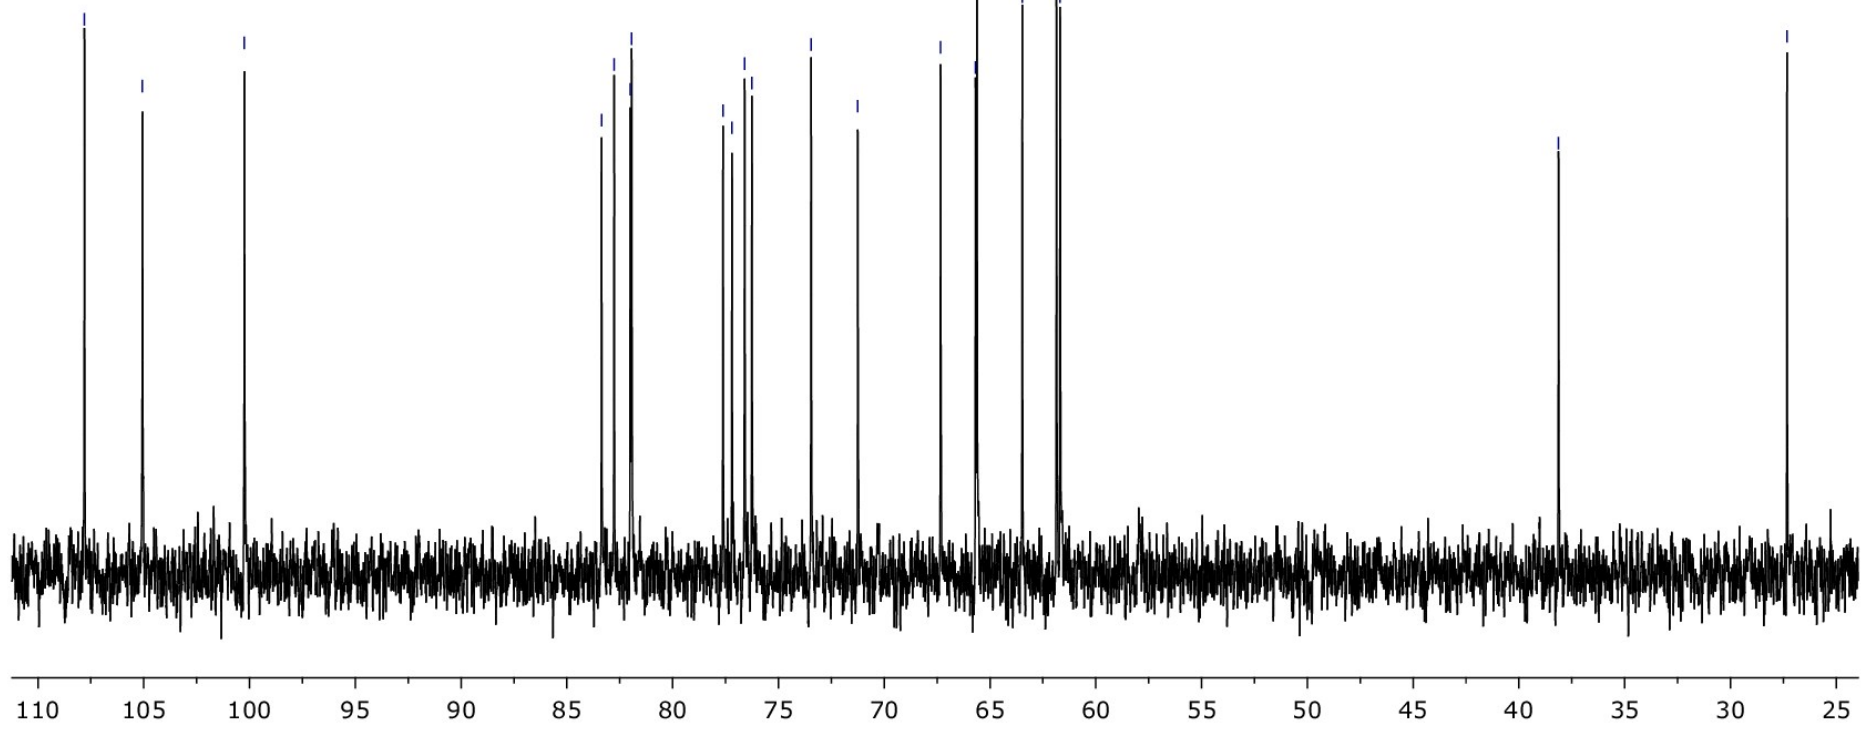

### 3-Trifluoroacetamidopropyl 2,3,5,6-tetra-*O*-benzoyl- $\beta$ -D-galactofuranosyl-(1 $\rightarrow$ 6)-2,3,4-tri-*O*-benzoyl- $\alpha$ -D-mannopyranoside 31

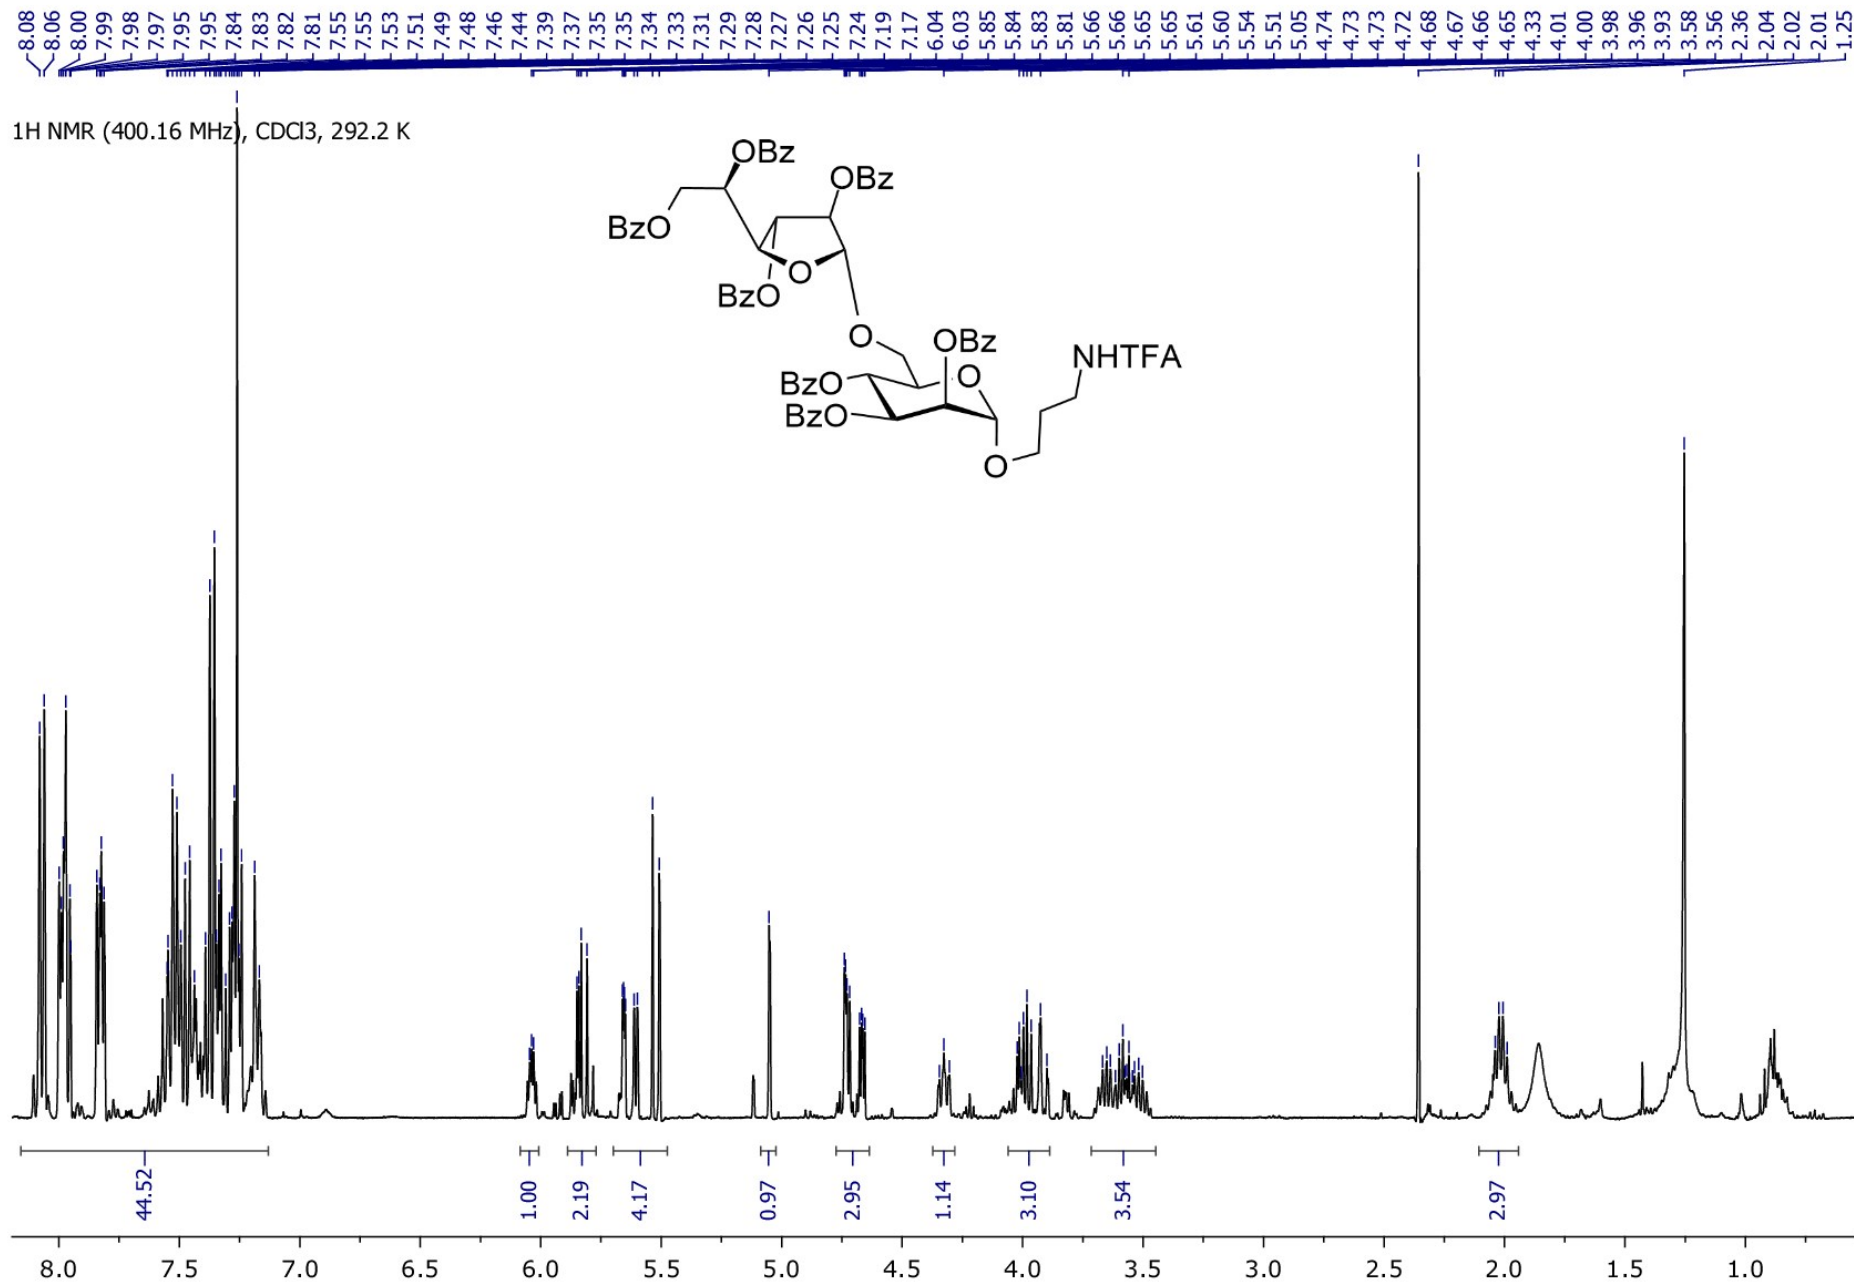

165.69  
165.59  
165.40  
162.86

133.61  
133.48  
133.27  
133.20  
133.10  
129.96  
129.85  
129.76  
129.70  
128.61  
128.45  
128.41  
128.35  
128.28

106.46

97.48

82.03  
81.23  
77.60  
77.32  
77.00  
76.68  
71.30  
70.35  
70.15  
69.80  
67.11  
66.23  
66.03  
63.62

37.57

29.69  
28.49

<sup>13</sup>C NMR (100.63 MHz), CDCl<sub>3</sub>, 292.6 K

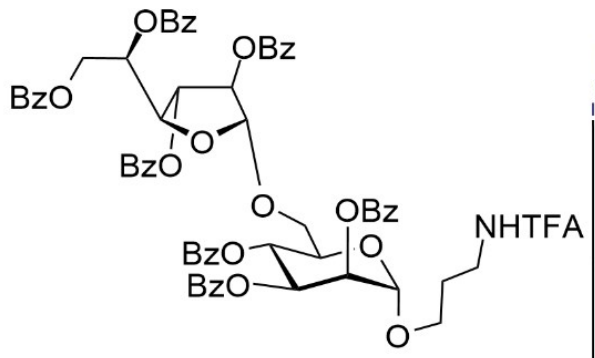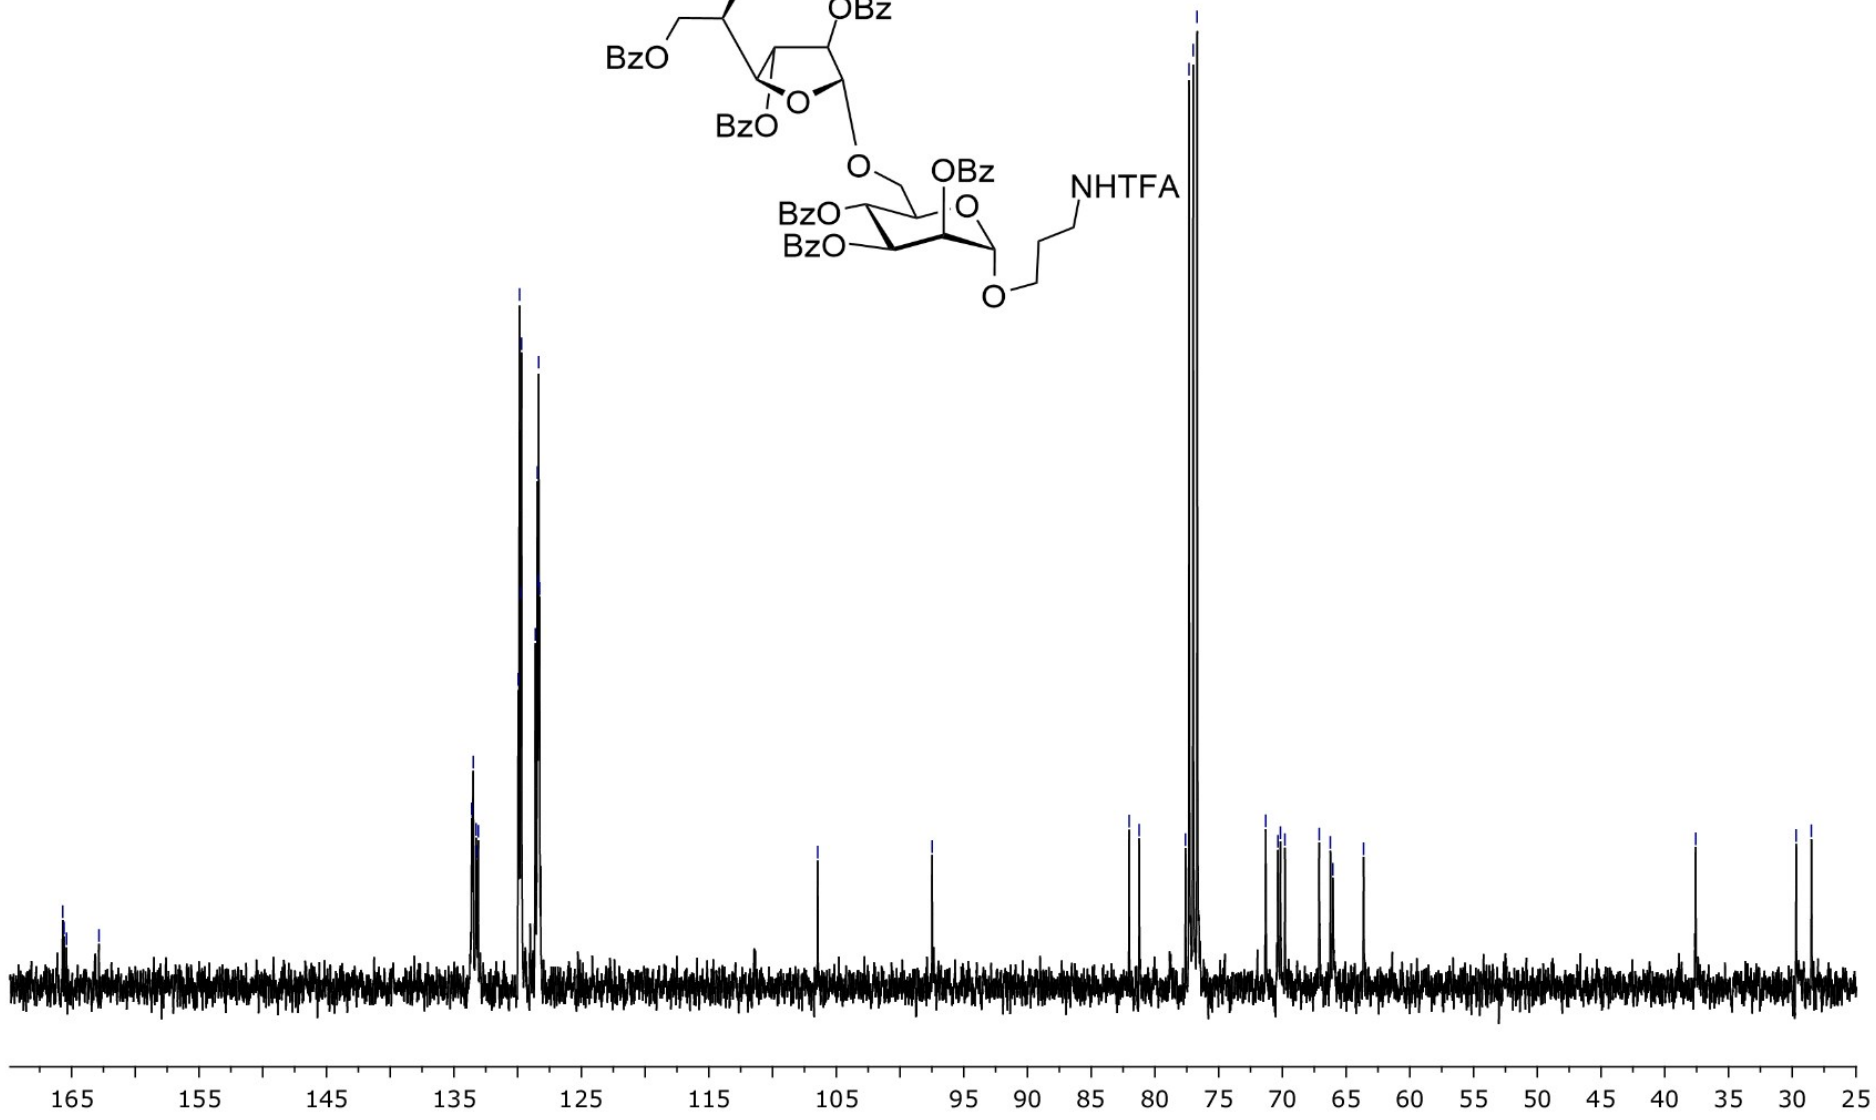

### 3-Aminopropyl $\beta$ -D-galactofuranosyl-(1 $\rightarrow$ 6)- $\alpha$ -D-mannopyranoside 8

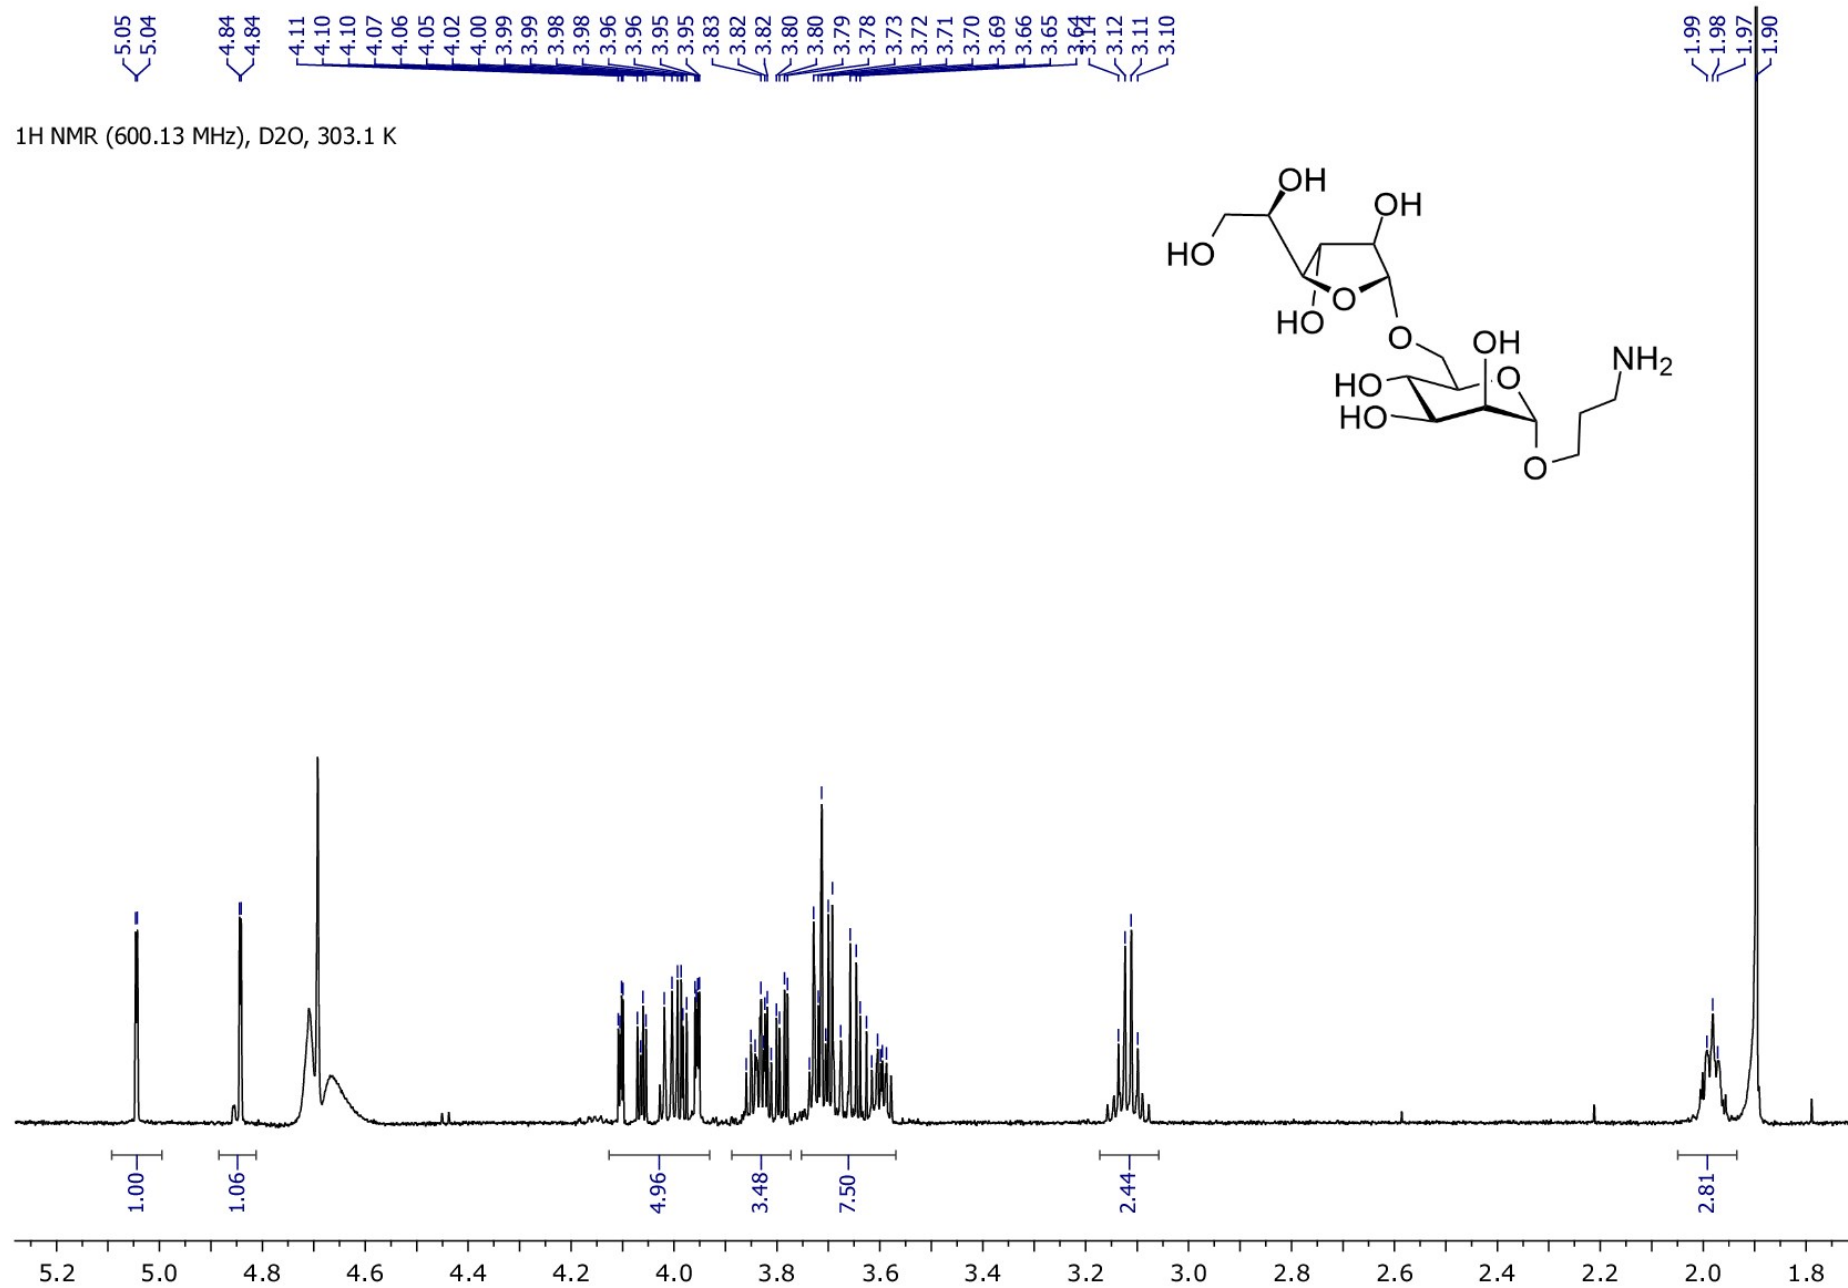

<sup>13</sup>C NMR (150.92 MHz), D<sub>2</sub>O, 303.1 K

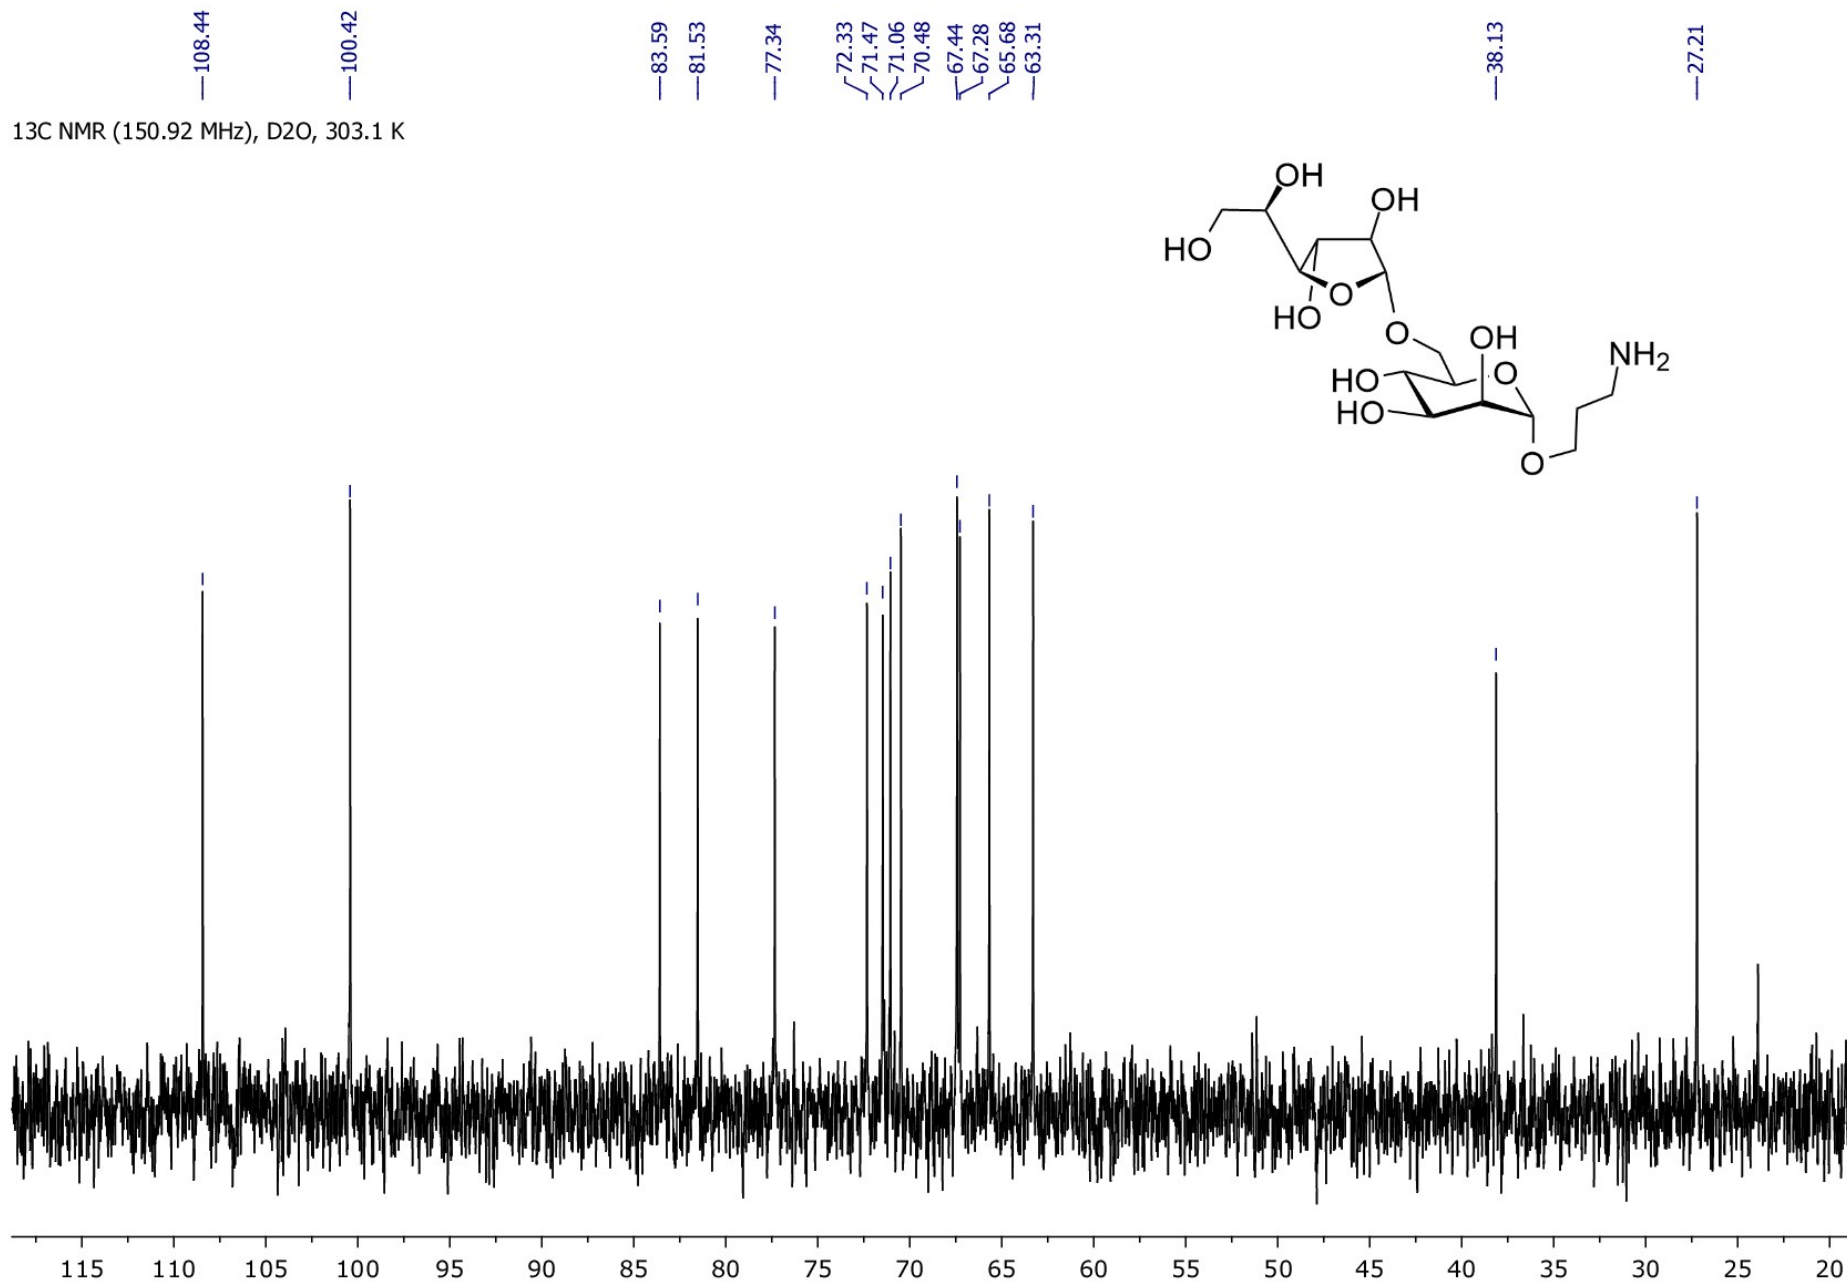

**3-Trifluoroacetamidopropyl 2,3,5-tri-O-benzoyl-6-O-(9-fluorenylmethoxycarbonyl)- $\beta$ -D-galactofuranosyl-(1 $\rightarrow$ 2)-3,4,6-tri-O-benzyl- $\alpha$ -D-mannopyranosyl-(1 $\rightarrow$ 2)-3,4,6-tri-O-benzyl- $\alpha$ -D-mannopyranoside 33**

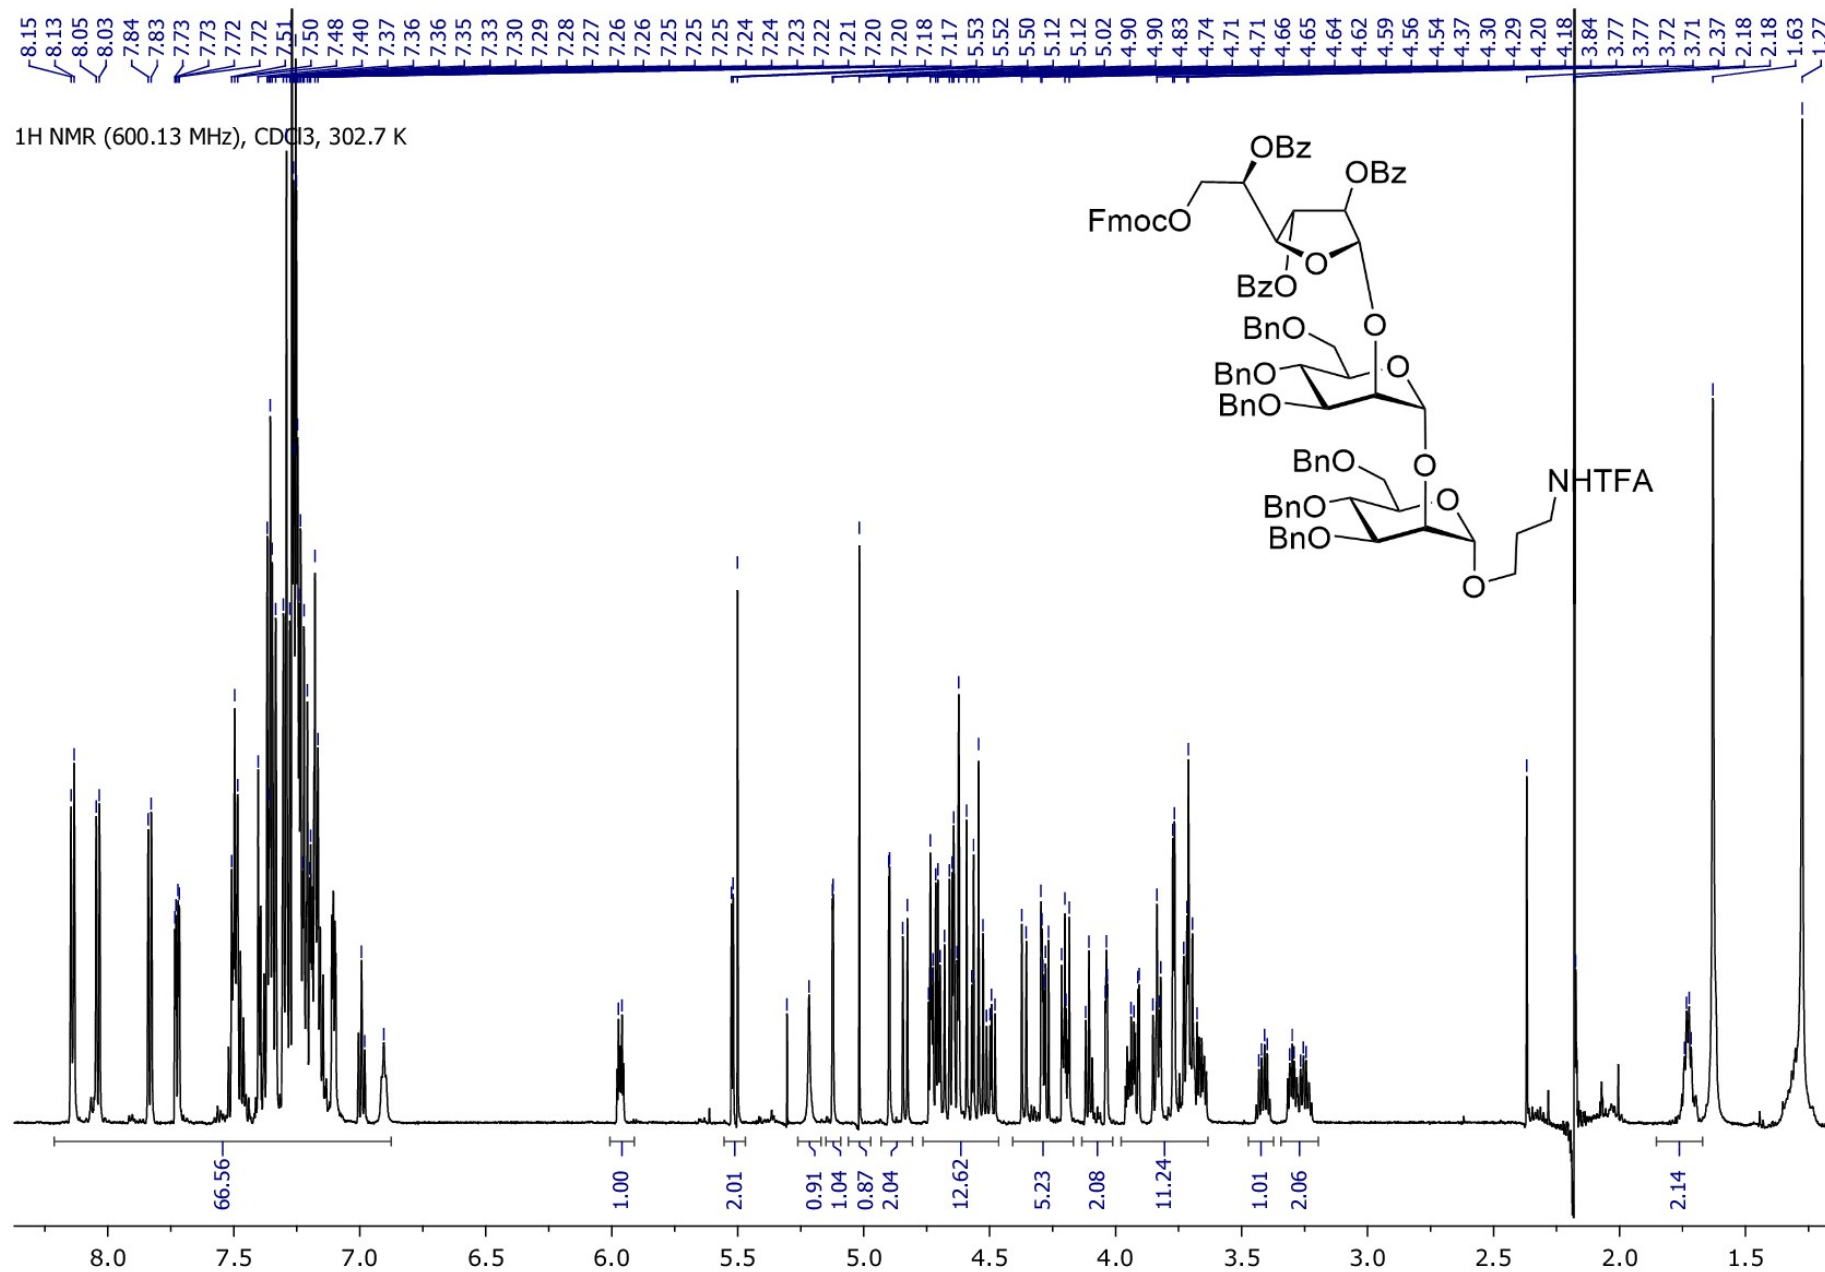

165.53  
165.13  
154.77  
143.27  
141.17  
138.28  
138.22  
129.99  
128.37  
128.35  
128.31  
127.74  
127.55  
127.11  
119.89

$^{13}\text{C}$  NMR (150.92 MHz),  $\text{CDCl}_3$ , 303.4 K

103.59  
99.24  
99.08  
82.34  
81.27  
79.74  
78.02  
77.75  
77.21  
77.00  
76.79  
75.58  
75.18  
74.98  
74.90  
74.73  
74.73  
73.54  
73.39  
72.53  
72.21  
70.41  
70.09  
69.83  
69.43  
66.72  
65.86  
46.56  
37.99  
30.87  
29.68  
28.10

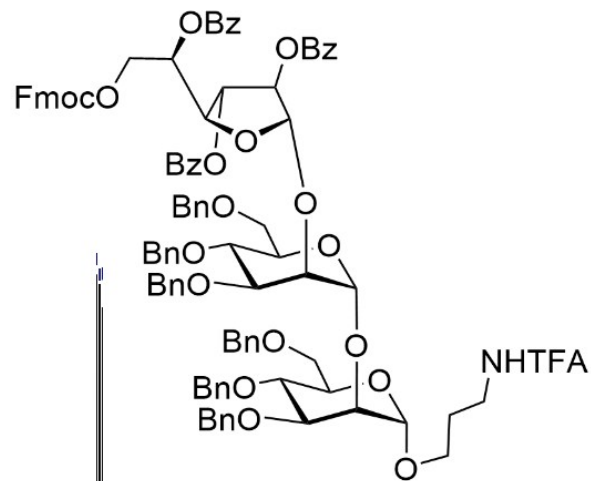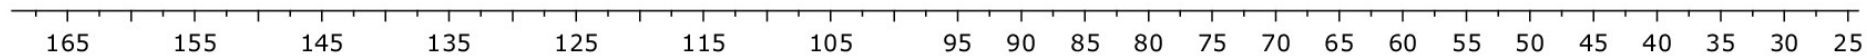



### 3-Aminopropyl $\beta$ -D-galactofuranosyl-(1 $\rightarrow$ 2)- $\alpha$ -D-mannopyranosyl-(1 $\rightarrow$ 2)- $\alpha$ -D-mannopyranoside 13

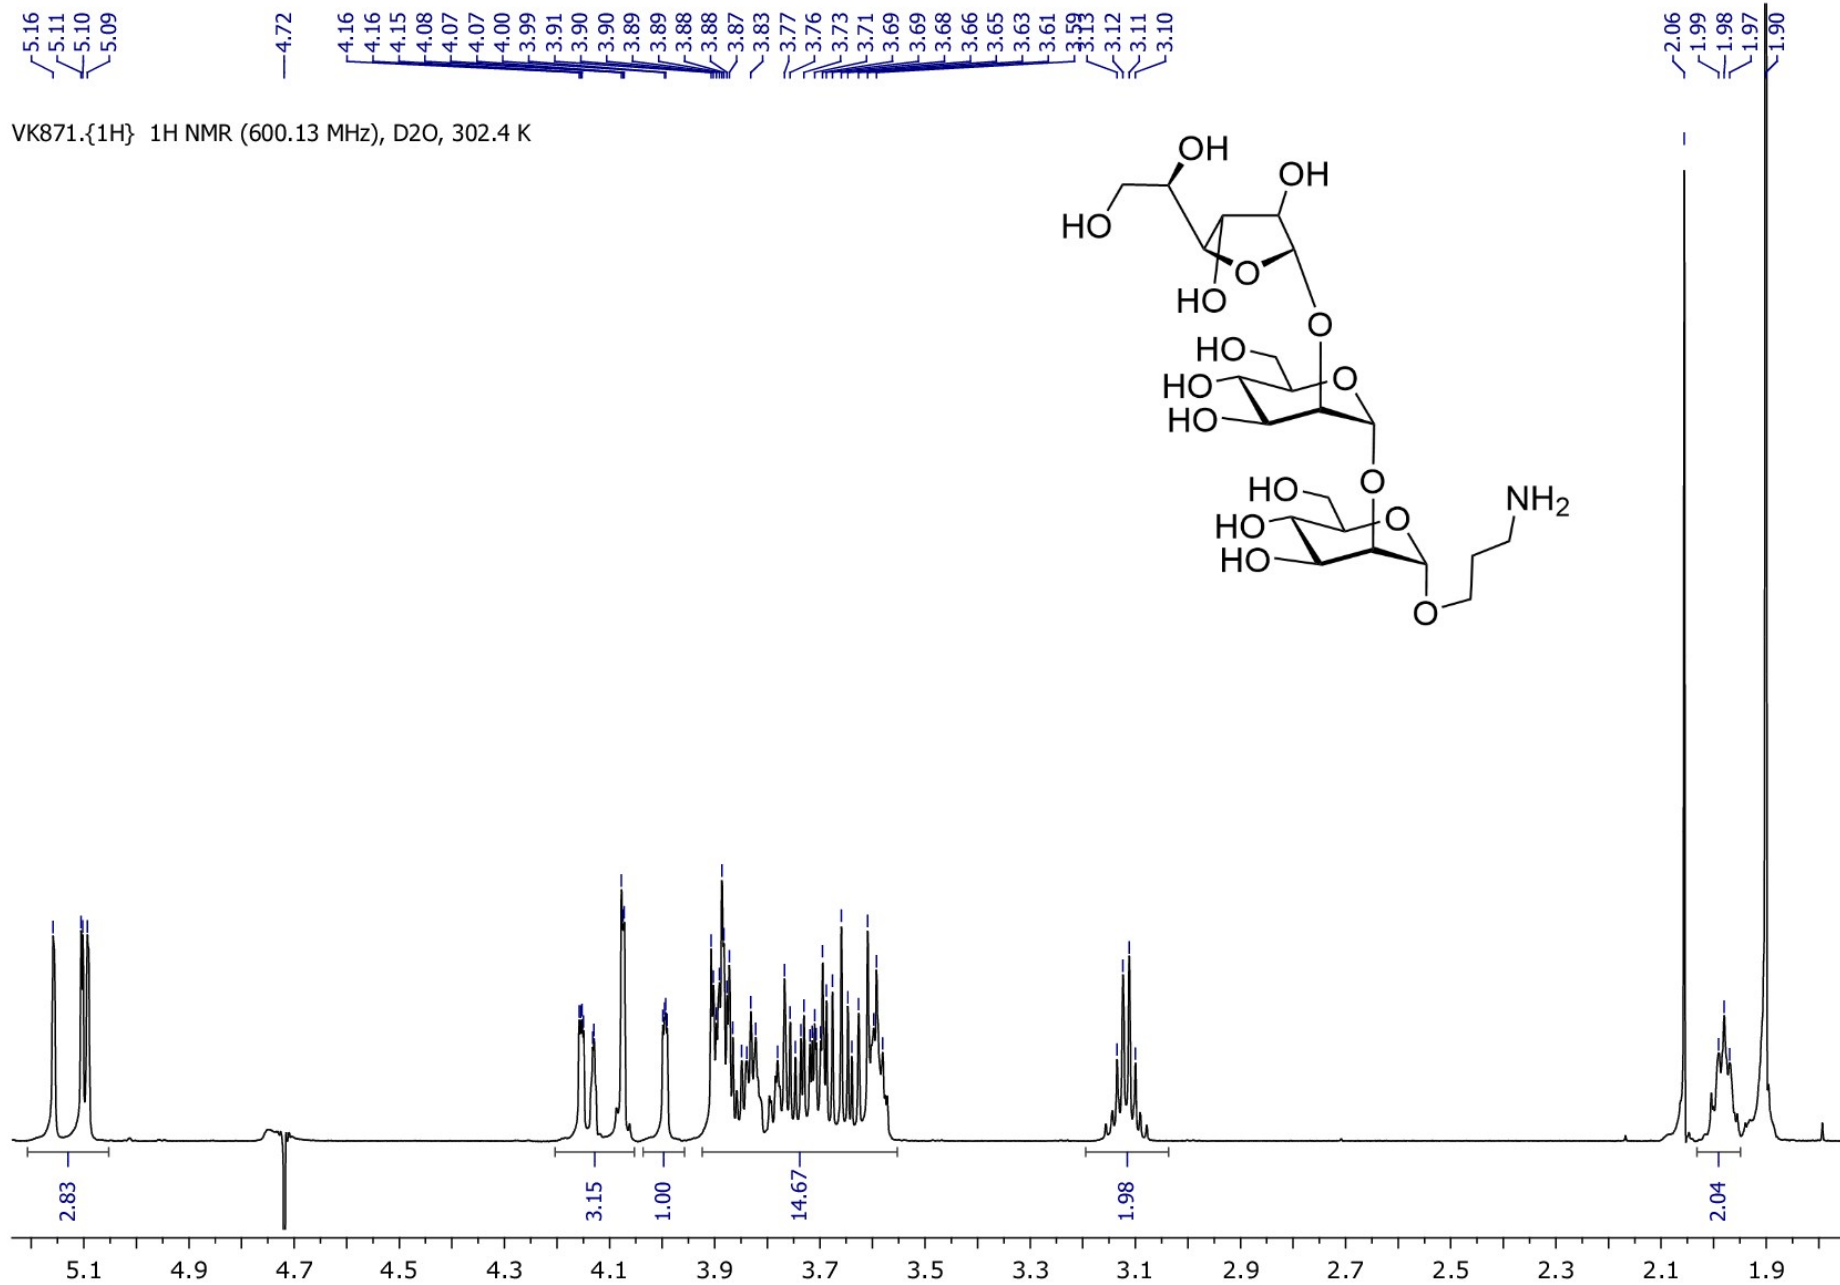

VK871-<sup>13</sup>C} 13C NMR (150.92 MHz), D2O, 303.4 K

- 83.53
- 81.68
- 79.47
- 77.21
- 75.47
- 74.07
- 73.55
- 71.33
- 70.83
- 70.17
- 67.84
- 67.63
- 65.67
- 63.41
- 61.69
- 61.65

- 38.13
- 27.29
- 23.94

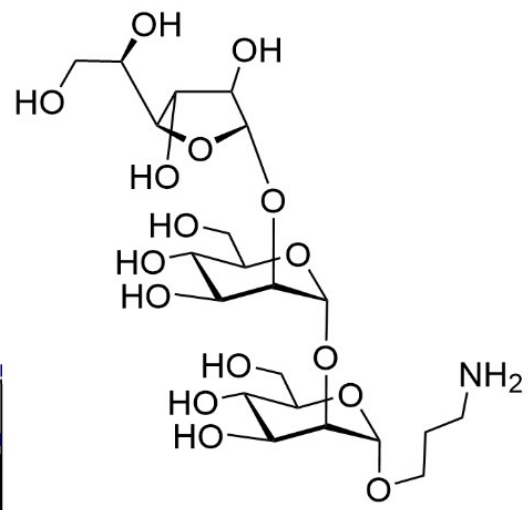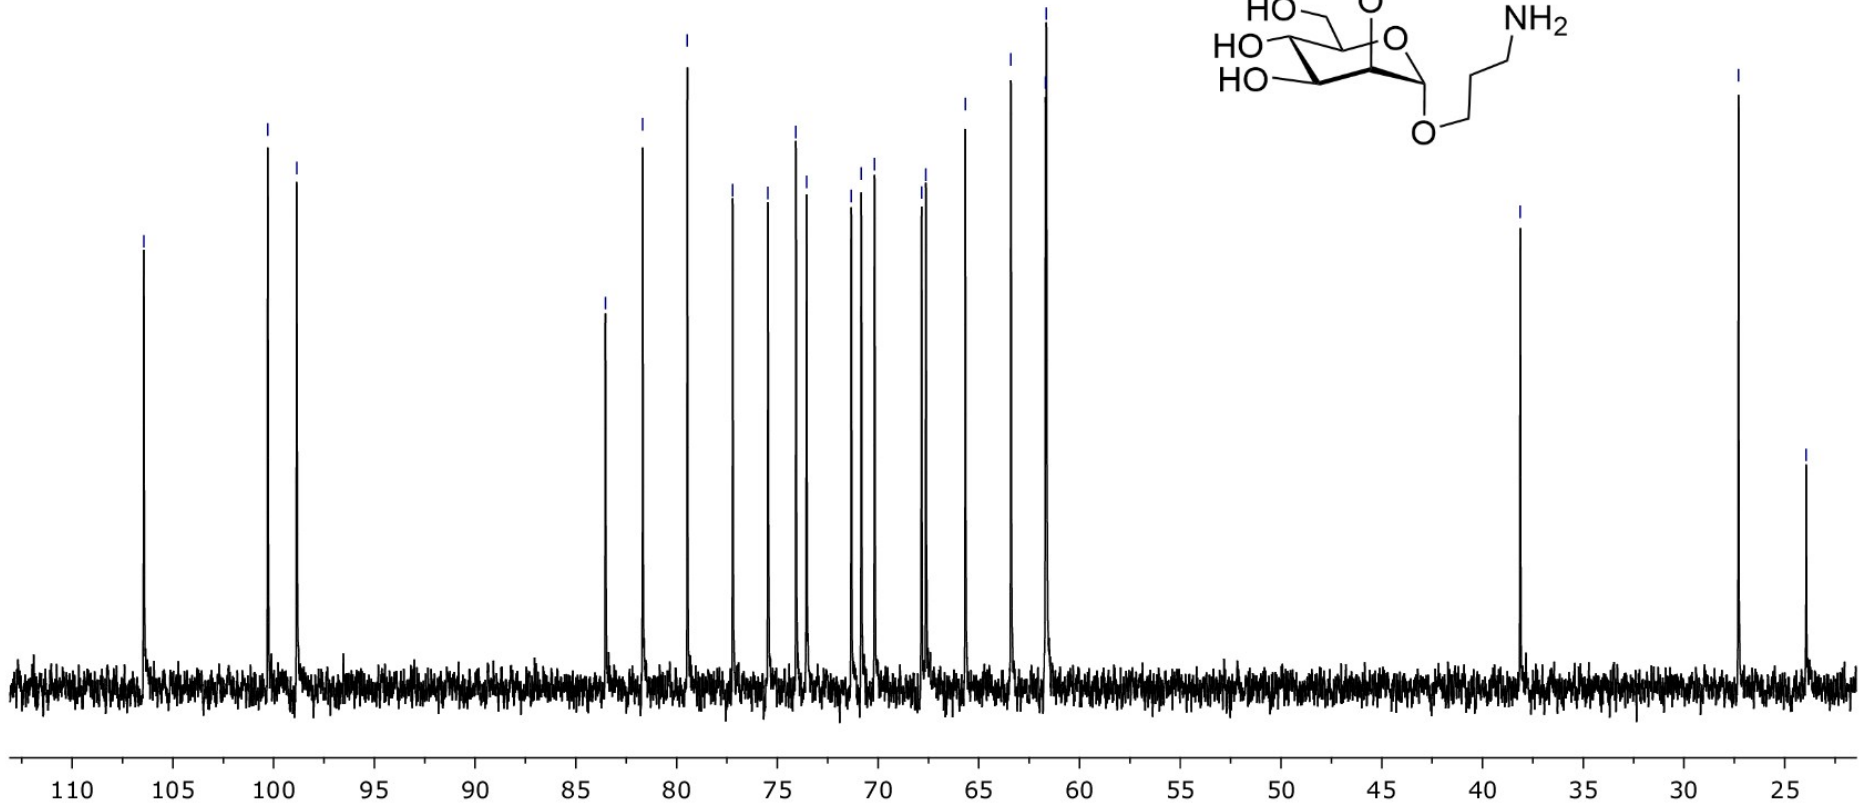

Supplement: c7ob02734f1.pdf [file c7ob02734f1.pdf]
